# Supplementary material for: Copper-catalyzed intramolecular cross dehydrogenative coupling approach to coumestans from 2′-hydroxyl-3-arylcoumarins
Source: Royal Society of Chemistry journal article supplement (doi:10.1039/c9ra01909j), 2019-01-01
Supplement: c9ra01909j2.pdf [file c9ra01909j2.pdf]

Data File: F:\高分辨数据\Zouyong\SXH\SJF-2A.lcd

| Elmt | Val. | Min | Max | Elmt | Val. | Min | Max | Elmt | Val. | Min | Max | Use Adduct |
|------|------|-----|-----|------|------|-----|-----|------|------|-----|-----|------------|
| H    | 1    | 0   | 10  | O    | 2    | 0   | 4   | Cl   | 1    | 0   | 0   | H          |
| B    | 3    | 0   | 0   | F    | 1    | 0   | 0   | Br   | 1    | 0   | 0   | HCOO       |
| C    | 4    | 0   | 15  | P    | 3    | 0   | 0   | I    | 3    | 0   | 0   | CH3COO     |
| N    | 3    | 0   | 0   | S    | 2    | 0   | 0   |      |      |     |     | Cl         |

Error Margin (ppm): 5  
 HC Ratio: unlimited  
 Max Isotopes: all  
 MSn Iso RI (%): 75.00

DBE Range: -1.0 - 1500.0  
 Apply N Rule: no  
 Isotope RI (%): 1.00  
 MSn Logic Mode: AND

Electron Ions: both  
 Use MSn Info: no  
 Isotope Res: 10000  
 Max Results: 40

2a

Event#: 2 MS(E-) Ret. Time : 0.720 Scan# : 110

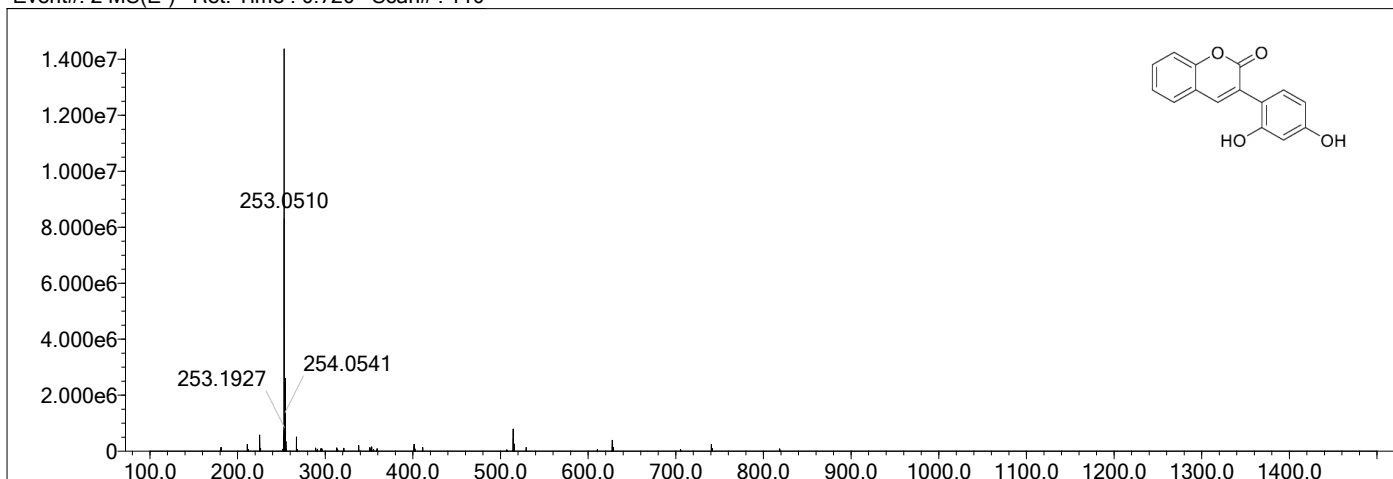

Measured region for 253.0510 m/z

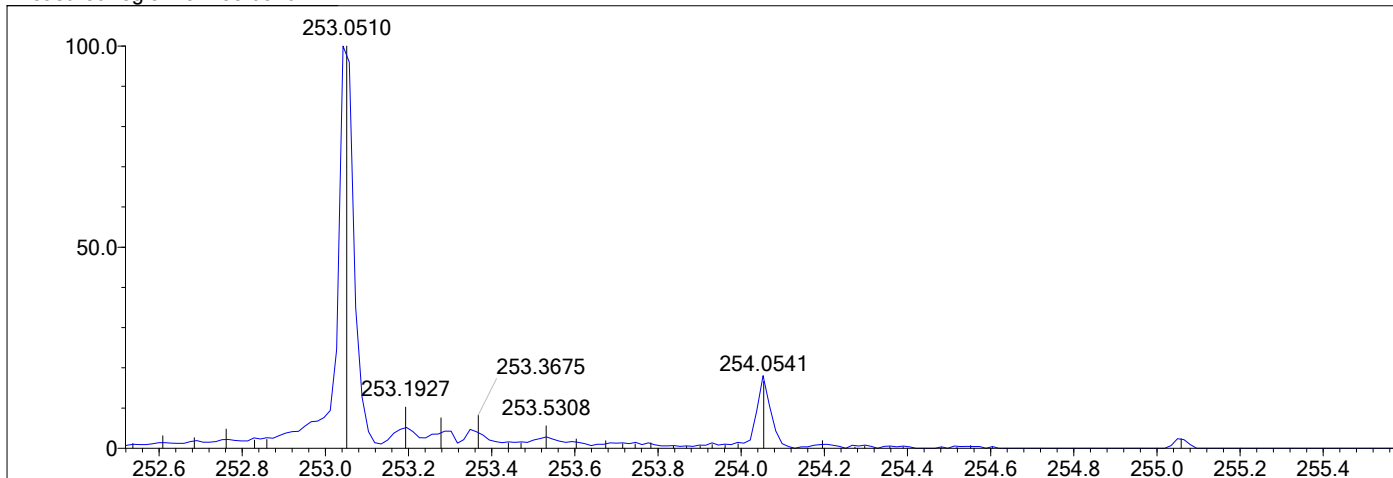

C15 H10 O4 [M-H]- : Predicted region for 253.0506 m/z

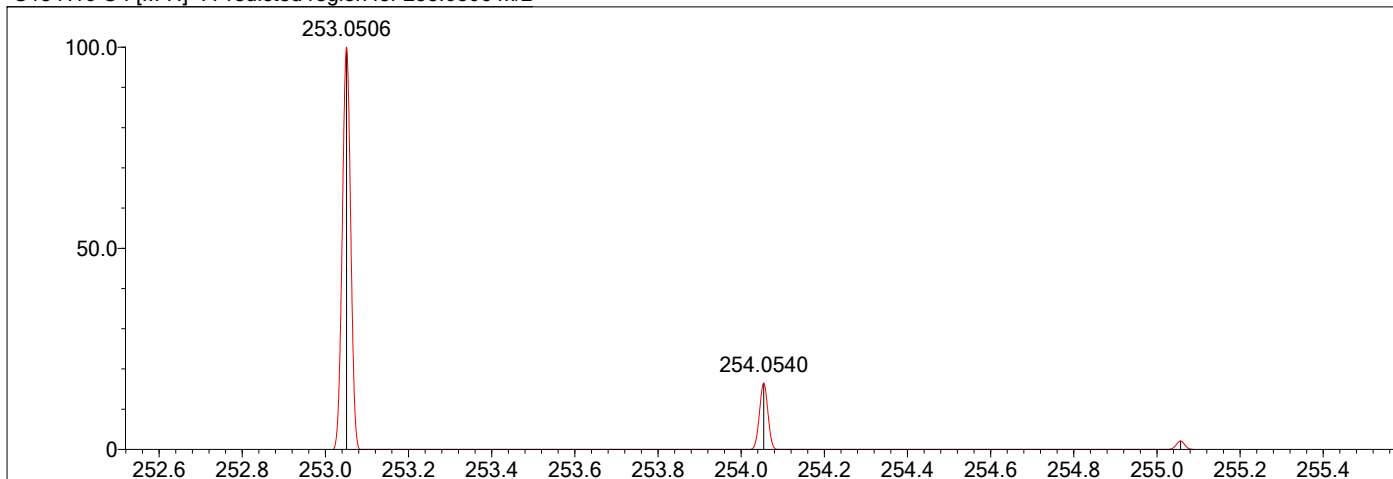

| Rank | Score | Formula (M) | Ion    | Meas. m/z | Pred. m/z | Df. (mDa) | Df. (ppm) | Iso   | DBE  |
|------|-------|-------------|--------|-----------|-----------|-----------|-----------|-------|------|
| 1    | 92.22 | C15 H10 O4  | [M-H]- | 253.0510  | 253.0506  | 0.4       | 1.58      | 93.57 | 11.0 |

Data File: F:\高分辨数据\Zouyong\SXH\SJF-2B.lcd

| Elmt | Val. | Min | Max | Elmt | Val. | Min | Max | Elmt | Val. | Min | Max | Use Adduct |
|------|------|-----|-----|------|------|-----|-----|------|------|-----|-----|------------|
| H    | 1    | 0   | 10  | O    | 2    | 0   | 3   | Cl   | 1    | 0   | 0   | H          |
| B    | 3    | 0   | 0   | F    | 1    | 0   | 0   | Br   | 1    | 0   | 0   | Na         |
| C    | 4    | 0   | 15  | P    | 3    | 0   | 0   | I    | 3    | 0   | 0   | K          |
| N    | 3    | 0   | 0   | S    | 2    | 0   | 0   |      |      |     |     | NH4        |

Error Margin (ppm): 5  
 HC Ratio: unlimited  
 Max Isotopes: all  
 MSn Iso RI (%): 75.00

DBE Range: -1.0 - 1500.0  
 Apply N Rule: no  
 Isotope RI (%): 1.00  
 MSn Logic Mode: AND

Electron Ions: both  
 Use MSn Info: no  
 Isotope Res: 10000  
 Max Results: 40

Event#: 1 MS(E+) Ret. Time : 0.933 Scan# : 141

2b

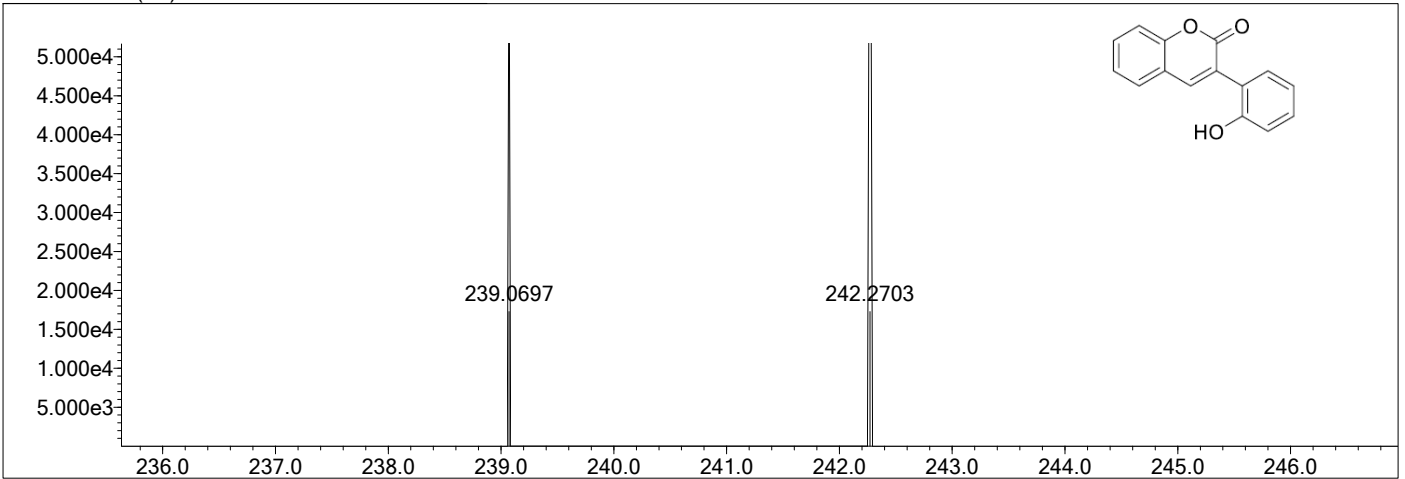

Measured region for 239.0697 m/z

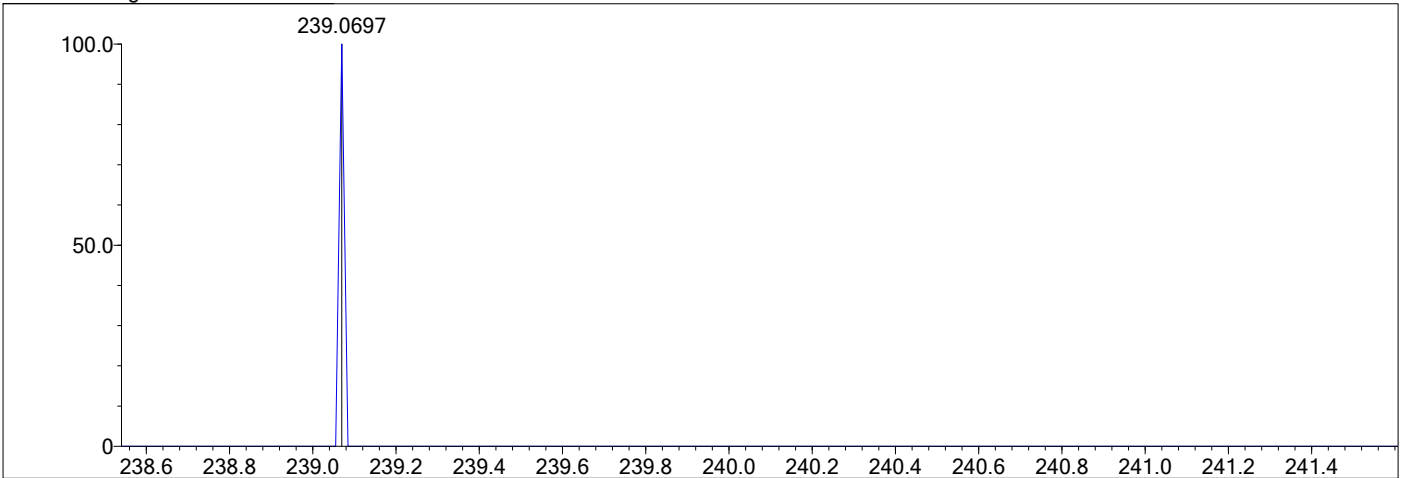

C15 H10 O3 [M+H]+ : Predicted region for 239.0703 m/z

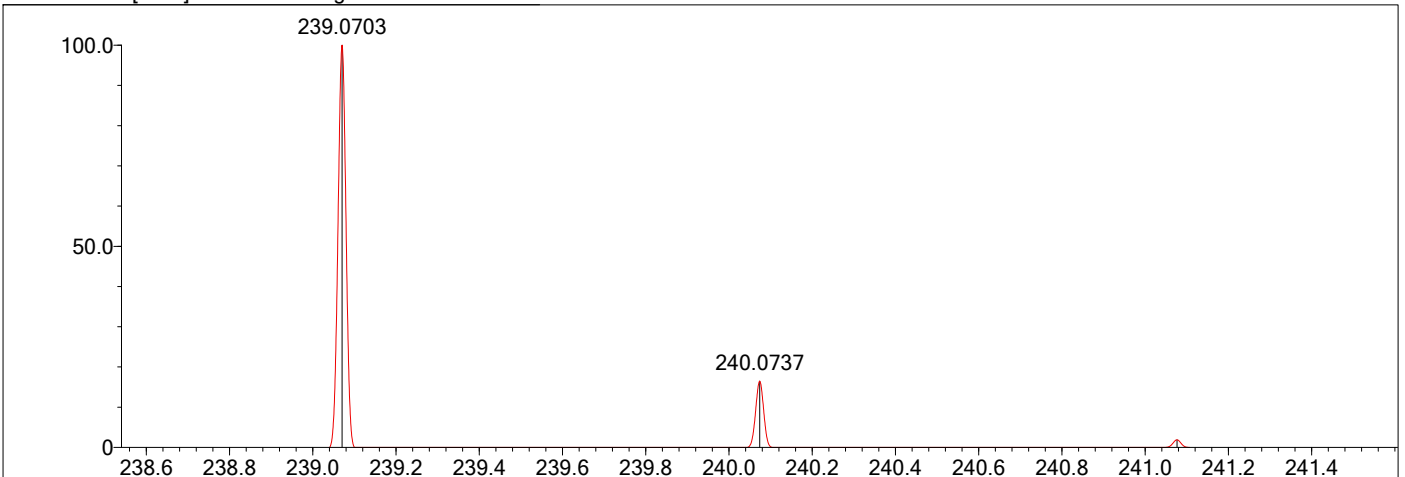

| Rank | Score | Formula (M) | Ion    | Meas. m/z | Pred. m/z | Df. (mDa) | Df. (ppm) | Iso  | DBE  |
|------|-------|-------------|--------|-----------|-----------|-----------|-----------|------|------|
| 1    | 0.00  | C15 H10 O3  | [M+H]+ | 239.0697  | 239.0703  | -0.6      | -2.51     | 0.00 | 11.0 |

Data File: \\Deep-20160624\data1\邹永\SXH\SJF-2C.lcd

| Elmt | Val. | Min | Max | Use Adduct |
|------|------|-----|-----|------|------|-----|-----|------|------|-----|-----|------|------|-----|-----|------------|
| H    | 1    | 0   | 80  | O    | 2    | 0   | 7   | K    | 1    | 0   | 0   | Pd   | 2    | 0   | 0   | H          |
| 2H   | 1    | 0   | 0   | F    | 1    | 0   | 0   | Mn   | 3    | 0   | 0   | I    | 3    | 0   | 0   | Na         |
| 3H   | 1    | 0   | 0   | Si   | 4    | 0   | 0   | Fe   | 2    | 0   | 0   | Pt   | 2    | 0   | 0   | K          |
| B    | 3    | 0   | 0   | P    | 3    | 0   | 0   | Cu   | 2    | 0   | 0   | Au   | 1    | 0   | 0   |            |
| C    | 4    | 0   | 30  | S    | 2    | 0   | 0   | Se   | 2    | 0   | 0   |      |      |     |     |            |
| N    | 3    | 0   | 8   | Cl   | 1    | 0   | 0   | Br   | 1    | 0   | 0   |      |      |     |     |            |

Error Margin (ppm): 50  
 HC Ratio: 0.0 - 20.0  
 Max Isotopes: all  
 MSn Iso RI (%): 75.00

DBE Range: -100.0 - 1000.0  
 Apply N Rule: yes  
 Isotope RI (%): 1.00  
 MSn Logic Mode: AND

Electron Ions: both  
 Use MSn Info: no  
 Isotope Res: 10000  
 Max Results: 2000

Event#: 1 MS(E+) Ret. Time: 0.160 Scan#: 25

2c

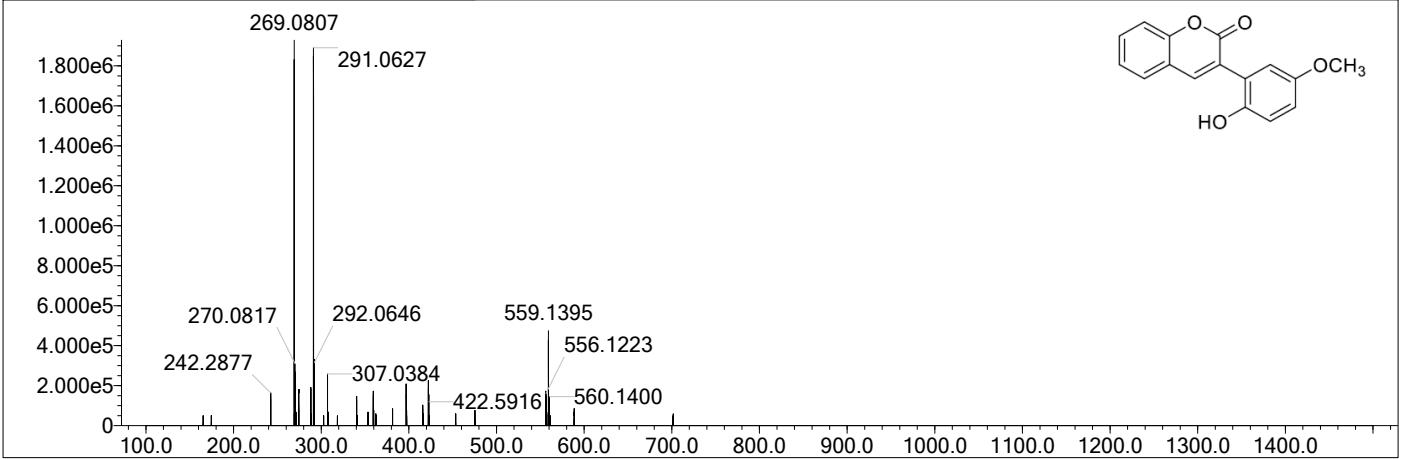

Measured region for 269.0807 m/z

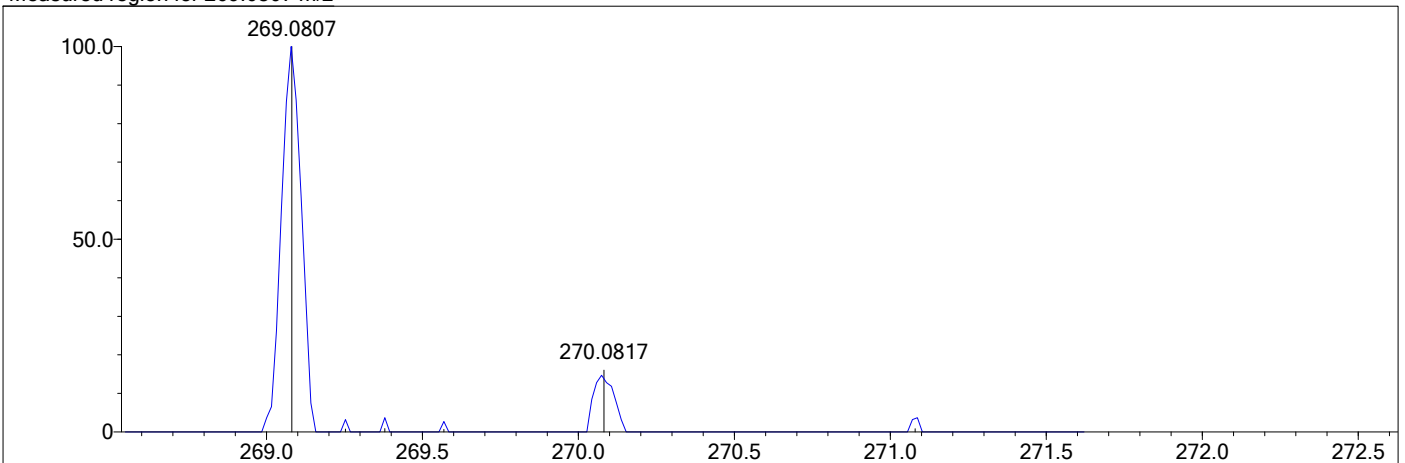

C16 H12 O4 [M+H]<sup>+</sup> : Predicted region for 269.0808 m/z

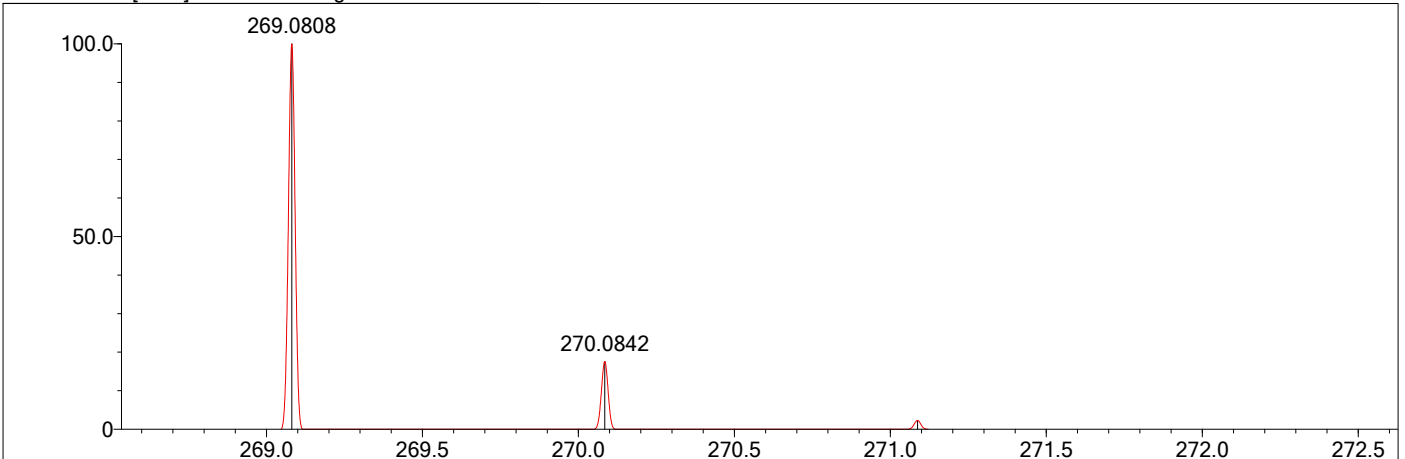

| Rank | Score | Formula (M) | Ion                | Meas. m/z | Pred. m/z | Df. (mDa) | Df. (ppm) | Iso   | DBE  |
|------|-------|-------------|--------------------|-----------|-----------|-----------|-----------|-------|------|
| 2    | 64.46 | C16 H12 O4  | [M+H] <sup>+</sup> | 269.0807  | 269.0808  | -0.1      | -0.37     | 64.46 | 11.0 |

Data File: \\Deep-20160624\data1\邹永\SXH\SJF-2D.lcd

| Elmt | Val. | Min | Max | Use Adduct |
|------|------|-----|-----|------|------|-----|-----|------|------|-----|-----|------|------|-----|-----|------------|
| H    | 1    | 0   | 80  | O    | 2    | 0   | 7   | K    | 1    | 0   | 0   | Pd   | 2    | 0   | 0   | H          |
| 2H   | 1    | 0   | 0   | F    | 1    | 0   | 0   | Mn   | 3    | 0   | 0   | I    | 3    | 0   | 0   | Na         |
| 3H   | 1    | 0   | 0   | Si   | 4    | 0   | 0   | Fe   | 2    | 0   | 0   | Pt   | 2    | 0   | 0   | K          |
| B    | 3    | 0   | 0   | P    | 3    | 0   | 0   | Cu   | 2    | 0   | 0   | Au   | 1    | 0   | 0   |            |
| C    | 4    | 0   | 30  | S    | 2    | 0   | 0   | Se   | 2    | 0   | 0   |      |      |     |     |            |
| N    | 3    | 0   | 8   | Cl   | 1    | 0   | 0   | Br   | 1    | 0   | 0   |      |      |     |     |            |

Error Margin (ppm): 50  
 HC Ratio: 0.0 - 20.0  
 Max Isotopes: all  
 MSn Iso RI (%): 75.00

DBE Range: -100.0 - 1000.0  
 Apply N Rule: yes  
 Isotope RI (%): 1.00  
 MSn Logic Mode: AND

Electron Ions: both  
 Use MSn Info: no  
 Isotope Res: 10000  
 Max Results: 2000

Event#: 1 MS(E+) Ret. Time: 0.147 Scan#: 23

2d

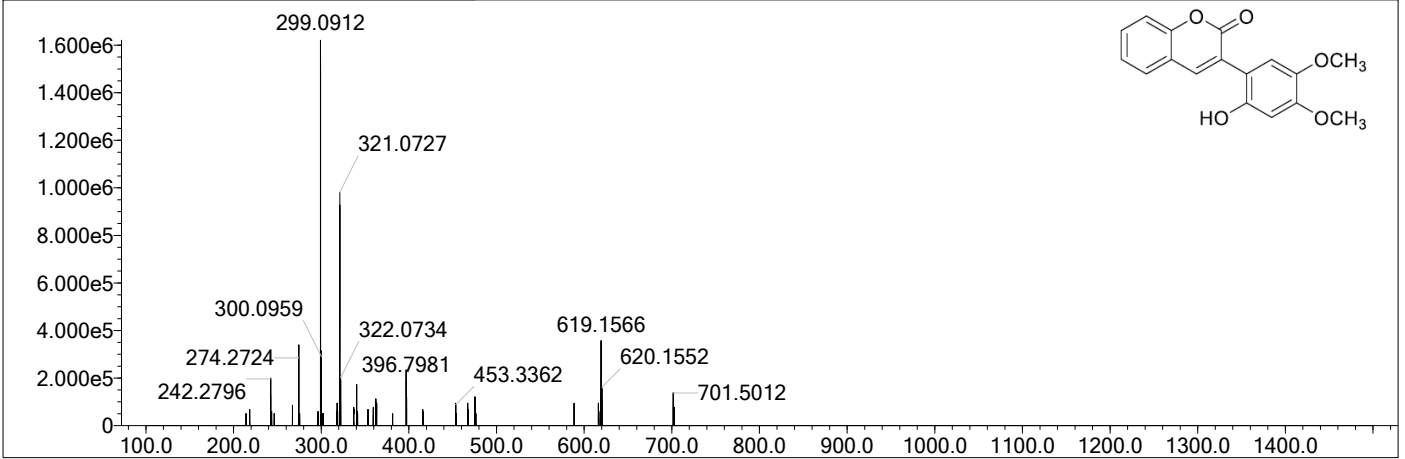

Measured region for 299.0912 m/z

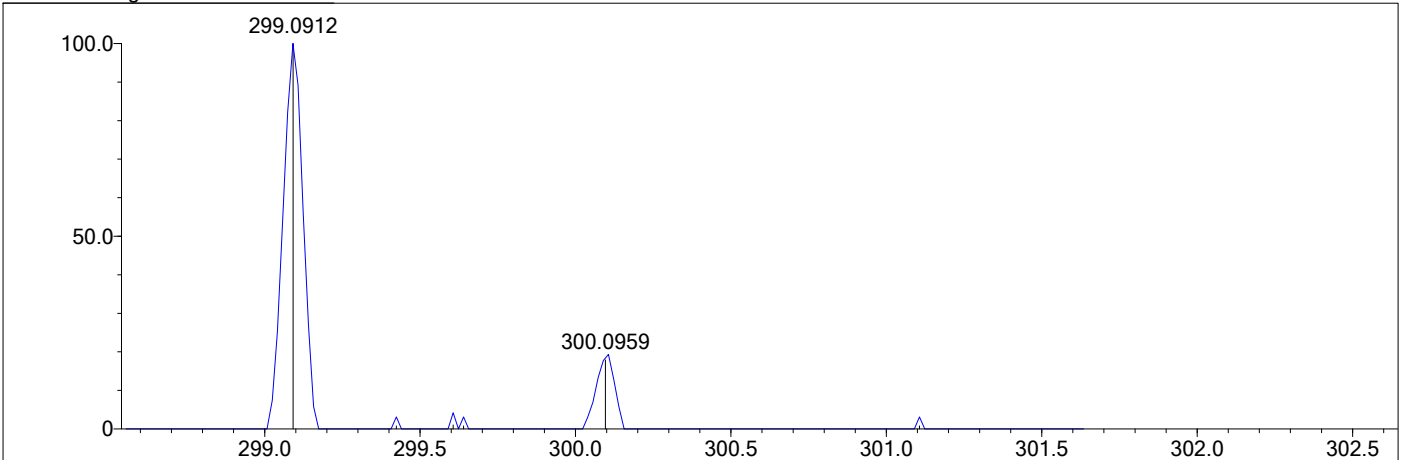

C17 H14 O5 [M+H]+ : Predicted region for 299.0914 m/z

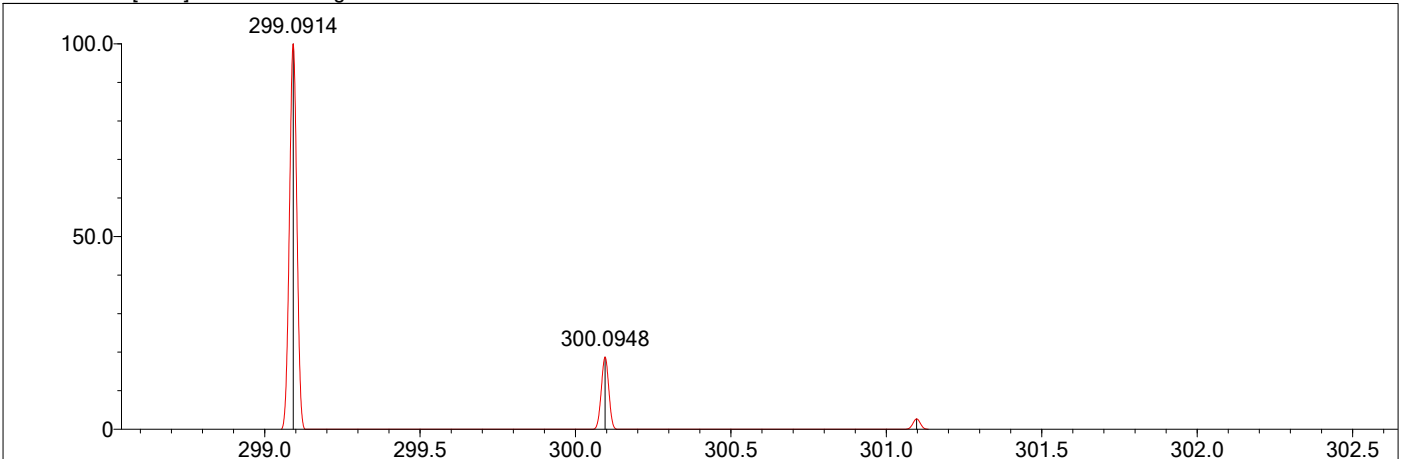

| Rank | Score | Formula (M) | Ion    | Meas. m/z | Pred. m/z | Df. (mDa) | Df. (ppm) | Iso   | DBE  |
|------|-------|-------------|--------|-----------|-----------|-----------|-----------|-------|------|
| 1    | 69.34 | C17 H14 O5  | [M+H]+ | 299.0912  | 299.0914  | -0.2      | -0.67     | 69.34 | 11.0 |

Data File: \\Deep-20160624\data1\邹永\SXH\SJF-2E.lcd

| Elmt | Val. | Min | Max | Use Adduct |
|------|------|-----|-----|------|------|-----|-----|------|------|-----|-----|------|------|-----|-----|------------|
| H    | 1    | 0   | 80  | O    | 2    | 0   | 7   | K    | 1    | 0   | 0   | Pd   | 2    | 0   | 0   | H          |
| 2H   | 1    | 0   | 0   | F    | 1    | 0   | 0   | Mn   | 3    | 0   | 0   | I    | 3    | 0   | 0   | Na         |
| 3H   | 1    | 0   | 0   | Si   | 4    | 0   | 0   | Fe   | 2    | 0   | 0   | Pt   | 2    | 0   | 0   | K          |
| B    | 3    | 0   | 0   | P    | 3    | 0   | 0   | Cu   | 2    | 0   | 0   | Au   | 1    | 0   | 0   |            |
| C    | 4    | 0   | 30  | S    | 2    | 0   | 0   | Se   | 2    | 0   | 0   |      |      |     |     |            |
| N    | 3    | 0   | 8   | Cl   | 1    | 0   | 0   | Br   | 1    | 0   | 0   |      |      |     |     |            |

Error Margin (ppm): 50  
 HC Ratio: 0.0 - 20.0  
 Max Isotopes: all  
 MSn Iso RI (%): 75.00

DBE Range: -100.0 - 1000.0  
 Apply N Rule: yes  
 Isotope RI (%): 1.00  
 MSn Logic Mode: AND

Electron Ions: both  
 Use MSn Info: no  
 Isotope Res: 10000  
 Max Results: 2000

Event#: 1 MS(E+) Ret. Time : 0.173 Scan#: 27

2e

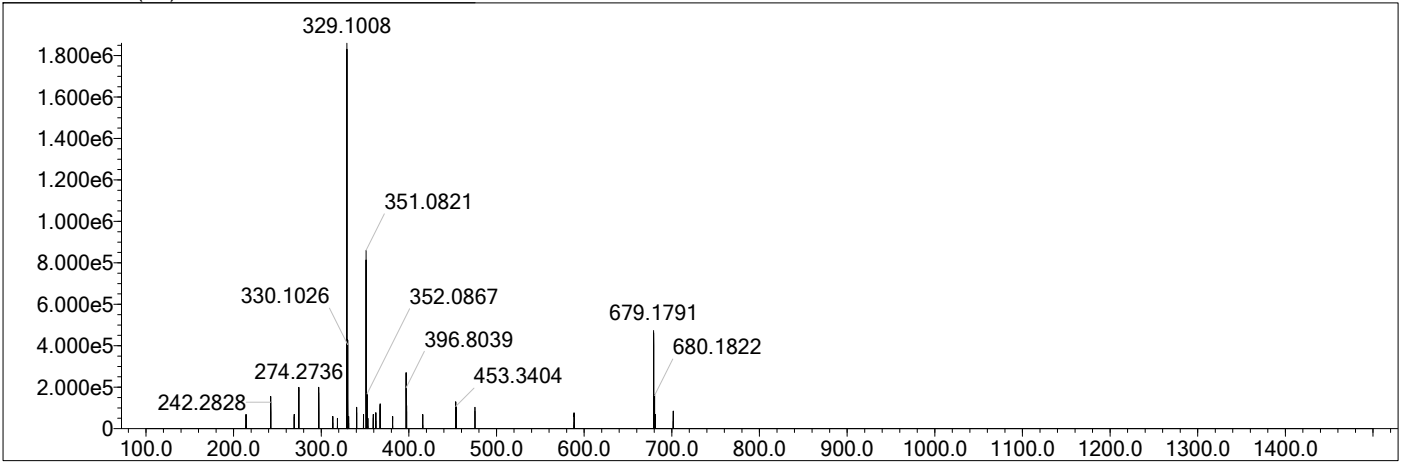

Measured region for 329.1008 m/z

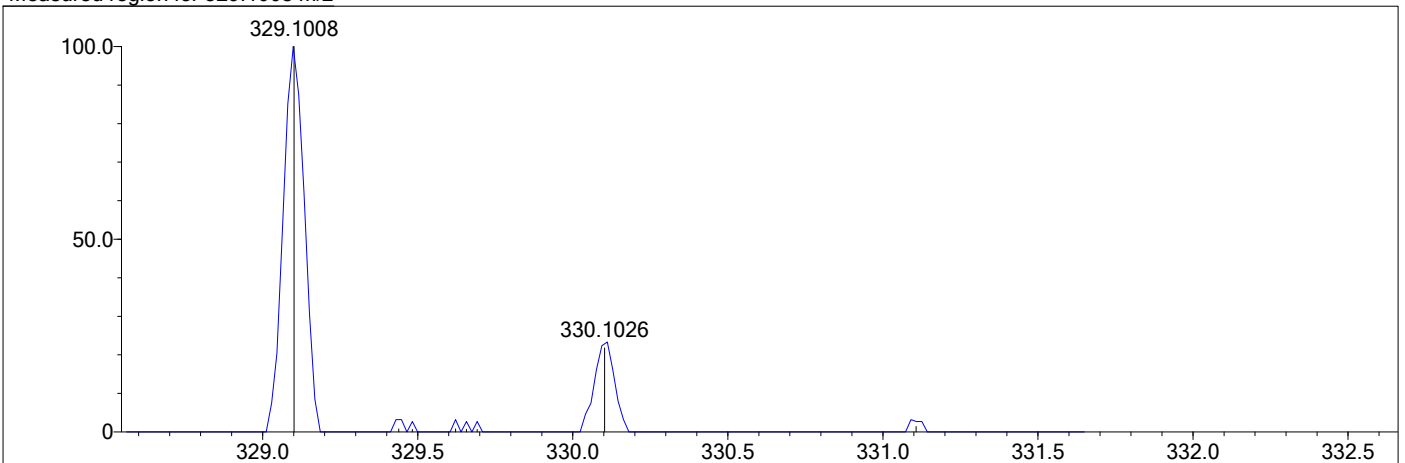

C18 H16 O6 [M+H]+ : Predicted region for 329.1020 m/z

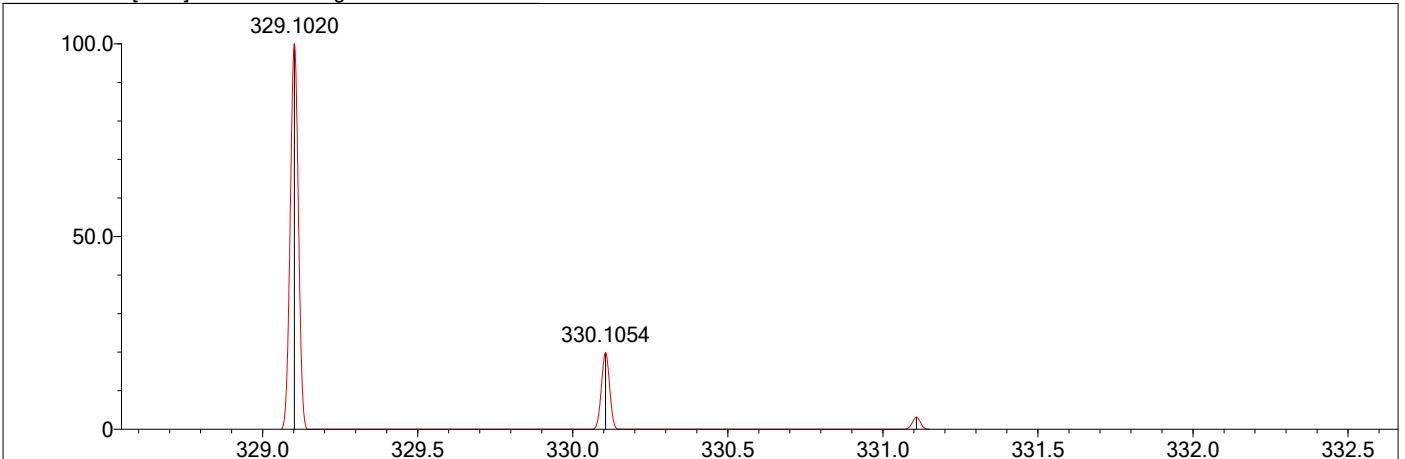

| Rank | Score | Formula (M) | Ion    | Meas. m/z | Pred. m/z | Df. (mDa) | Df. (ppm) | Iso   | DBE  |
|------|-------|-------------|--------|-----------|-----------|-----------|-----------|-------|------|
| 2    | 71.16 | C18 H16 O6  | [M+H]+ | 329.1008  | 329.1020  | -1.2      | -3.65     | 76.21 | 11.0 |

Data File: \\Deep-20160624\id\data1\邹永\SXH\SJF-2F.lcd

| Elmt | Val. | Min | Max | Use Adduct |
|------|------|-----|-----|------|------|-----|-----|------|------|-----|-----|------|------|-----|-----|------------|
| H    | 1    | 0   | 80  | O    | 2    | 0   | 7   | K    | 1    | 0   | 0   | Pd   | 2    | 0   | 0   | H          |
| 2H   | 1    | 0   | 0   | F    | 1    | 0   | 0   | Mn   | 3    | 0   | 0   | I    | 3    | 0   | 0   | Na         |
| 3H   | 1    | 0   | 0   | Si   | 4    | 0   | 0   | Fe   | 2    | 0   | 0   | Pt   | 2    | 0   | 0   | K          |
| B    | 3    | 0   | 0   | P    | 3    | 0   | 0   | Cu   | 2    | 0   | 0   | Au   | 1    | 0   | 0   |            |
| C    | 4    | 0   | 30  | S    | 2    | 0   | 0   | Se   | 2    | 0   | 0   |      |      |     |     |            |
| N    | 3    | 0   | 8   | Cl   | 1    | 0   | 0   | Br   | 1    | 0   | 0   |      |      |     |     |            |

Error Margin (ppm): 50  
 HC Ratio: 0.0 - 20.0  
 Max Isotopes: all  
 MSn Iso RI (%): 75.00

DBE Range: -100.0 - 1000.0  
 Apply N Rule: yes  
 Isotope RI (%): 1.00  
 MSn Logic Mode: AND

Electron Ions: both  
 Use MSn Info: no  
 Isotope Res: 10000  
 Max Results: 2000

Event#: 1 MS(E+) Ret. Time: 0.200 Scan#: 31

2f

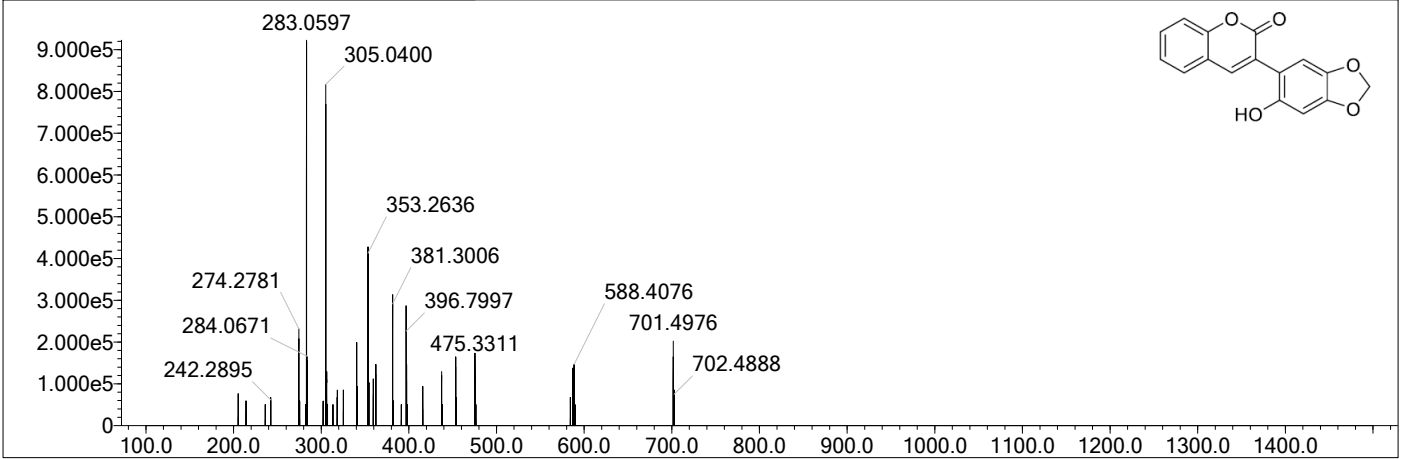

Measured region for 283.0597 m/z

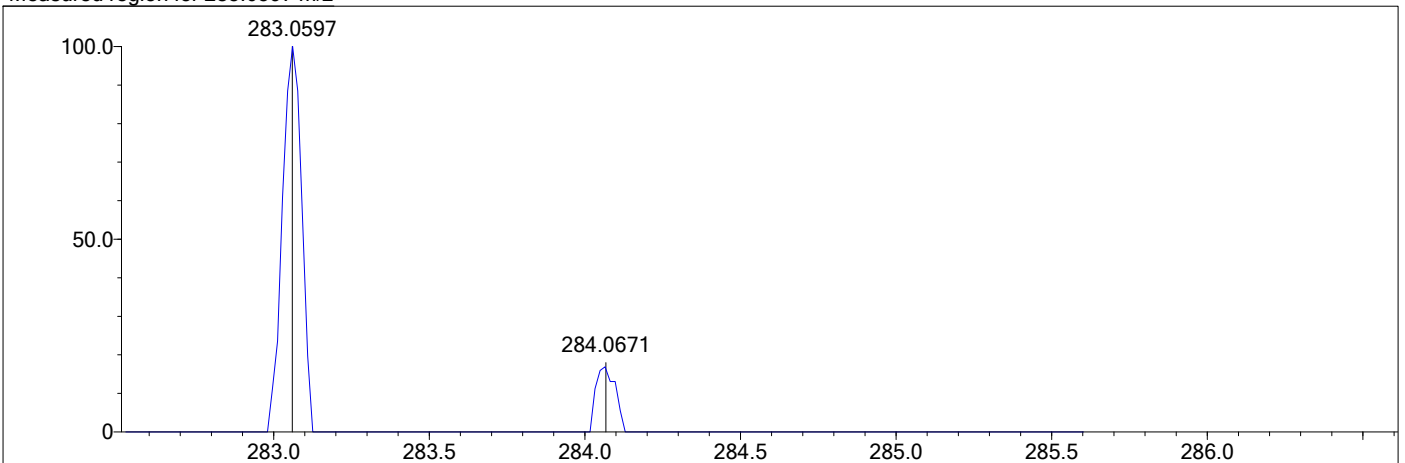

C16 H10 O5 [M+H]+ : Predicted region for 283.0601 m/z

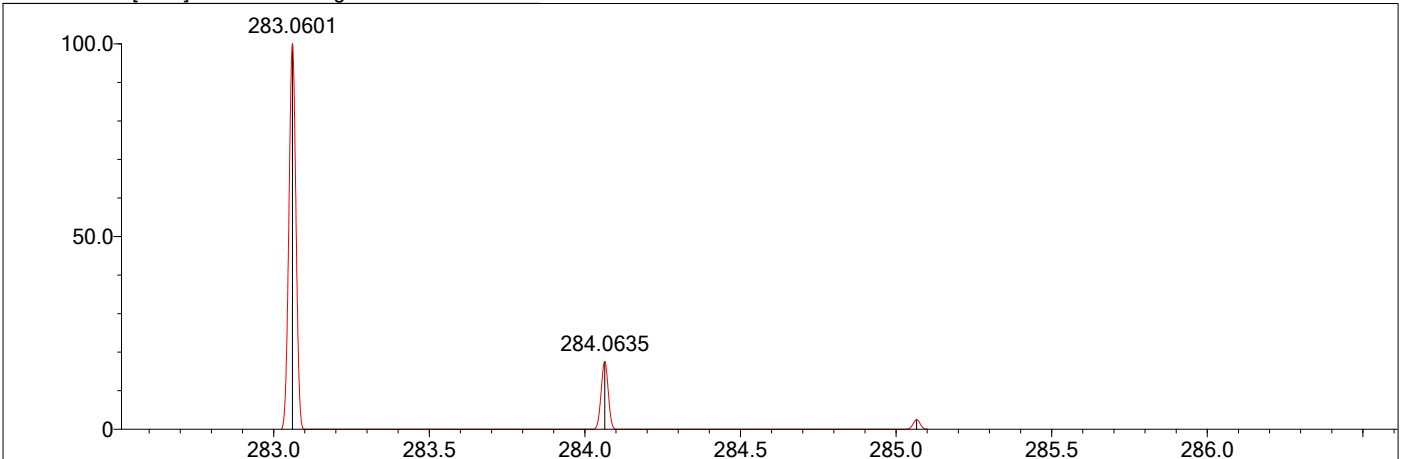

| Rank | Score | Formula (M) | Ion    | Meas. m/z | Pred. m/z | Df. (mDa) | Df. (ppm) | Iso   | DBE  |
|------|-------|-------------|--------|-----------|-----------|-----------|-----------|-------|------|
| 1    | 81.11 | C16 H10 O5  | [M+H]+ | 283.0597  | 283.0601  | -0.4      | -1.41     | 81.95 | 12.0 |

Data File: F:\高分辨数据\Zouyong\SXH\SJF-2G.lcd

| Elmt | Val. | Min | Max | Elmt | Val. | Min | Max | Elmt | Val. | Min | Max | Use Adduct |
|------|------|-----|-----|------|------|-----|-----|------|------|-----|-----|------------|
| H    | 1    | 0   | 12  | O    | 2    | 0   | 4   | Cl   | 1    | 0   | 0   | H          |
| B    | 3    | 0   | 0   | F    | 1    | 0   | 0   | Br   | 1    | 0   | 0   | Na         |
| C    | 4    | 0   | 19  | P    | 3    | 0   | 0   | I    | 3    | 0   | 0   | K          |
| N    | 3    | 0   | 0   | S    | 2    | 0   | 0   |      |      |     |     | NH4        |

Error Margin (ppm): 5  
 DBE Range: -1.0 - 1500.0  
 Electron Ions: both  
 HC Ratio: unlimited  
 Apply N Rule: no  
 Use MSn Info: no  
 Max Isotopes: all  
 Isotope RI (%): 1.00  
 Isotope Res: 10000  
 MSn Iso RI (%): 75.00  
 MSn Logic Mode: AND  
 Max Results: 40

Event#: 1 MS(E+) Ret. Time: 0.773 Scan#: 117

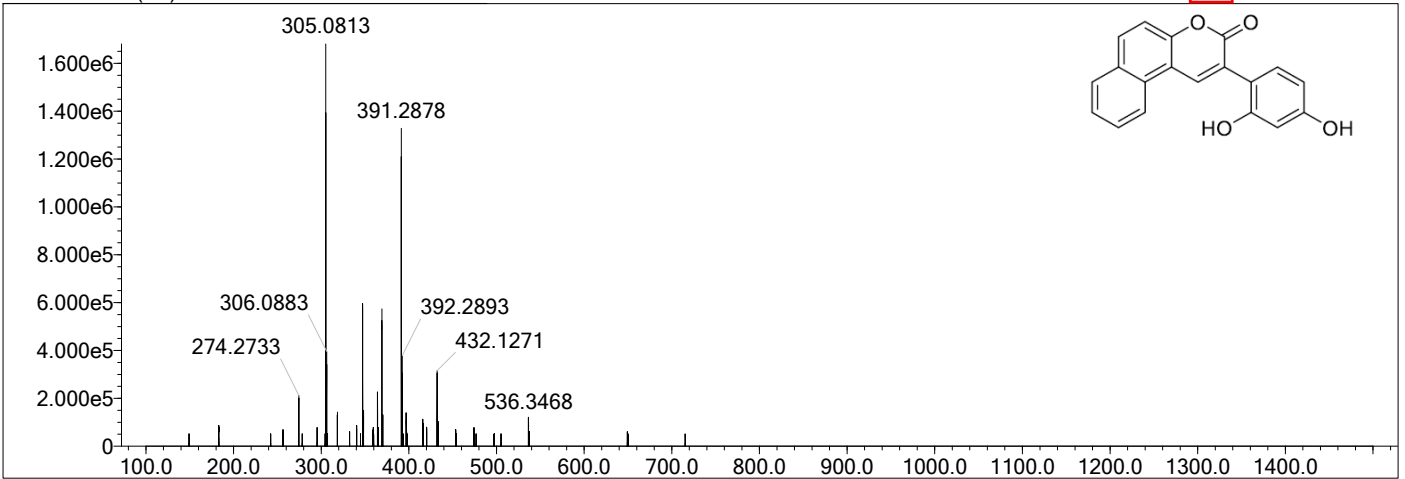

Measured region for 305.0813 m/z

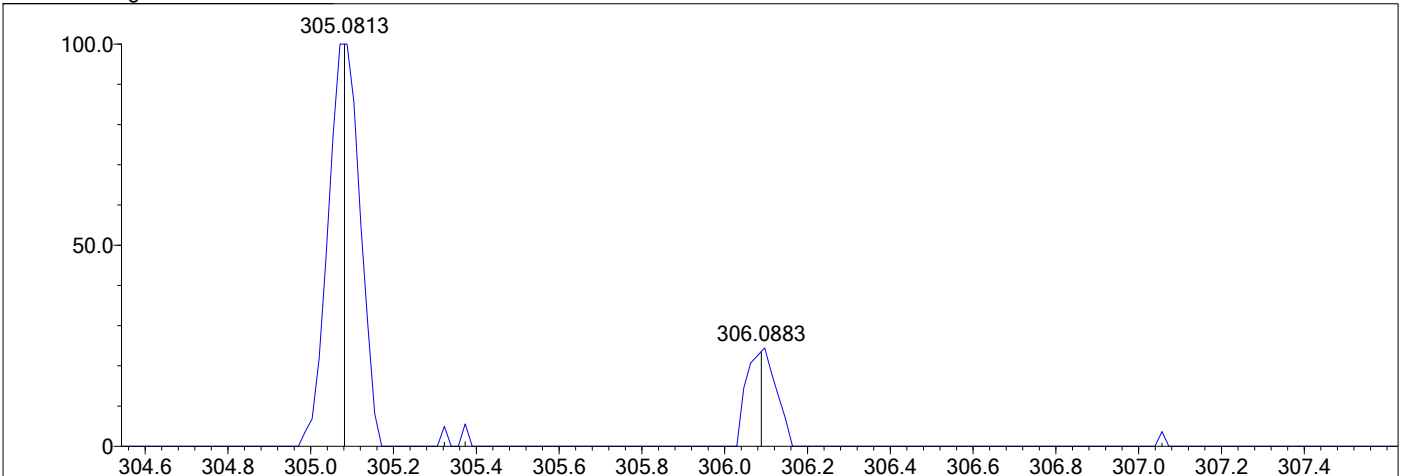

C19 H12 O4 [M+H]<sup>+</sup> : Predicted region for 305.0808 m/z

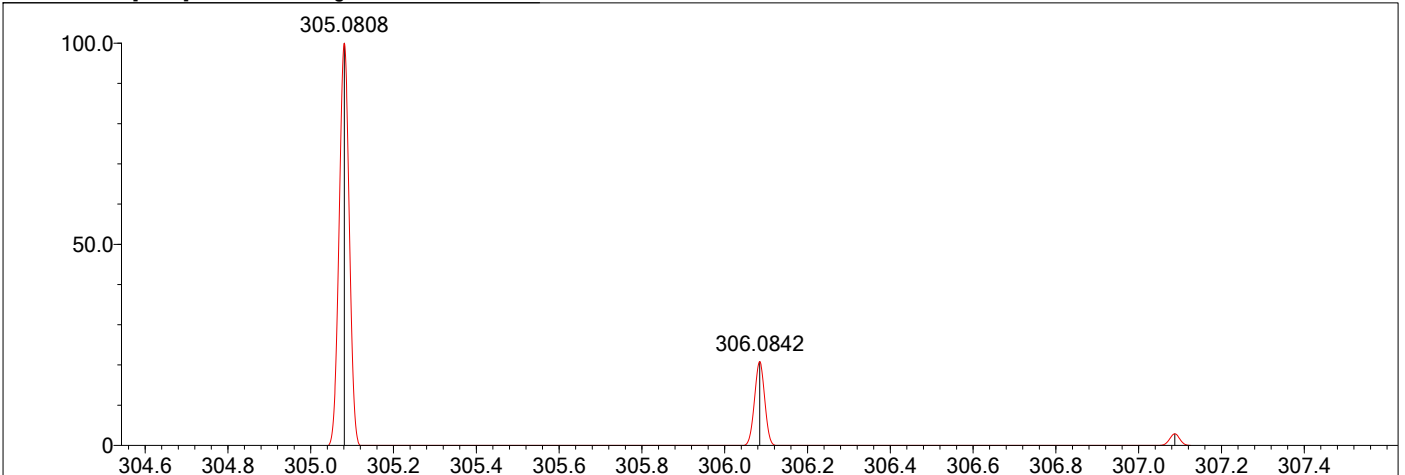

| Rank | Score | Formula (M) | Ion                | Meas. m/z | Pred. m/z | Df. (mDa) | Df. (ppm) | Iso   | DBE  |
|------|-------|-------------|--------------------|-----------|-----------|-----------|-----------|-------|------|
| 1    | 77.68 | C19 H12 O4  | [M+H] <sup>+</sup> | 305.0813  | 305.0808  | 0.5       | 1.64      | 78.95 | 14.0 |

Data File: F:\高分辨数据\Zouyong\SXH\SJF-2H.lcd

| Elmt | Val. | Min | Max | Elmt | Val. | Min | Max | Elmt | Val. | Min | Max | Use Adduct |
|------|------|-----|-----|------|------|-----|-----|------|------|-----|-----|------------|
| H    | 1    | 0   | 10  | O    | 2    | 0   | 4   | Cl   | 1    | 0   | 0   | H          |
| B    | 3    | 0   | 0   | F    | 1    | 0   | 0   | Br   | 1    | 0   | 0   | Na         |
| C    | 4    | 0   | 15  | P    | 3    | 0   | 0   | I    | 3    | 0   | 0   | K          |
| N    | 3    | 0   | 0   | S    | 2    | 0   | 0   |      |      |     |     | NH4        |

Error Margin (ppm): 5  
 HC Ratio: unlimited  
 Max Isotopes: all  
 MSn Iso RI (%): 75.00

DBE Range: -1.0 - 1500.0  
 Apply N Rule: no  
 Isotope RI (%): 1.00  
 MSn Logic Mode: AND

Electron Ions: both  
 Use MSn Info: no  
 Isotope Res: 10000  
 Max Results: 40

Event#: 1 MS(E+) Ret. Time : 0.747 Scan# : 113

2h

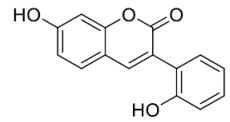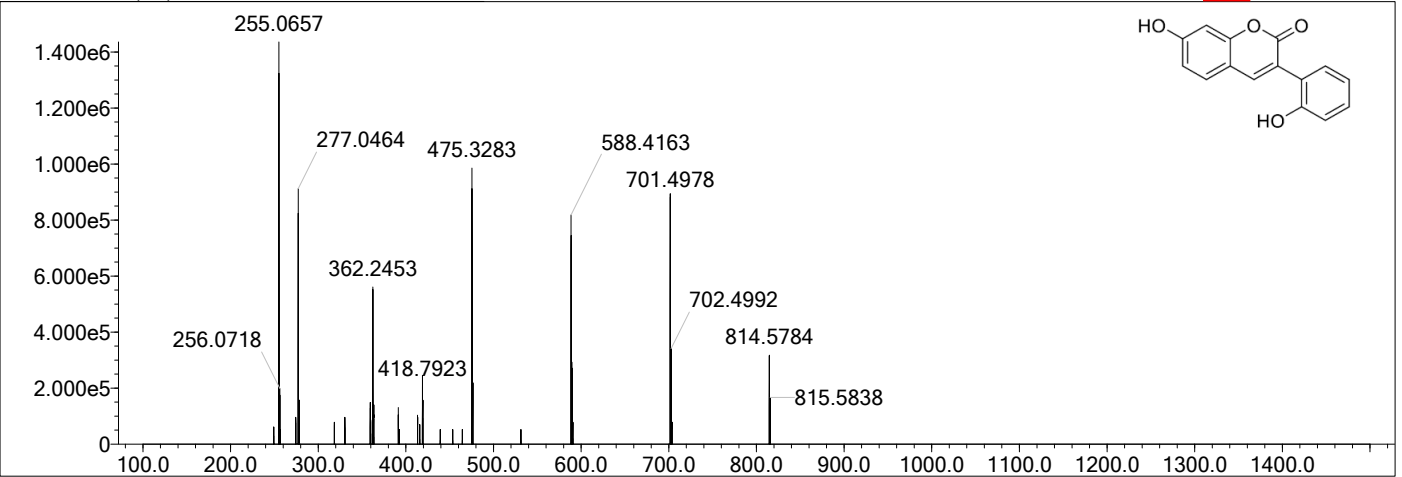

Measured region for 255.0657 m/z

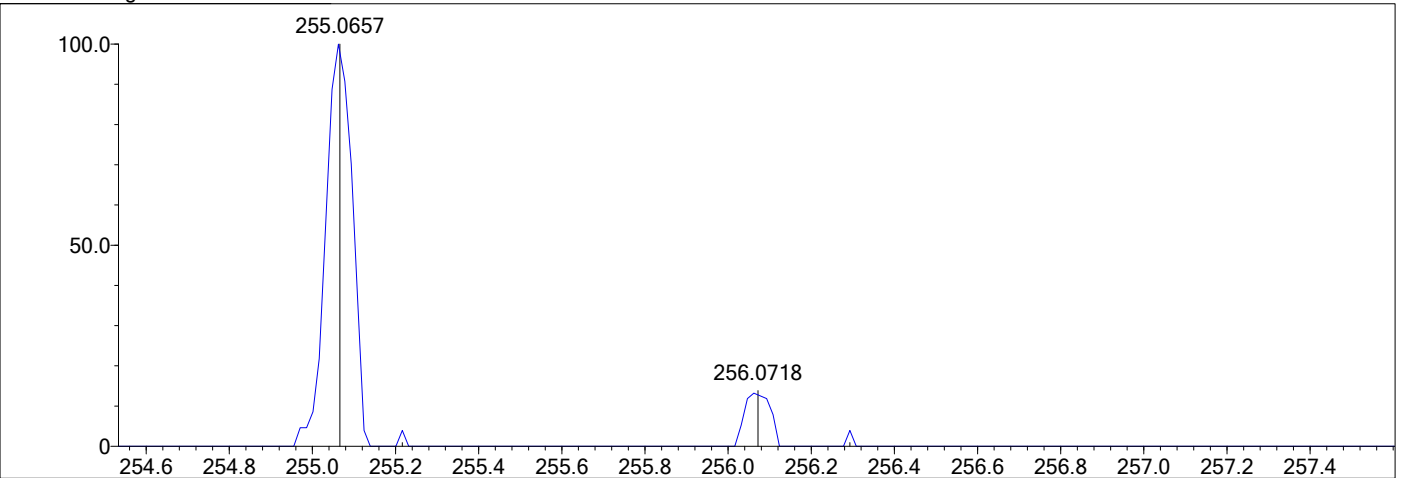

C15 H10 O4 [M+H]<sup>+</sup> : Predicted region for 255.0652 m/z

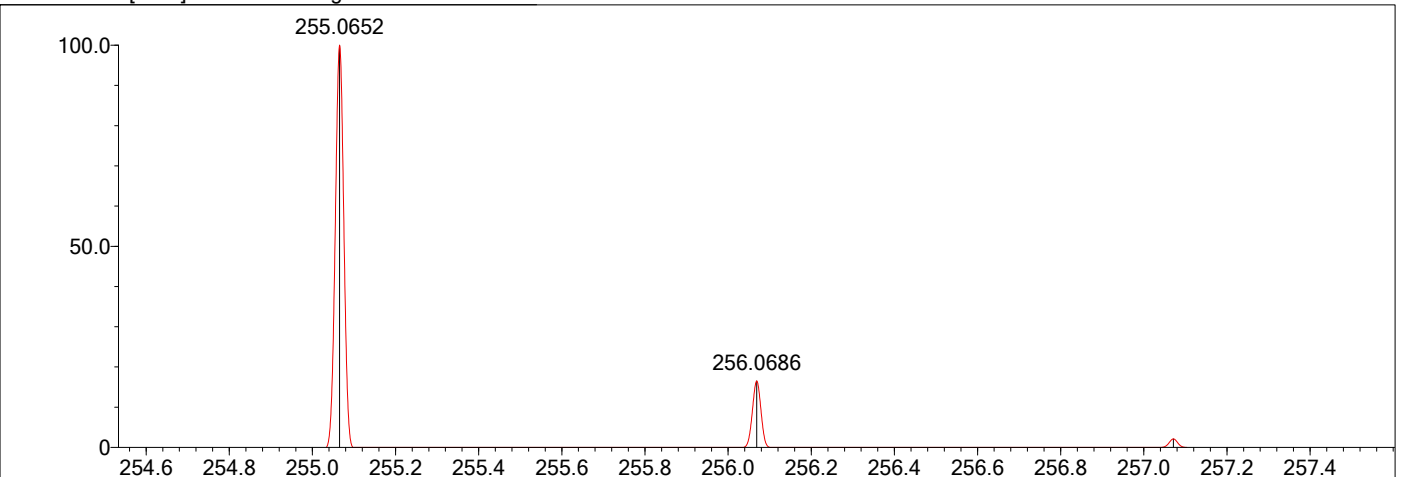

| Rank | Score | Formula (M) | Ion                | Meas. m/z | Pred. m/z | Df. (mDa) | Df. (ppm) | Iso   | DBE  |
|------|-------|-------------|--------------------|-----------|-----------|-----------|-----------|-------|------|
| 1    | 67.70 | C15 H10 O4  | [M+H] <sup>+</sup> | 255.0657  | 255.0652  | 0.5       | 1.96      | 69.36 | 11.0 |



Data File: F:\高分辨数据\Zouyong\SXH\SJF-2I.lcd

| Elmt | Val. | Min | Max | Elmt | Val. | Min | Max | Elmt | Val. | Min | Max | Use Adduct |
|------|------|-----|-----|------|------|-----|-----|------|------|-----|-----|------------|
| H    | 1    | 0   | 12  | O    | 2    | 0   | 5   | Cl   | 1    | 0   | 0   | H          |
| B    | 3    | 0   | 0   | F    | 1    | 0   | 0   | Br   | 1    | 0   | 0   | Na         |
| C    | 4    | 0   | 16  | P    | 3    | 0   | 0   | I    | 3    | 0   | 0   | K          |
| N    | 3    | 0   | 0   | S    | 2    | 0   | 0   |      |      |     |     | NH4        |

Error Margin (ppm): 5  
 HC Ratio: unlimited  
 Max Isotopes: all  
 MSn Iso RI (%): 75.00

DBE Range: -1.0 - 1500.0  
 Apply N Rule: no  
 Isotope RI (%): 1.00  
 MSn Logic Mode: AND

Electron Ions: both  
 Use MSn Info: no  
 Isotope Res: 10000  
 Max Results: 40

Event#: 1 MS(E+) Ret. Time : 0.707 Scan# : 107

2i

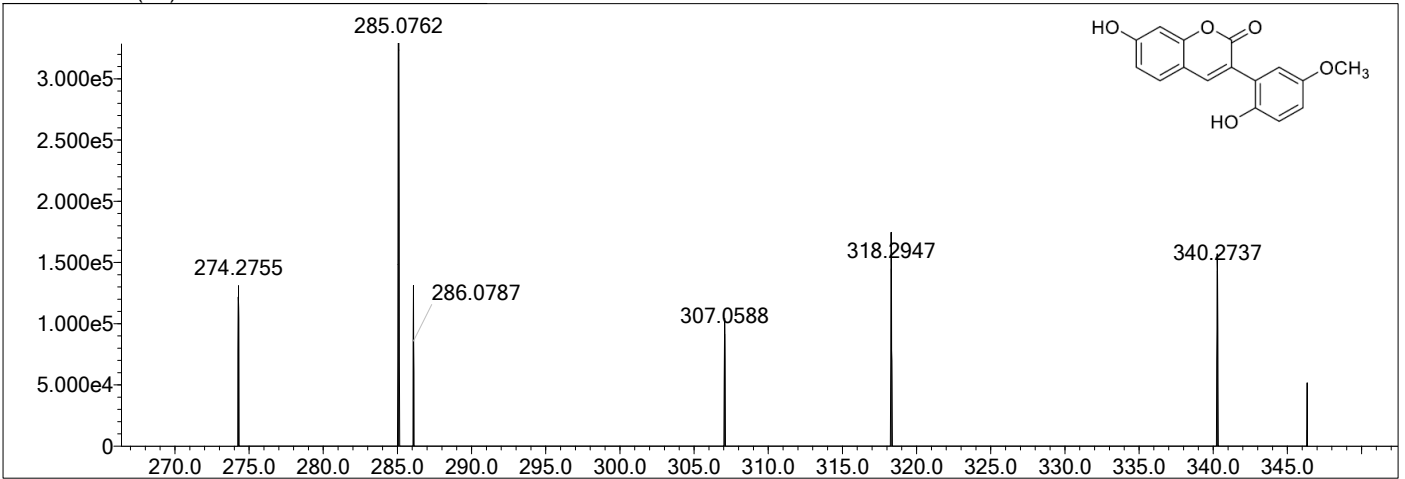

Measured region for 285.0762 m/z

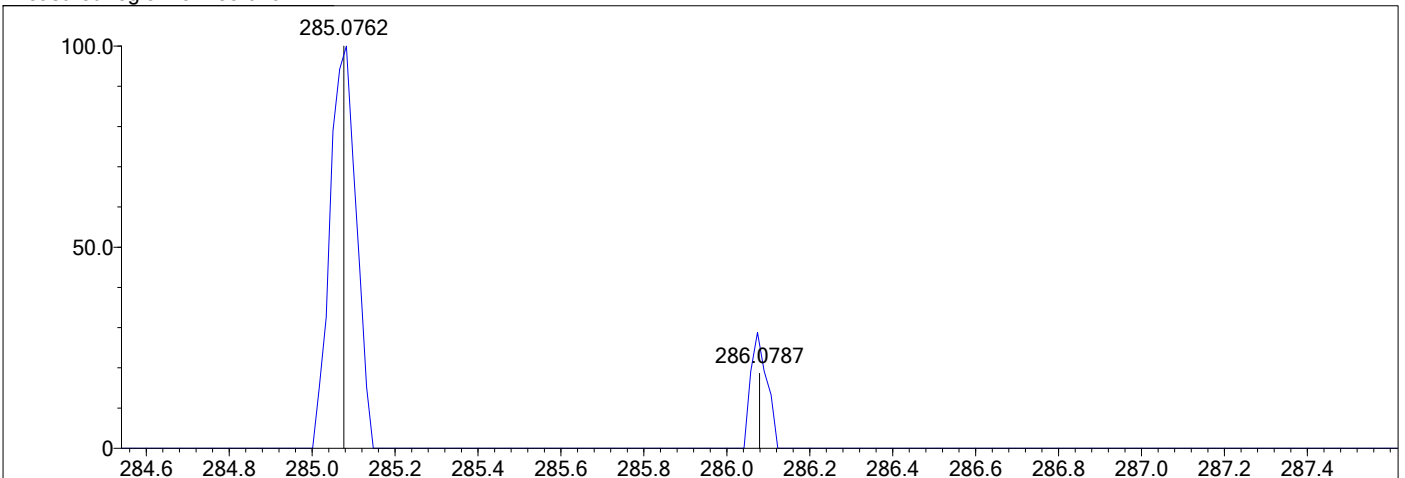

C16 H12 O5 [M+H]<sup>+</sup> : Predicted region for 285.0758 m/z

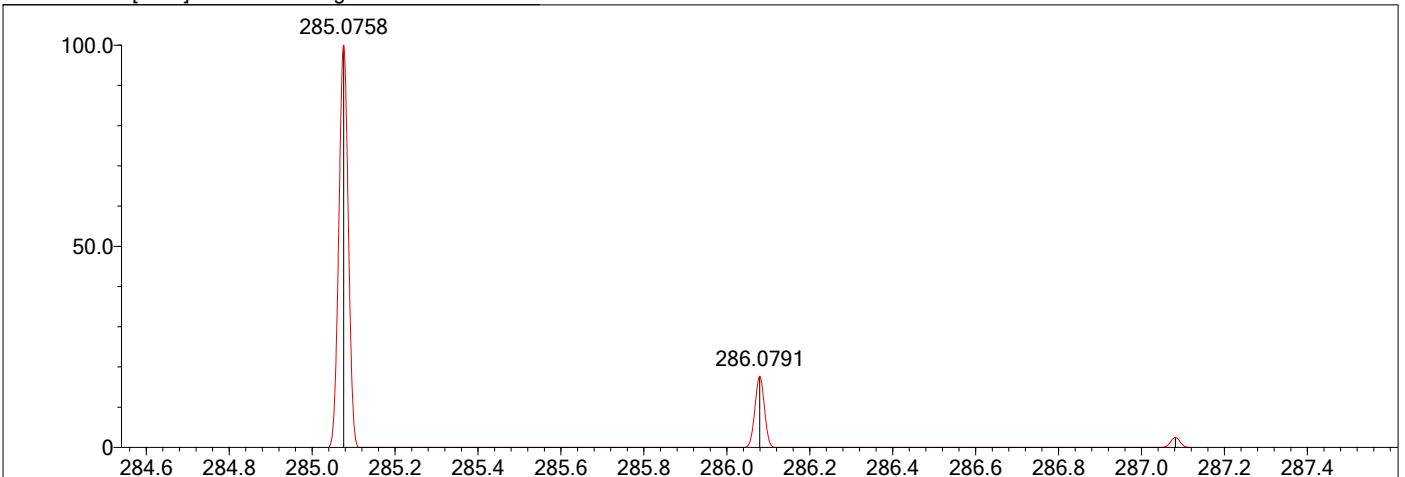

| Rank | Score | Formula (M) | Ion                | Meas. m/z | Pred. m/z | Df. (mDa) | Df. (ppm) | Iso   | DBE  |
|------|-------|-------------|--------------------|-----------|-----------|-----------|-----------|-------|------|
| 1    | 53.16 | C16 H12 O5  | [M+H] <sup>+</sup> | 285.0762  | 285.0758  | 0.4       | 1.40      | 53.70 | 11.0 |

Data File: \\Deep-20160624\data1\邹永\SXH\SJF-2J.lcd

| Elmt | Val. | Min | Max | Use Adduct |
|------|------|-----|-----|------|------|-----|-----|------|------|-----|-----|------|------|-----|-----|------------|
| H    | 1    | 0   | 80  | O    | 2    | 0   | 7   | K    | 1    | 0   | 0   | Pd   | 2    | 0   | 0   | H          |
| 2H   | 1    | 0   | 0   | F    | 1    | 0   | 0   | Mn   | 3    | 0   | 0   | I    | 3    | 0   | 0   | Na         |
| 3H   | 1    | 0   | 0   | Si   | 4    | 0   | 0   | Fe   | 2    | 0   | 0   | Pt   | 2    | 0   | 0   | K          |
| B    | 3    | 0   | 0   | P    | 3    | 0   | 0   | Cu   | 2    | 0   | 0   | Au   | 1    | 0   | 0   |            |
| C    | 4    | 0   | 30  | S    | 2    | 0   | 0   | Se   | 2    | 0   | 0   |      |      |     |     |            |
| N    | 3    | 0   | 8   | Cl   | 1    | 0   | 0   | Br   | 1    | 0   | 0   |      |      |     |     |            |

Error Margin (ppm): 50  
 HC Ratio: 0.0 - 20.0  
 Max Isotopes: all  
 MSn Iso RI (%): 75.00

DBE Range: -100.0 - 1000.0  
 Apply N Rule: yes  
 Isotope RI (%): 1.00  
 MSn Logic Mode: AND

Electron Ions: both  
 Use MSn Info: no  
 Isotope Res: 10000  
 Max Results: 2000

Event#: 1 MS(E+) Ret. Time : 0.120 Scan# : 19

2j

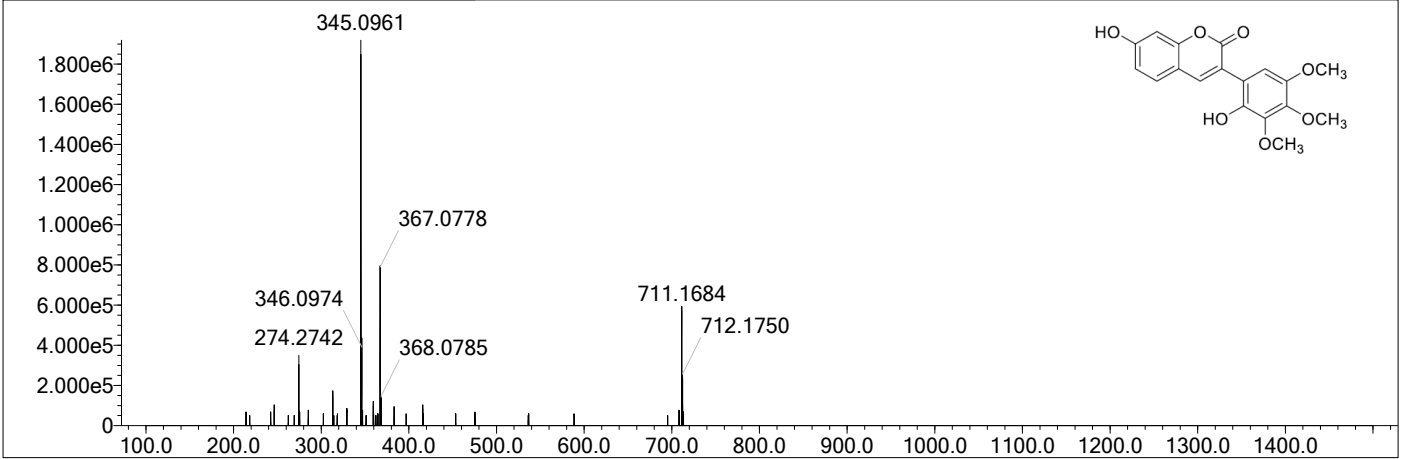

Measured region for 345.0961 m/z

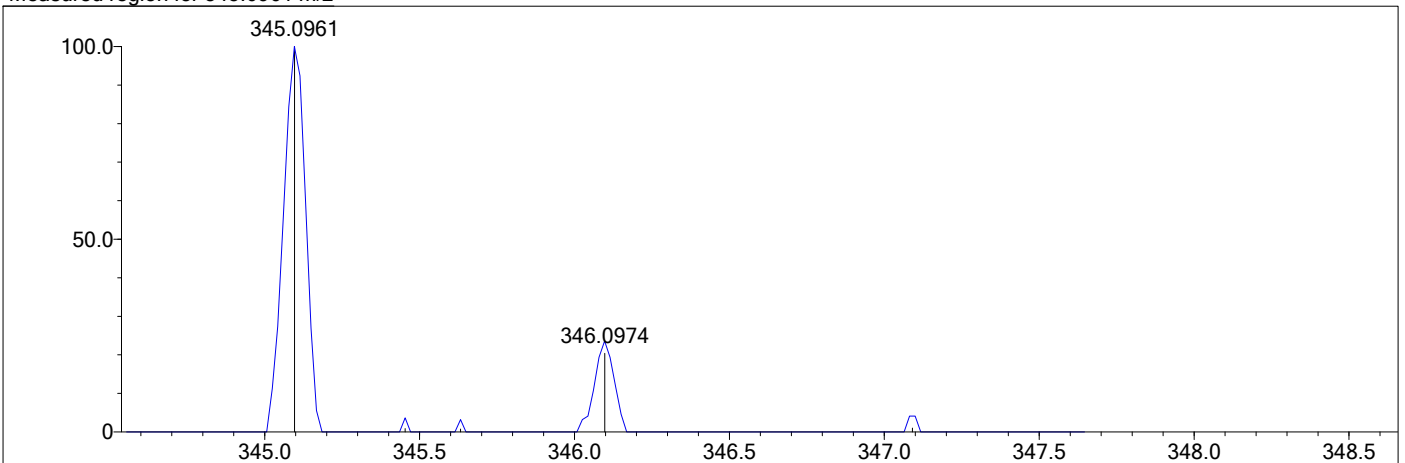

C18 H16 O7 [M+H]+ : Predicted region for 345.0969 m/z

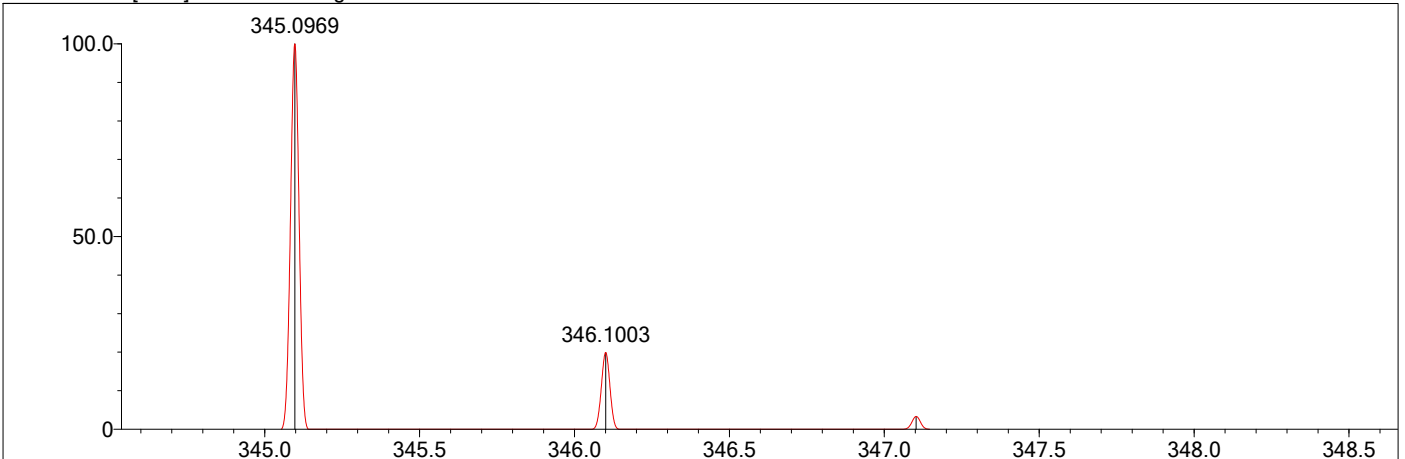

| Rank | Score | Formula (M) | Ion    | Meas. m/z | Pred. m/z | Df. (mDa) | Df. (ppm) | Iso   | DBE  |
|------|-------|-------------|--------|-----------|-----------|-----------|-----------|-------|------|
| 2    | 64.41 | C18 H16 O7  | [M+H]+ | 345.0961  | 345.0969  | -0.8      | -2.32     | 66.60 | 11.0 |

Data File: F:\高分辨数据\Zouyong\SXH\SJF-2K.Icd

| Elmt | Val. | Min | Max | Elmt | Val. | Min | Max | Elmt | Val. | Min | Max | Use Adduct |
|------|------|-----|-----|------|------|-----|-----|------|------|-----|-----|------------|
| H    | 1    | 0   | 12  | O    | 2    | 0   | 3   | Cl   | 1    | 0   | 0   | H          |
| B    | 3    | 0   | 0   | F    | 1    | 0   | 0   | Br   | 1    | 0   | 0   | Na         |
| C    | 4    | 0   | 16  | P    | 3    | 0   | 0   | I    | 3    | 0   | 0   | K          |
| N    | 3    | 0   | 0   | S    | 2    | 0   | 0   |      |      |     |     | NH4        |

Error Margin (ppm): 5  
 HC Ratio: unlimited  
 Max Isotopes: all  
 MSn Iso RI (%): 75.00

DBE Range: -1.0 - 1500.0  
 Apply N Rule: no  
 Isotope RI (%): 1.00  
 MSn Logic Mode: AND

Electron Ions: both  
 Use MSn Info: no  
 Isotope Res: 10000  
 Max Results: 40

Event#: 1 MS(E+) Ret. Time : 0.853 Scan#: 129

2k

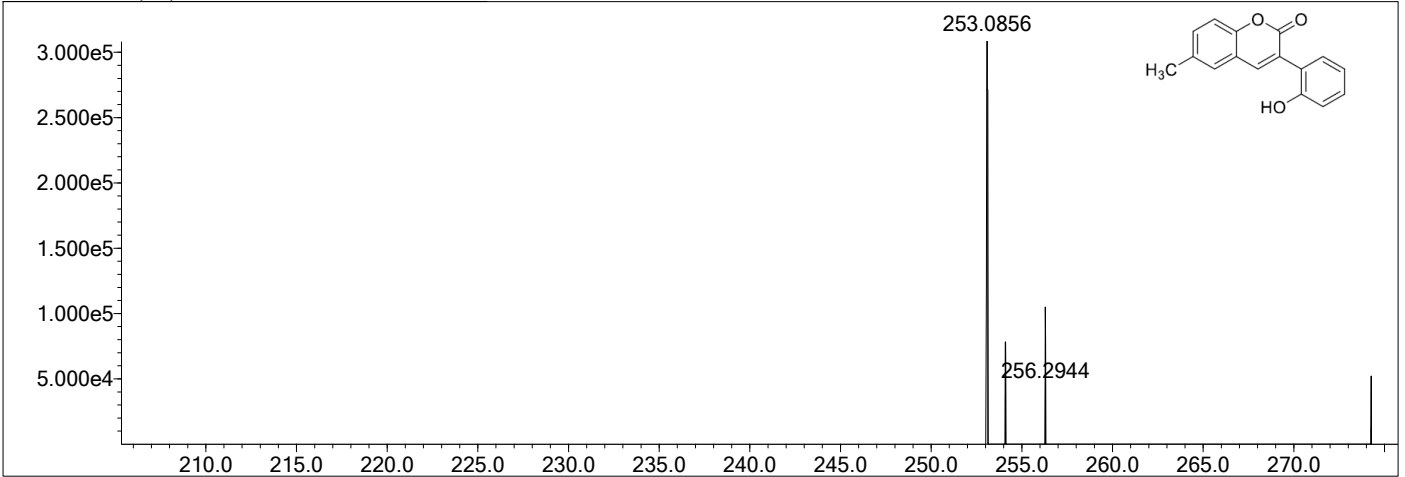

Measured region for 253.0856 m/z

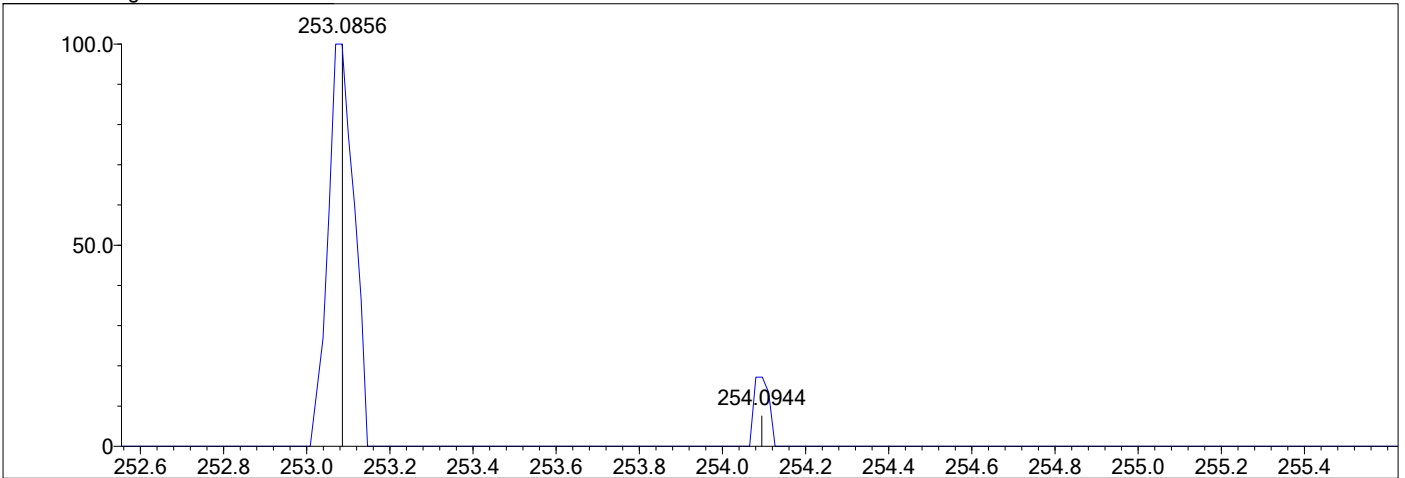

C16 H12 O3 [M+H]<sup>+</sup> : Predicted region for 253.0859 m/z

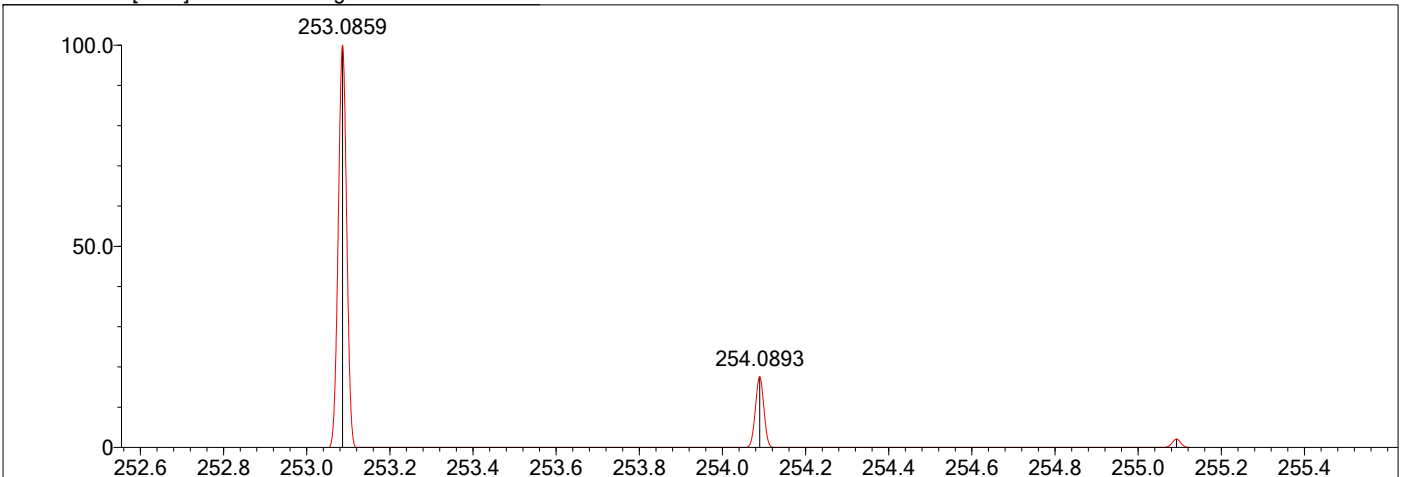

| Rank | Score | Formula (M) | Ion                | Meas. m/z | Pred. m/z | Df. (mDa) | Df. (ppm) | Iso   | DBE  |
|------|-------|-------------|--------------------|-----------|-----------|-----------|-----------|-------|------|
| 1    | 73.36 | C16 H12 O3  | [M+H] <sup>+</sup> | 253.0856  | 253.0859  | -0.3      | -1.19     | 73.71 | 11.0 |

Data File: F:\高分辨数据\Zouyong\SXH\SJF-2L.lcd

| Elmt | Val. | Min | Max | Elmt | Val. | Min | Max | Elmt | Val. | Min | Max | Use Adduct |
|------|------|-----|-----|------|------|-----|-----|------|------|-----|-----|------------|
| H    | 1    | 0   | 12  | O    | 2    | 0   | 4   | Cl   | 1    | 0   | 0   | H          |
| B    | 3    | 0   | 0   | F    | 1    | 0   | 0   | Br   | 1    | 0   | 0   | Na         |
| C    | 4    | 0   | 16  | P    | 3    | 0   | 0   | I    | 3    | 0   | 0   | K          |
| N    | 3    | 0   | 0   | S    | 2    | 0   | 0   |      |      |     |     | NH4        |

Error Margin (ppm): 5  
 HC Ratio: unlimited  
 Max Isotopes: all  
 MSn Iso RI (%): 75.00

DBE Range: -1.0 - 1500.0  
 Apply N Rule: no  
 Isotope RI (%): 1.00  
 MSn Logic Mode: AND

Electron Ions: both  
 Use MSn Info: no  
 Isotope Res: 10000  
 Max Results: 40

Event#: 1 MS(E+) Ret. Time : 0.840 Scan# : 127

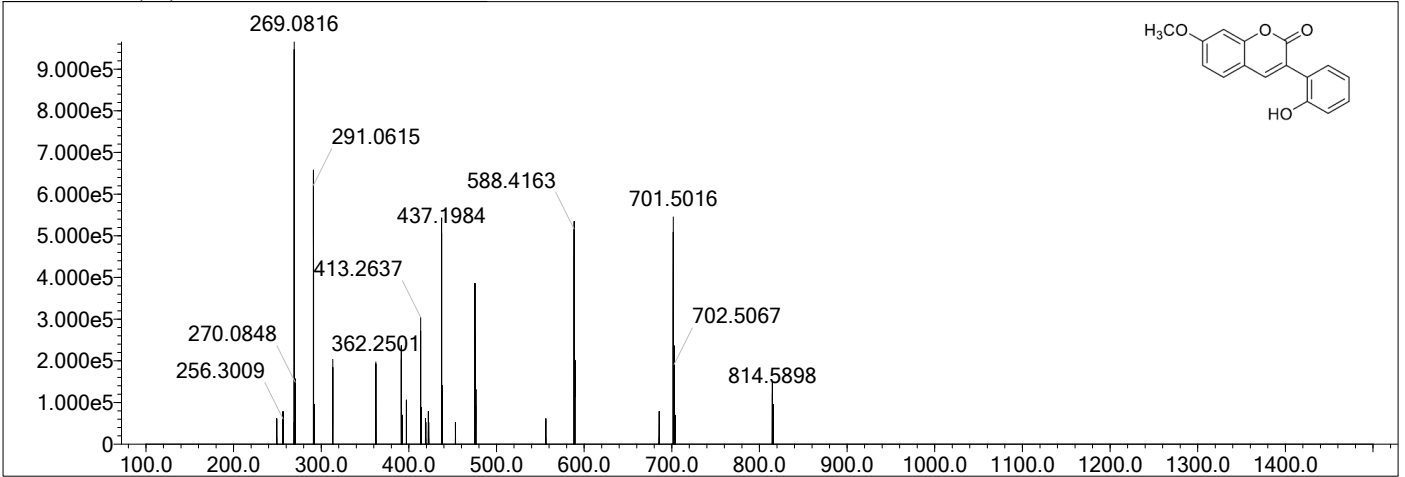

Measured region for 269.0816 m/z

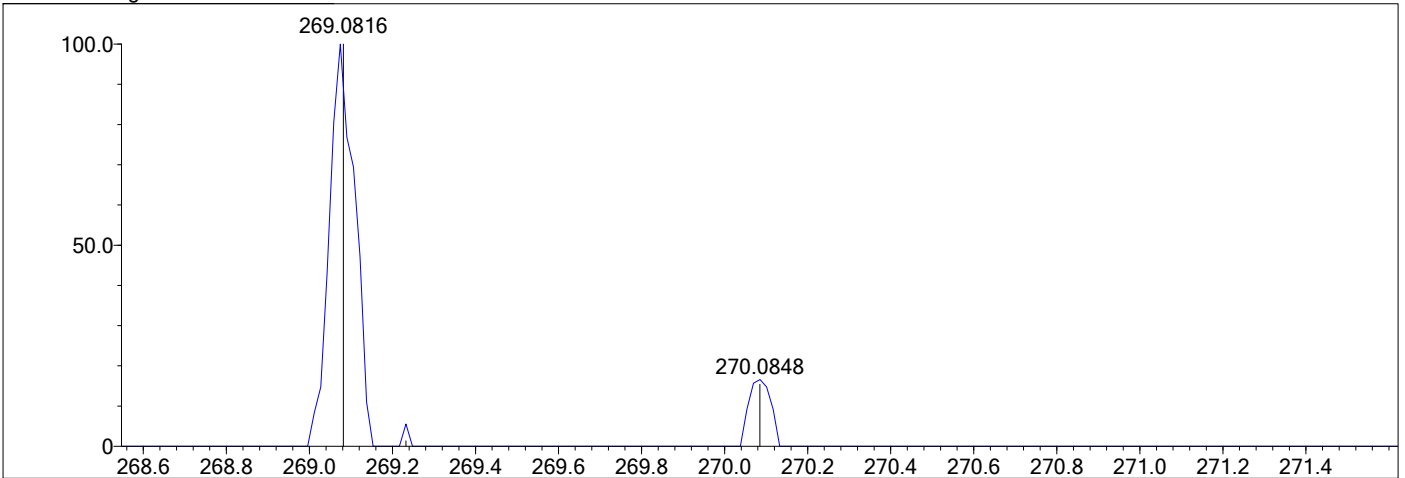

C16 H12 O4 [M+H]<sup>+</sup> : Predicted region for 269.0808 m/z

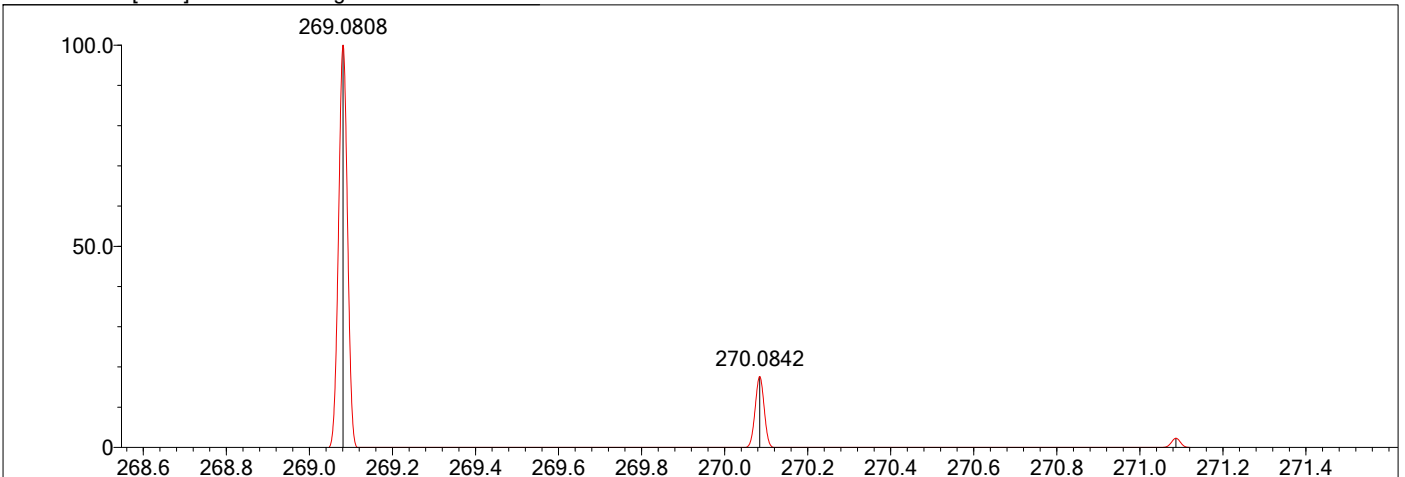

| Rank | Score | Formula (M) | Ion                | Meas. m/z | Pred. m/z | Df. (mDa) | Df. (ppm) | Iso   | DBE  |
|------|-------|-------------|--------------------|-----------|-----------|-----------|-----------|-------|------|
| 1    | 48.37 | C16 H12 O4  | [M+H] <sup>+</sup> | 269.0816  | 269.0808  | 0.8       | 2.97      | 50.87 | 11.0 |

Data File: F:\高分辨数据\Zouyong\SXH\SJF-2M.lcd

| Elmt | Val. | Min | Max | Elmt | Val. | Min | Max | Elmt | Val. | Min | Max | Use Adduct |
|------|------|-----|-----|------|------|-----|-----|------|------|-----|-----|------------|
| H    | 1    | 0   | 9   | O    | 2    | 0   | 3   | Cl   | 1    | 0   | 1   | H          |
| B    | 3    | 0   | 0   | F    | 1    | 0   | 0   | Br   | 1    | 0   | 0   | HCOO       |
| C    | 4    | 0   | 15  | P    | 3    | 0   | 0   | I    | 3    | 0   | 0   | CH3COO     |
| N    | 3    | 0   | 0   | S    | 2    | 0   | 0   |      |      |     |     | Cl         |

Error Margin (ppm): 5  
 HC Ratio: unlimited  
 Max Isotopes: all  
 MSn Iso RI (%): 75.00

DBE Range: -1.0 - 1500.0  
 Apply N Rule: no  
 Isotope RI (%): 1.00  
 MSn Logic Mode: AND

Electron Ions: both  
 Use MSn Info: no  
 Isotope Res: 10000  
 Max Results: 40

Event#: 2 MS(E-) Ret. Time : 0.987 Scan#: 150

2m

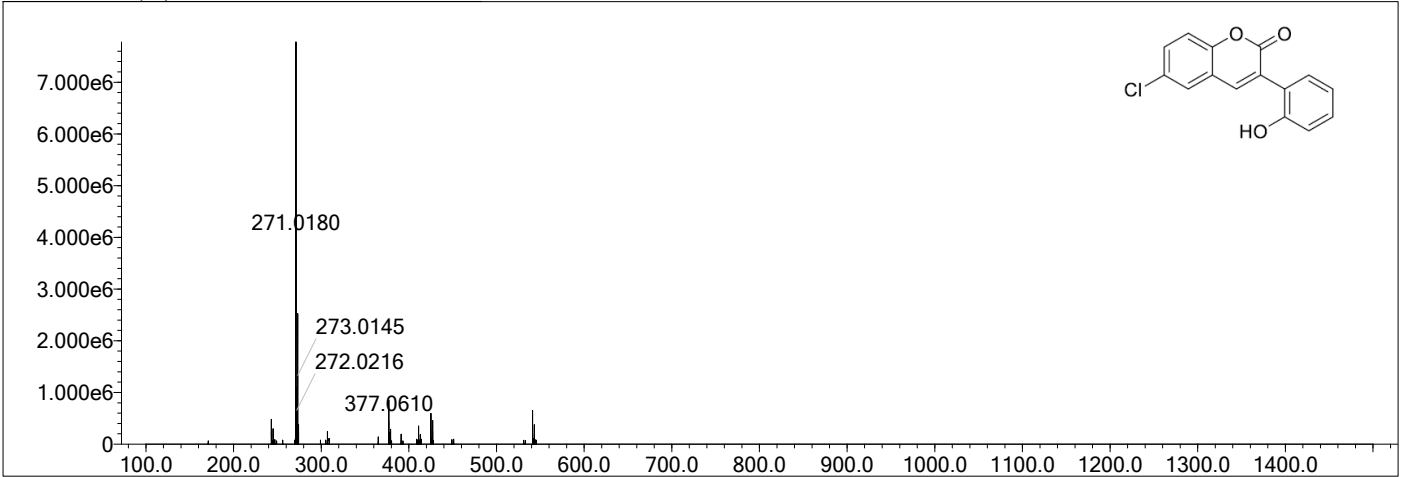

Measured region for 271.0180 m/z

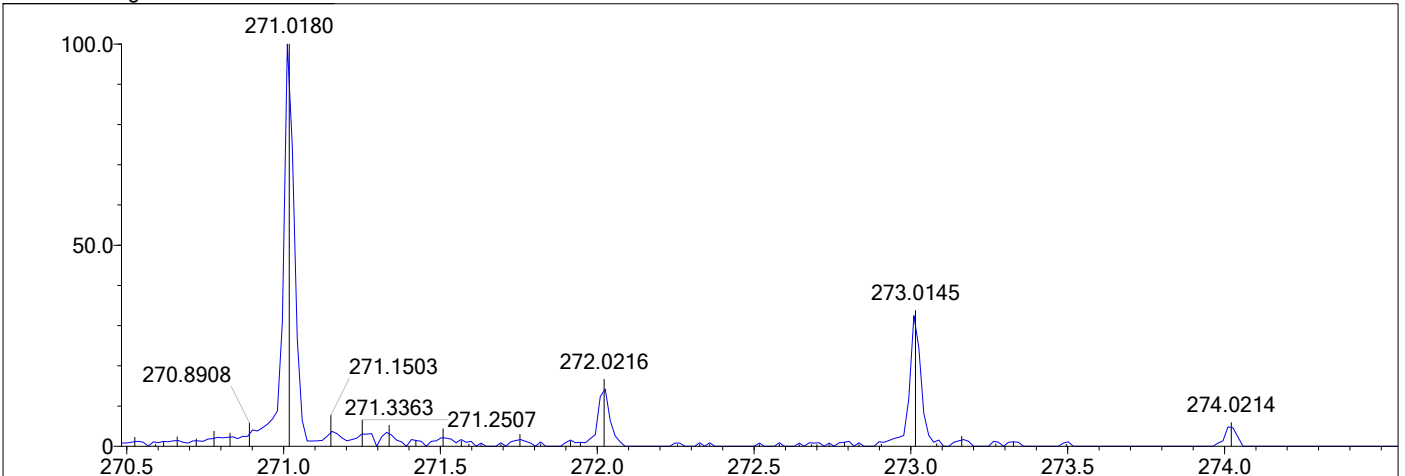

C15 H9 O3 Cl [M-H]-: Predicted region for 271.0167 m/z

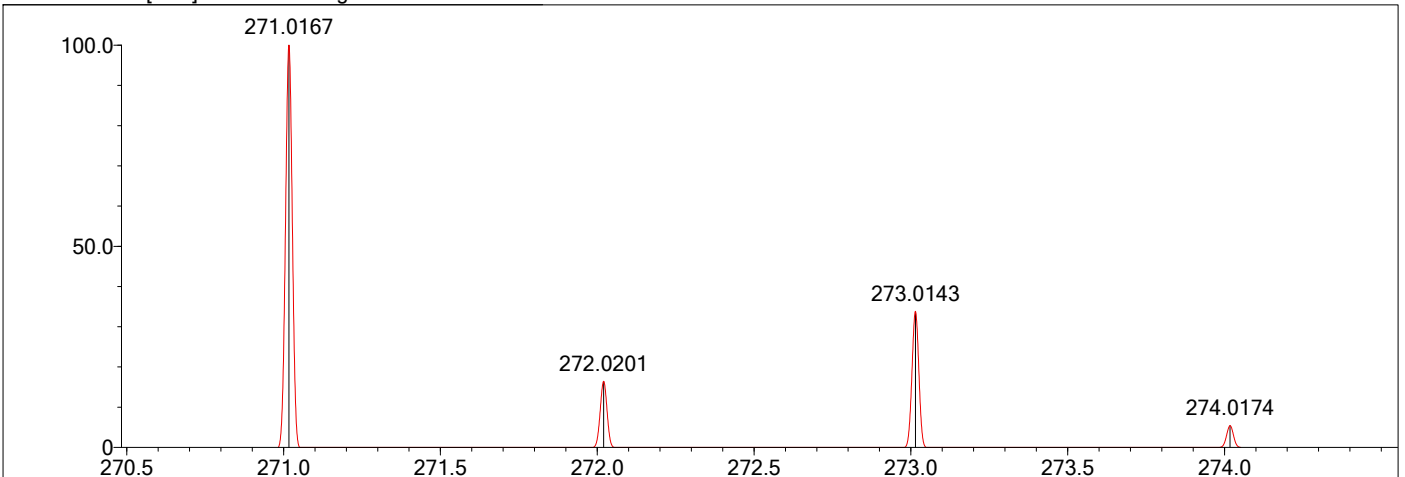

| Rank | Score | Formula (M)  | Ion    | Meas. m/z | Pred. m/z | Df. (mDa) | Df. (ppm) | Iso   | DBE  |
|------|-------|--------------|--------|-----------|-----------|-----------|-----------|-------|------|
| 1    | 64.06 | C15 H9 O3 Cl | [M-H]- | 271.0180  | 271.0167  | 1.3       | 4.80      | 70.78 | 11.0 |

Data File: \\Deep-20160624\data1\邹永\SXH\SJF-2N.Icd

| Elmt | Val. | Min | Max | Use Adduct |
|------|------|-----|-----|------|------|-----|-----|------|------|-----|-----|------|------|-----|-----|------------|
| H    | 1    | 0   | 80  | O    | 2    | 0   | 7   | K    | 1    | 0   | 0   | Pd   | 2    | 0   | 0   | H          |
| 2H   | 1    | 0   | 0   | F    | 1    | 0   | 0   | Mn   | 3    | 0   | 0   | I    | 3    | 0   | 0   | Na         |
| 3H   | 1    | 0   | 0   | Si   | 4    | 0   | 0   | Fe   | 2    | 0   | 0   | Pt   | 2    | 0   | 0   | K          |
| B    | 3    | 0   | 0   | P    | 3    | 0   | 0   | Cu   | 2    | 0   | 0   | Au   | 1    | 0   | 0   |            |
| C    | 4    | 0   | 30  | S    | 2    | 0   | 0   | Se   | 2    | 0   | 0   |      |      |     |     |            |
| N    | 3    | 0   | 8   | Cl   | 1    | 0   | 0   | Br   | 1    | 0   | 0   |      |      |     |     |            |

Error Margin (ppm): 50  
 HC Ratio: 0.0 - 20.0  
 Max Isotopes: all  
 MSn Iso RI (%): 75.00

DBE Range: -100.0 - 1000.0  
 Apply N Rule: yes  
 Isotope RI (%): 1.00  
 MSn Logic Mode: AND

Electron Ions: both  
 Use MSn Info: no  
 Isotope Res: 10000  
 Max Results: 2000

Event#: 1 MS(E+) Ret. Time : 0.147 Scan#: 23

2n

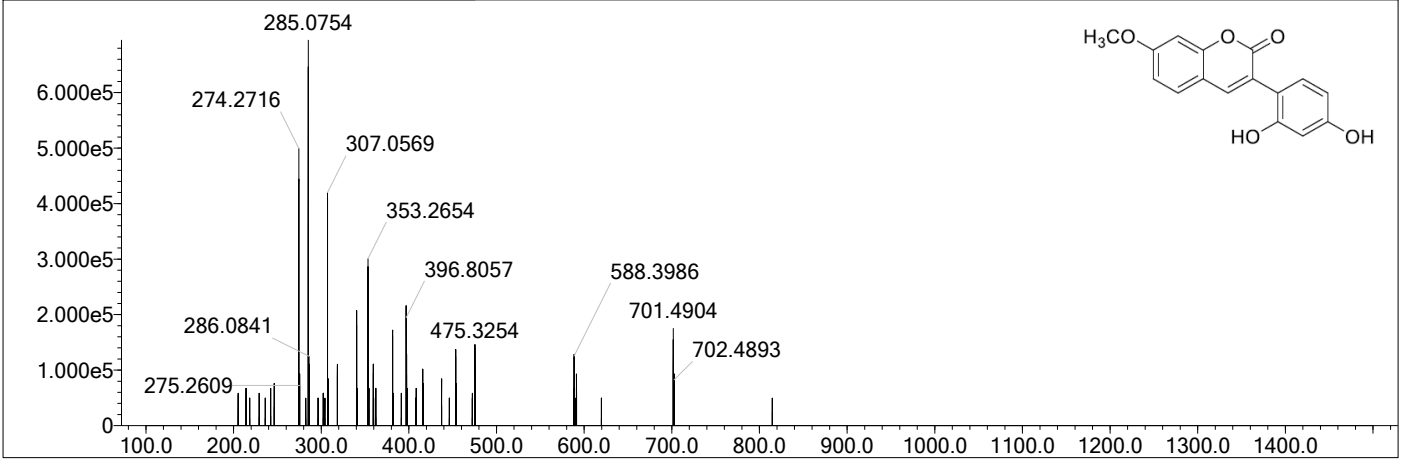

Measured region for 285.0754 m/z

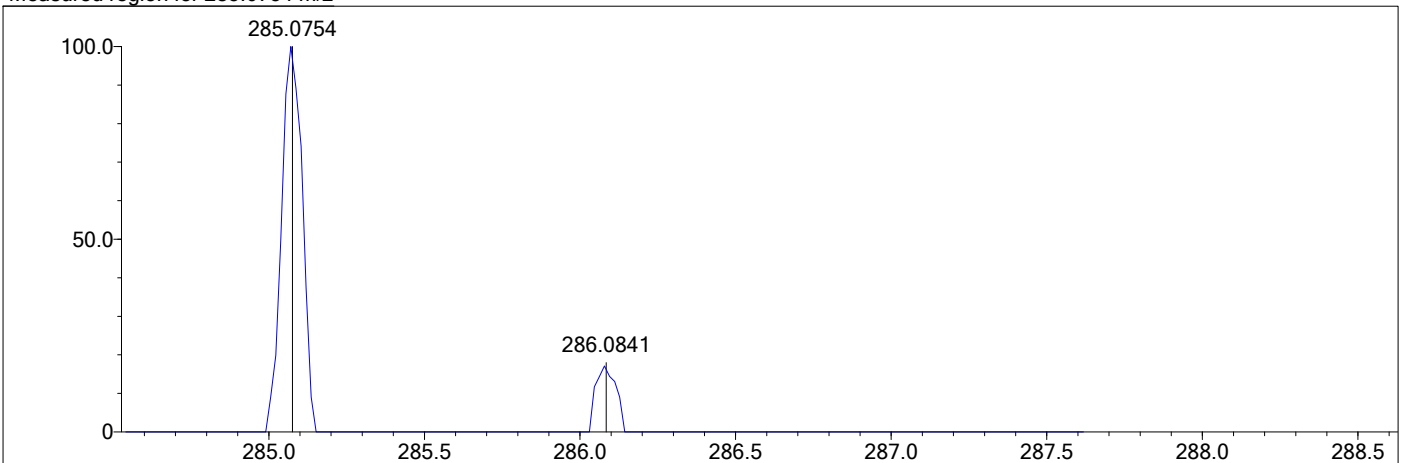

C16 H12 O5 [M+H]+ : Predicted region for 285.0758 m/z

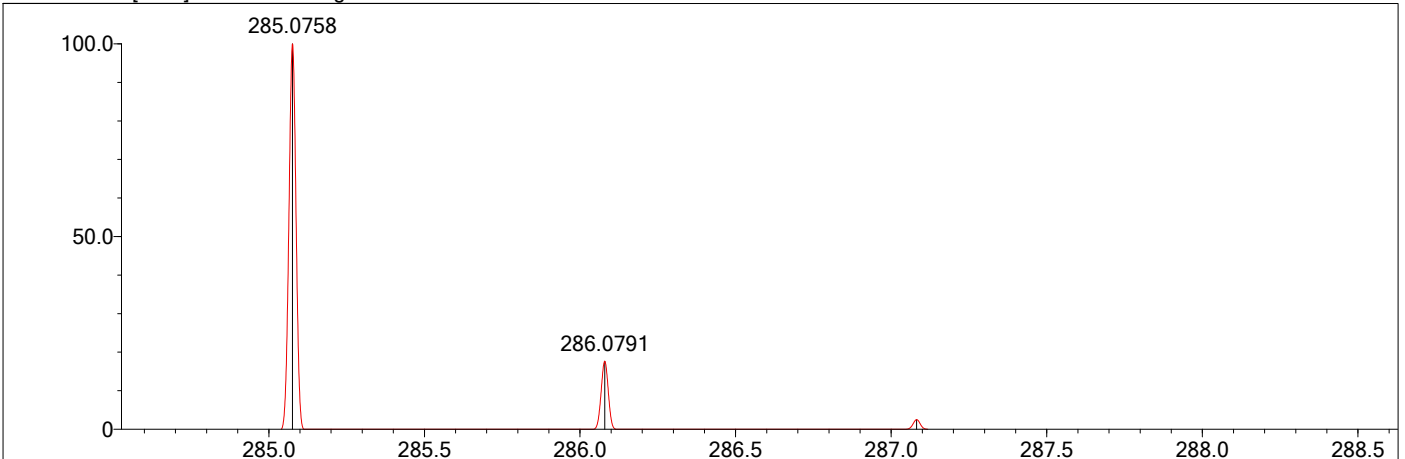

| Rank | Score | Formula (M) | Ion    | Meas. m/z | Pred. m/z | Df. (mDa) | Df. (ppm) | Iso   | DBE  |
|------|-------|-------------|--------|-----------|-----------|-----------|-----------|-------|------|
| 2    | 72.21 | C16 H12 O5  | [M+H]+ | 285.0754  | 285.0758  | -0.4      | -1.40     | 72.94 | 11.0 |

Data File: \\Deep-20160624\l\data1\邹永\SXH\SJF-2O.lcd

| Elmt | Val. | Min | Max | Use Adduct |
|------|------|-----|-----|------|------|-----|-----|------|------|-----|-----|------|------|-----|-----|------------|
| H    | 1    | 0   | 80  | O    | 2    | 0   | 7   | K    | 1    | 0   | 0   | Pd   | 2    | 0   | 0   | H          |
| 2H   | 1    | 0   | 0   | F    | 1    | 0   | 0   | Mn   | 3    | 0   | 0   | I    | 3    | 0   | 0   | Na         |
| 3H   | 1    | 0   | 0   | Si   | 4    | 0   | 0   | Fe   | 2    | 0   | 0   | Pt   | 2    | 0   | 0   | K          |
| B    | 3    | 0   | 0   | P    | 3    | 0   | 0   | Cu   | 2    | 0   | 0   | Au   | 1    | 0   | 0   |            |
| C    | 4    | 0   | 30  | S    | 2    | 0   | 0   | Se   | 2    | 0   | 0   |      |      |     |     |            |
| N    | 3    | 0   | 8   | Cl   | 1    | 0   | 0   | Br   | 1    | 0   | 0   |      |      |     |     |            |

Error Margin (ppm): 50  
 HC Ratio: 0.0 - 20.0  
 Max Isotopes: all  
 MSn Iso RI (%): 75.00

DBE Range: -100.0 - 1000.0  
 Apply N Rule: yes  
 Isotope RI (%): 1.00  
 MSn Logic Mode: AND

Electron Ions: both  
 Use MSn Info: no  
 Isotope Res: 10000  
 Max Results: 2000

Event#: 1 MS(E+) Ret. Time : 0.160 Scan#: 25

20

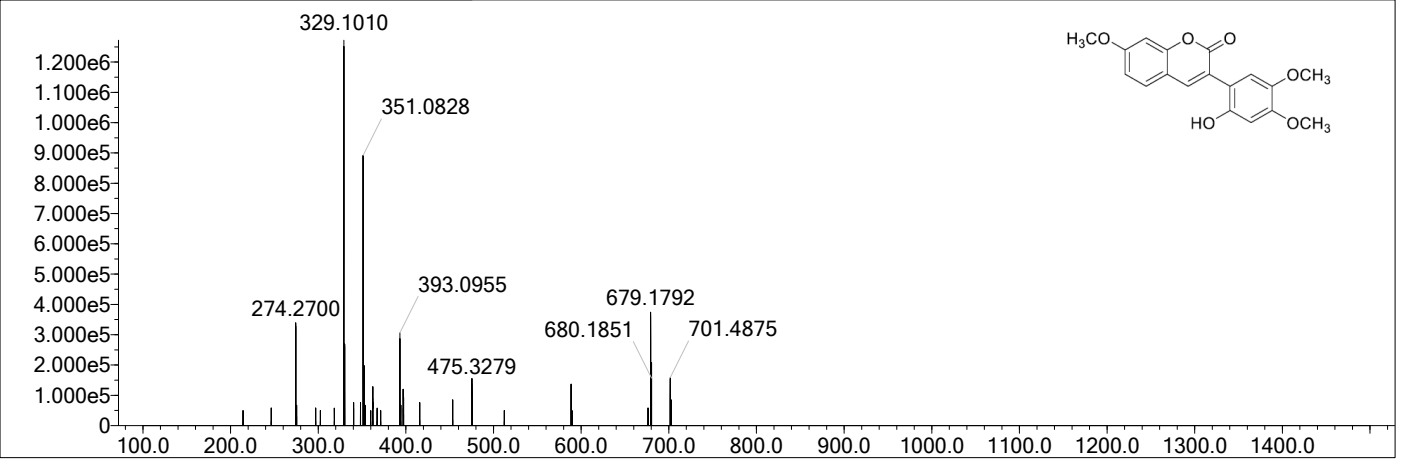

Measured region for 329.1010 m/z

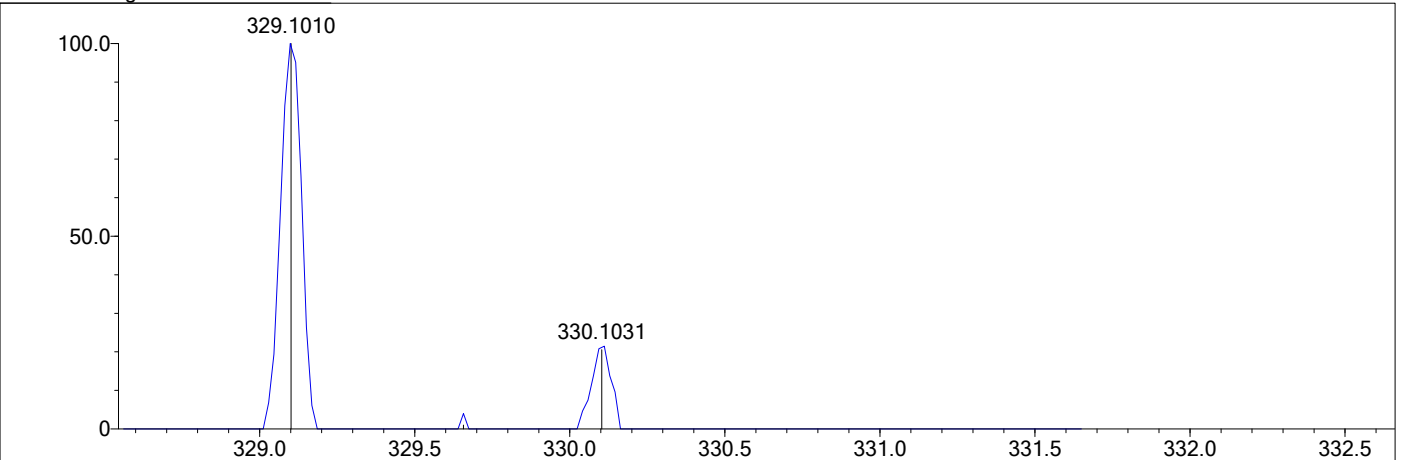

C18 H16 O6 [M+H]<sup>+</sup> : Predicted region for 329.1020 m/z

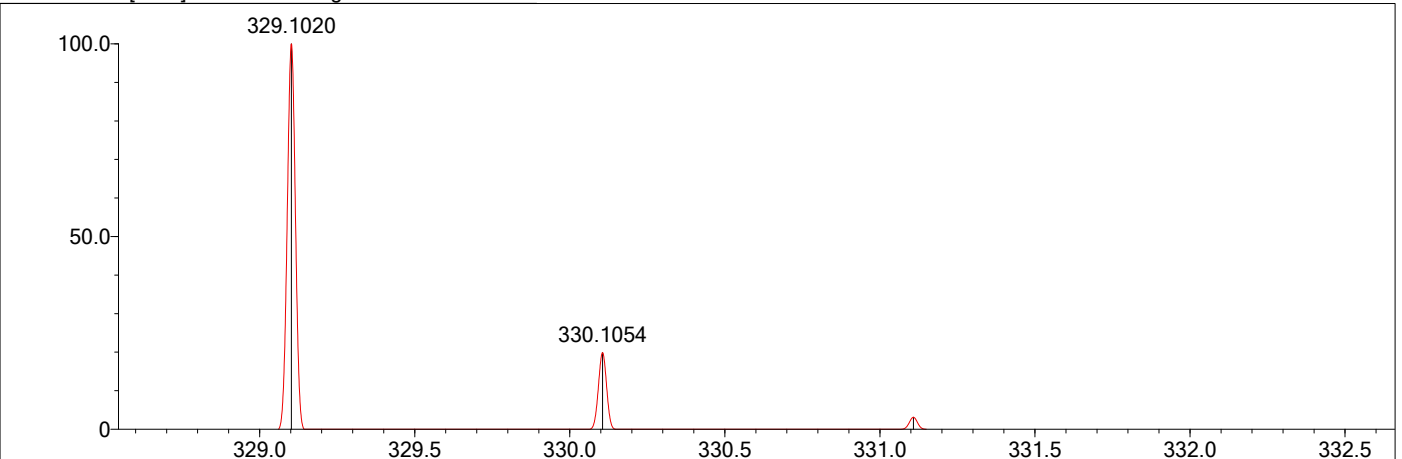

| Rank | Score | Formula (M) | Ion                | Meas. m/z | Pred. m/z | Df. (mDa) | Df. (ppm) | Iso   | DBE  |
|------|-------|-------------|--------------------|-----------|-----------|-----------|-----------|-------|------|
| 2    | 82.23 | C18 H16 O6  | [M+H] <sup>+</sup> | 329.1010  | 329.1020  | -1.0      | -3.04     | 86.65 | 11.0 |

Data File: \\Deep-20160624\data1\邹永\SXH\SJF-2P.lcd

| Elmt | Val. | Min | Max | Use Adduct |
|------|------|-----|-----|------|------|-----|-----|------|------|-----|-----|------|------|-----|-----|------------|
| H    | 1    | 0   | 80  | O    | 2    | 0   | 7   | K    | 1    | 0   | 0   | Pd   | 2    | 0   | 0   | H          |
| 2H   | 1    | 0   | 0   | F    | 1    | 0   | 0   | Mn   | 3    | 0   | 0   | I    | 3    | 0   | 0   | Na         |
| 3H   | 1    | 0   | 0   | Si   | 4    | 0   | 0   | Fe   | 2    | 0   | 0   | Pt   | 2    | 0   | 0   | K          |
| B    | 3    | 0   | 0   | P    | 3    | 0   | 0   | Cu   | 2    | 0   | 0   | Au   | 1    | 0   | 0   |            |
| C    | 4    | 0   | 30  | S    | 2    | 0   | 0   | Se   | 2    | 0   | 0   |      |      |     |     |            |
| N    | 3    | 0   | 8   | Cl   | 1    | 0   | 0   | Br   | 1    | 0   | 0   |      |      |     |     |            |

Error Margin (ppm): 50  
 HC Ratio: 0.0 - 20.0  
 Max Isotopes: all  
 MSn Iso RI (%): 75.00

DBE Range: -100.0 - 1000.0  
 Apply N Rule: yes  
 Isotope RI (%): 1.00  
 MSn Logic Mode: AND

Electron Ions: both  
 Use MSn Info: no  
 Isotope Res: 10000  
 Max Results: 2000

Event#: 1 MS(E+) Ret. Time : 0.147 Scan# : 23

2p

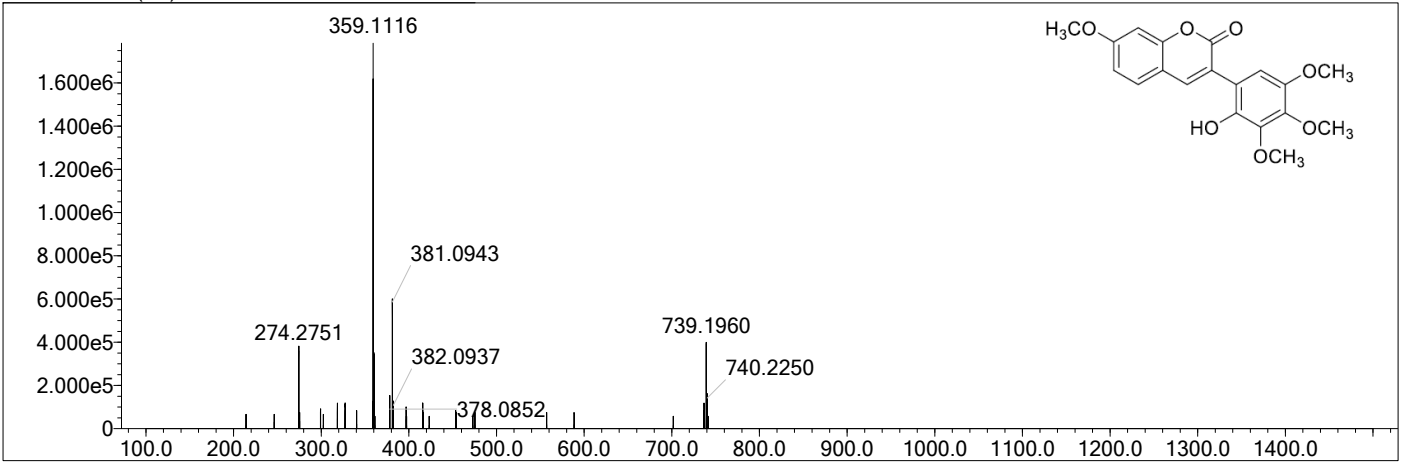

Measured region for 359.1116 m/z

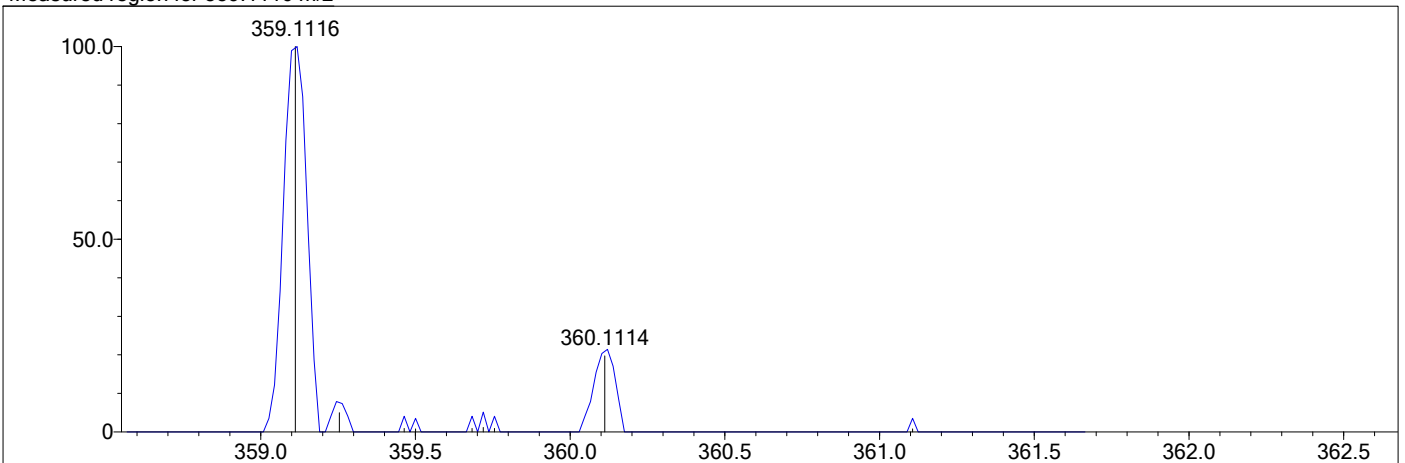

C19 H18 O7 [M+H]<sup>+</sup> : Predicted region for 359.1125 m/z

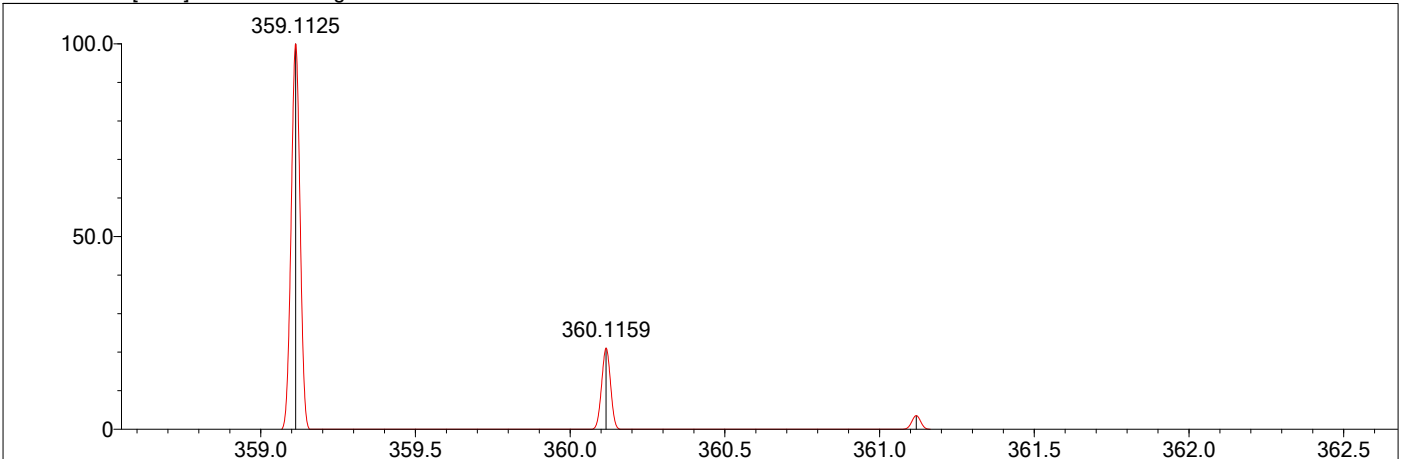

| Rank | Score | Formula (M) | Ion                | Meas. m/z | Pred. m/z | Df. (mDa) | Df. (ppm) | Iso   | DBE  |
|------|-------|-------------|--------------------|-----------|-----------|-----------|-----------|-------|------|
| 4    | 61.78 | C19 H18 O7  | [M+H] <sup>+</sup> | 359.1116  | 359.1125  | -0.9      | -2.51     | 64.20 | 11.0 |



Data File: \\Deep-20160624\l\data1\邹永\SXH\SJF-2Q.lcd

| Elmt | Val. | Min | Max | Use Adduct |
|------|------|-----|-----|------|------|-----|-----|------|------|-----|-----|------|------|-----|-----|------------|
| H    | 1    | 0   | 80  | O    | 2    | 0   | 7   | K    | 1    | 0   | 0   | Pd   | 2    | 0   | 0   | H          |
| 2H   | 1    | 0   | 0   | F    | 1    | 0   | 0   | Mn   | 3    | 0   | 0   | I    | 3    | 0   | 0   | Na         |
| 3H   | 1    | 0   | 0   | Si   | 4    | 0   | 0   | Fe   | 2    | 0   | 0   | Pt   | 2    | 0   | 0   | K          |
| B    | 3    | 0   | 0   | P    | 3    | 0   | 0   | Cu   | 2    | 0   | 0   | Au   | 1    | 0   | 0   |            |
| C    | 4    | 0   | 30  | S    | 2    | 0   | 0   | Se   | 2    | 0   | 0   |      |      |     |     |            |
| N    | 3    | 0   | 8   | Cl   | 1    | 0   | 0   | Br   | 1    | 0   | 0   |      |      |     |     |            |

Error Margin (ppm): 50  
 HC Ratio: 0.0 - 20.0  
 Max Isotopes: all  
 MSn Iso RI (%): 75.00

DBE Range: -100.0 - 1000.0  
 Apply N Rule: yes  
 Isotope RI (%): 1.00  
 MSn Logic Mode: AND

Electron Ions: both  
 Use MSn Info: no  
 Isotope Res: 10000  
 Max Results: 2000

Event#: 1 MS(E+) Ret. Time: 0.160 Scan#: 25

2q

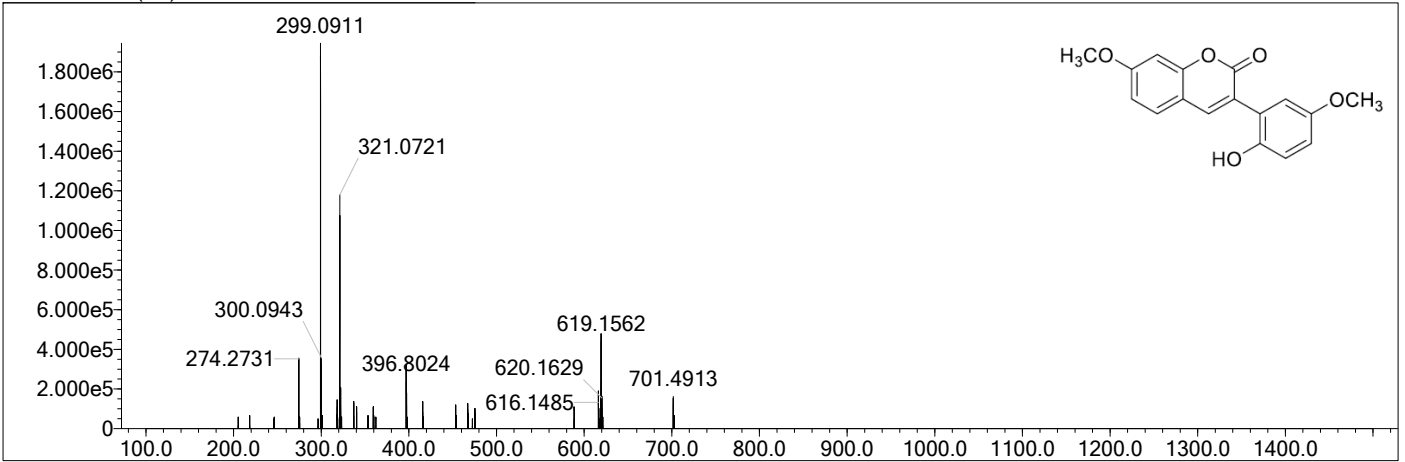

Measured region for 299.0911 m/z

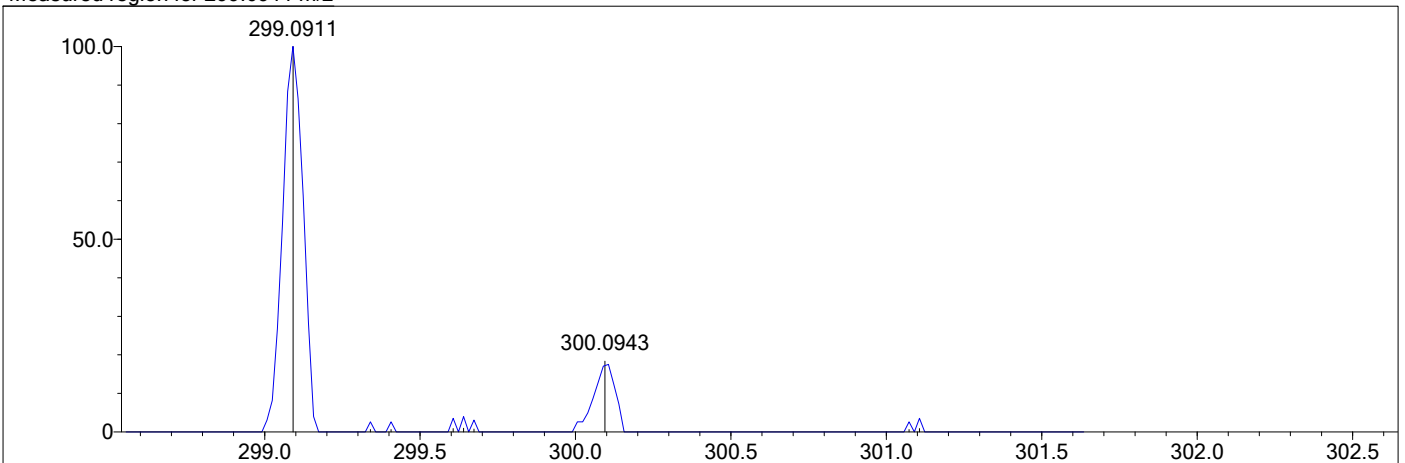

C17 H14 O5 [M+H]+ : Predicted region for 299.0914 m/z



| Rank | Score | Formula (M) | Ion                | Meas. m/z | Pred. m/z | Df. (mDa) | Df. (ppm) | Iso   | DBE  |
|------|-------|-------------|--------------------|-----------|-----------|-----------|-----------|-------|------|
| 1    | 78.60 | C17 H14 O5  | [M+H] <sup>+</sup> | 299.0911  | 299.0914  | -0.3      | -1.00     | 78.60 | 11.0 |

Data File: F:\高分辨数据\Zouyong\SXH\SJF-2R.lcd

| Elmt | Val. | Min | Max | Elmt | Val. | Min | Max | Elmt | Val. | Min | Max | Use Adduct |
|------|------|-----|-----|------|------|-----|-----|------|------|-----|-----|------------|
| H    | 1    | 0   | 18  | O    | 2    | 0   | 7   | Cl   | 1    | 0   | 0   | H          |
| B    | 3    | 0   | 0   | F    | 1    | 0   | 0   | Br   | 1    | 0   | 0   | Na         |
| C    | 4    | 0   | 19  | P    | 3    | 0   | 0   | I    | 3    | 0   | 0   | K          |
| N    | 3    | 0   | 0   | S    | 2    | 0   | 0   |      |      |     |     | NH4        |

Error Margin (ppm): 5  
 HC Ratio: unlimited  
 Max Isotopes: all  
 MSn Iso RI (%): 75.00

DBE Range: -1.0 - 1500.0  
 Apply N Rule: no  
 Isotope RI (%): 1.00  
 MSn Logic Mode: AND

Electron Ions: both  
 Use MSn Info: no  
 Isotope Res: 10000  
 Max Results: 40

Event#: 1 MS(E+) Ret. Time: 0.893 Scan#: 135

2r

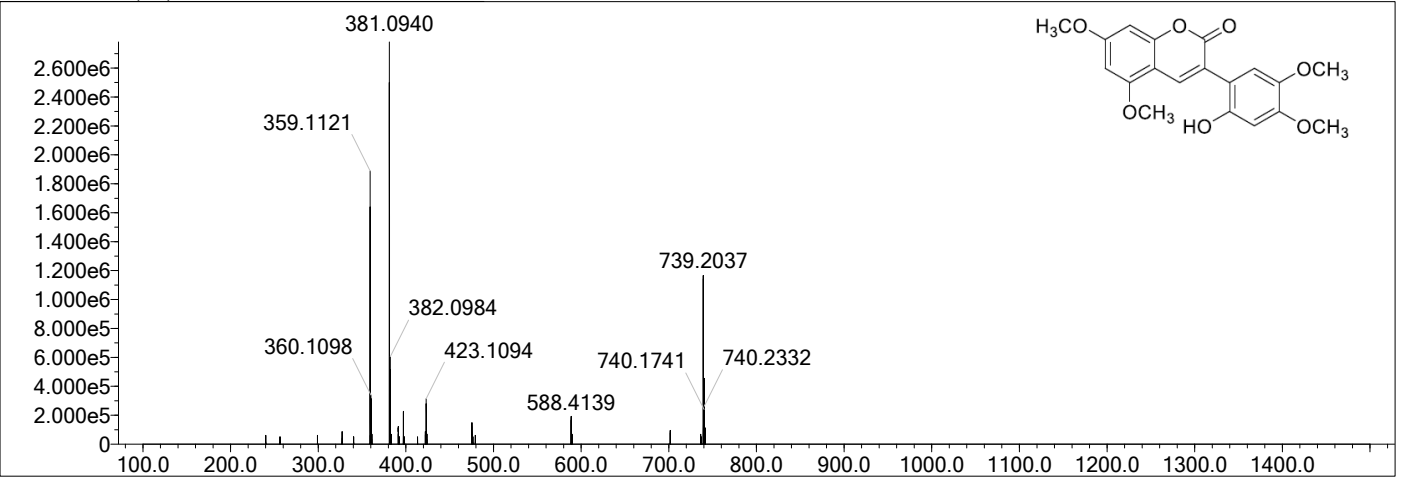

Measured region for 359.1121 m/z

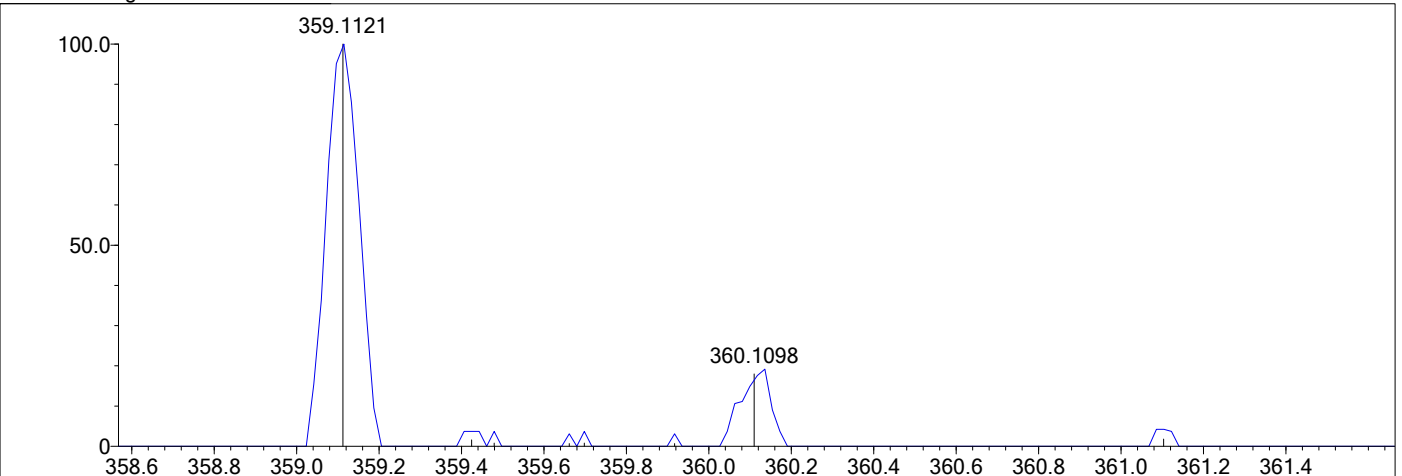

C19H18O7 [M+H]<sup>+</sup> : Predicted region for 359.1125 m/z

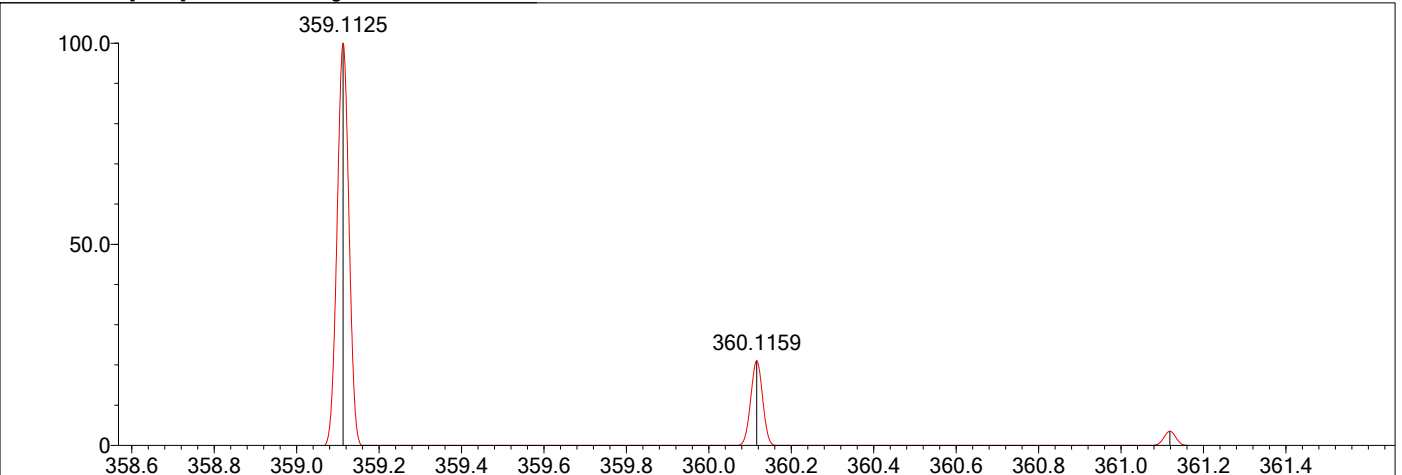

| Rank | Score | Formula (M) | Ion                | Meas. m/z | Pred. m/z | Df. (mDa) | Df. (ppm) | Iso   | DBE  |
|------|-------|-------------|--------------------|-----------|-----------|-----------|-----------|-------|------|
| 1    | 63.36 | C19H18O7    | [M+H] <sup>+</sup> | 359.1121  | 359.1125  | -0.4      | -1.11     | 63.53 | 11.0 |

Data File: \\Deep-20160624\data1\邹永\SXH\SJF-2S.lcd

| Elmt | Val. | Min | Max | Use Adduct |
|------|------|-----|-----|------|------|-----|-----|------|------|-----|-----|------|------|-----|-----|------------|
| H    | 1    | 8   | 10  | O    | 2    | 3   | 5   | K    | 1    | 0   | 0   | Pd   | 2    | 0   | 0   | H          |
| 2H   | 1    | 0   | 0   | F    | 1    | 0   | 0   | Mn   | 3    | 0   | 0   | I    | 3    | 0   | 0   |            |
| 3H   | 1    | 0   | 0   | Si   | 4    | 0   | 0   | Fe   | 2    | 0   | 0   | Pt   | 2    | 0   | 0   |            |
| B    | 3    | 0   | 0   | P    | 3    | 0   | 0   | Cu   | 2    | 0   | 0   | Au   | 1    | 0   | 0   |            |
| C    | 4    | 15  | 15  | S    | 2    | 0   | 0   | Se   | 2    | 0   | 0   |      |      |     |     |            |
| N    | 3    | 0   | 0   | Cl   | 1    | 0   | 0   | Br   | 1    | 0   | 0   |      |      |     |     |            |

Error Margin (ppm): 100  
 HC Ratio: 0.0 - 100.0  
 Max Isotopes: all  
 MSn Iso RI (%): 75.00

DBE Range: -100.0 - 200.0  
 Apply N Rule: yes  
 Isotope RI (%): 1.00  
 MSn Logic Mode: AND

Electron Ions: both  
 Use MSn Info: no  
 Isotope Res: 10000  
 Max Results: 100

Event#: 1 MS(E+) Ret. Time : 0.827 -> 0.827 Scan# : 125 -> 125

2s

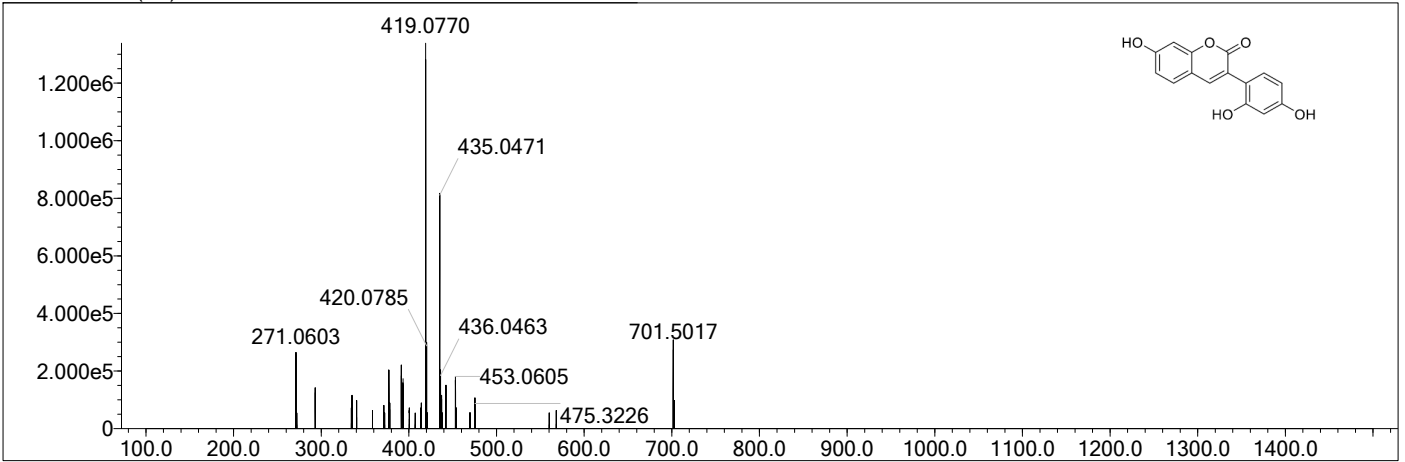

Measured region for 271.0603 m/z

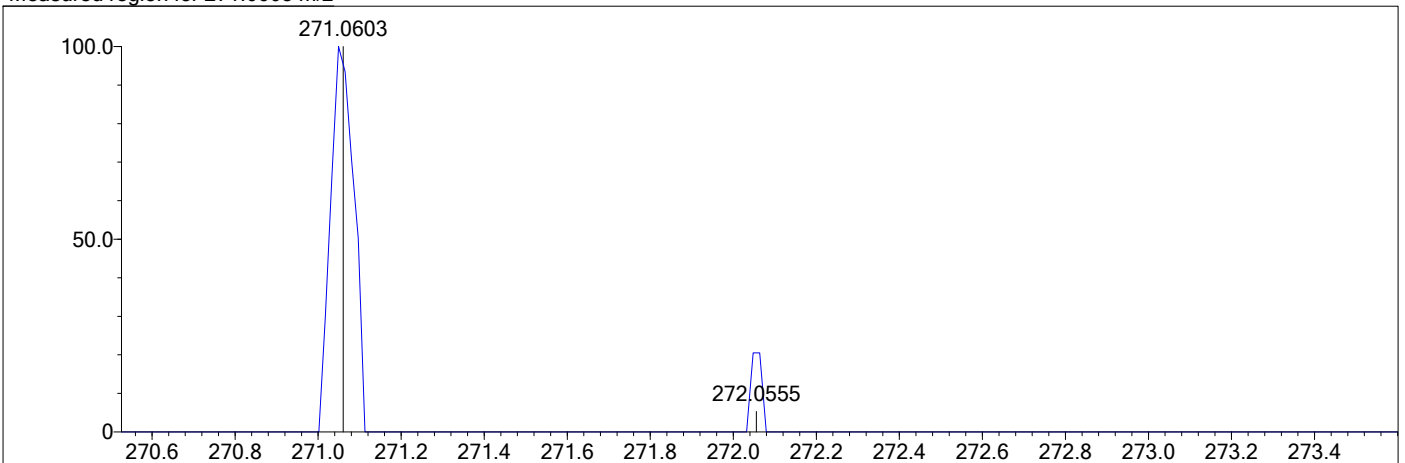

C15 H10 O5 [M+H]+ : Predicted region for 271.0601 m/z

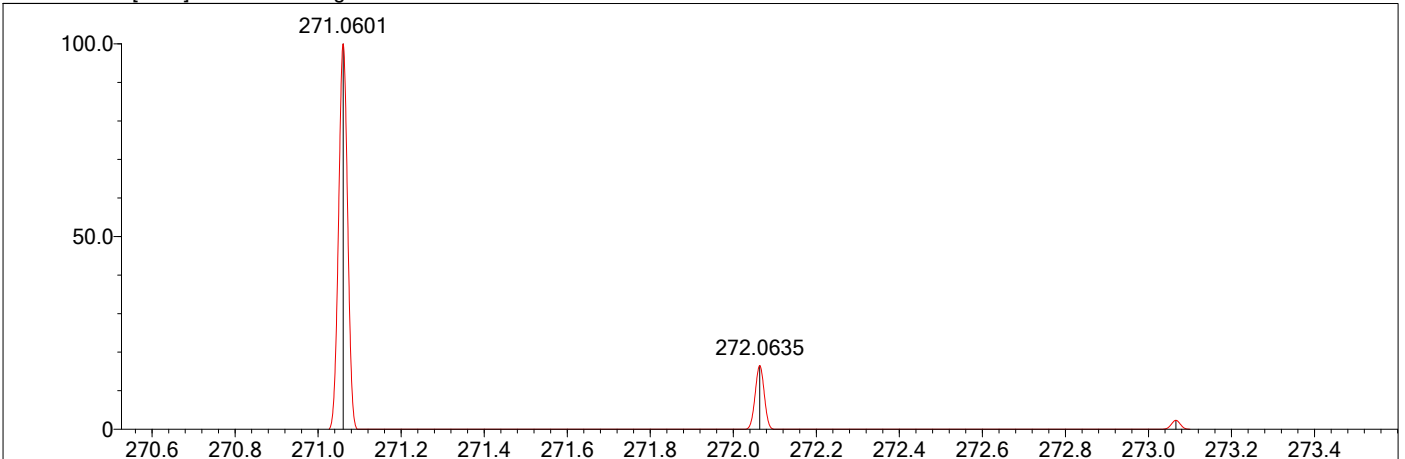

| Rank | Score | Formula (M) | Ion    | Meas. m/z | Pred. m/z | Df. (mDa) | Df. (ppm) | Iso   | DBE  |
|------|-------|-------------|--------|-----------|-----------|-----------|-----------|-------|------|
| 1    | 44.53 | C15 H10 O5  | [M+H]+ | 271.0603  | 271.0601  | 0.2       | 0.74      | 44.53 | 11.0 |

Data File: F:\高分辨数据\Zouyong\SXH\SJF-2T.lcd

| Elmt | Val. | Min | Max | Elmt | Val. | Min | Max | Elmt | Val. | Min | Max | Use Adduct |
|------|------|-----|-----|------|------|-----|-----|------|------|-----|-----|------------|
| H    | 1    | 0   | 12  | O    | 2    | 0   | 5   | Cl   | 1    | 0   | 0   | H          |
| B    | 3    | 0   | 0   | F    | 1    | 0   | 0   | Br   | 1    | 0   | 0   | Na         |
| C    | 4    | 0   | 16  | P    | 3    | 0   | 0   | I    | 3    | 0   | 0   | K          |
| N    | 3    | 0   | 0   | S    | 2    | 0   | 0   |      |      |     |     | NH4        |

Error Margin (ppm): 5  
 HC Ratio: unlimited  
 Max Isotopes: all  
 MSn Iso RI (%): 75.00

DBE Range: -1.0 - 1500.0  
 Apply N Rule: no  
 Isotope RI (%): 1.00  
 MSn Logic Mode: AND

Electron Ions: both  
 Use MSn Info: no  
 Isotope Res: 10000  
 Max Results: 40

Event#: 1 MS(E+) Ret. Time : 0.693 Scan# : 105

2t

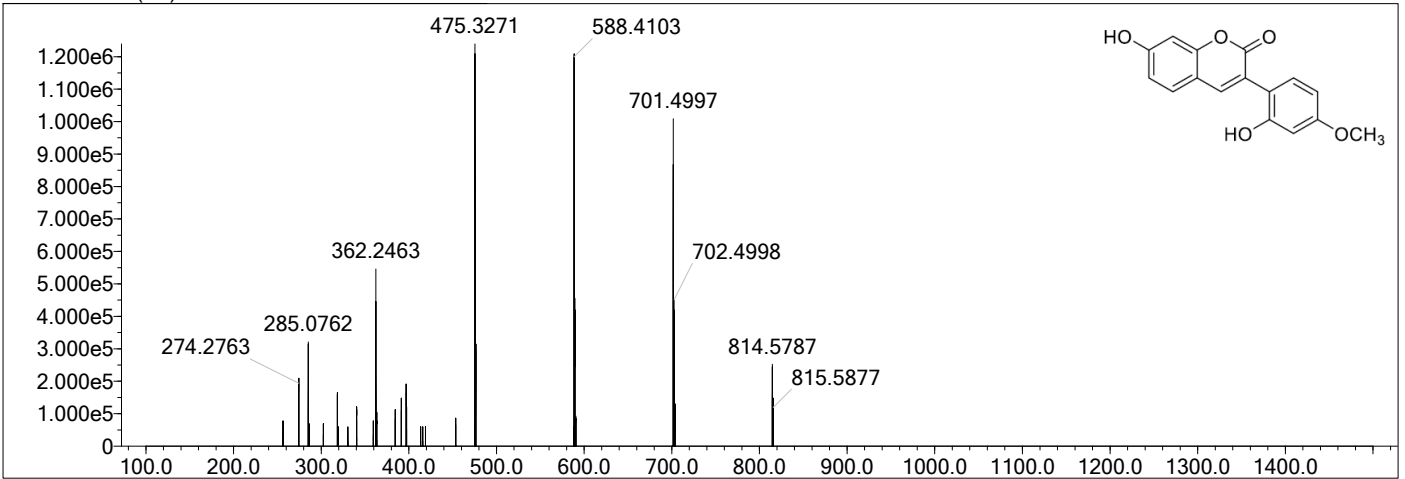

Measured region for 285.0762 m/z

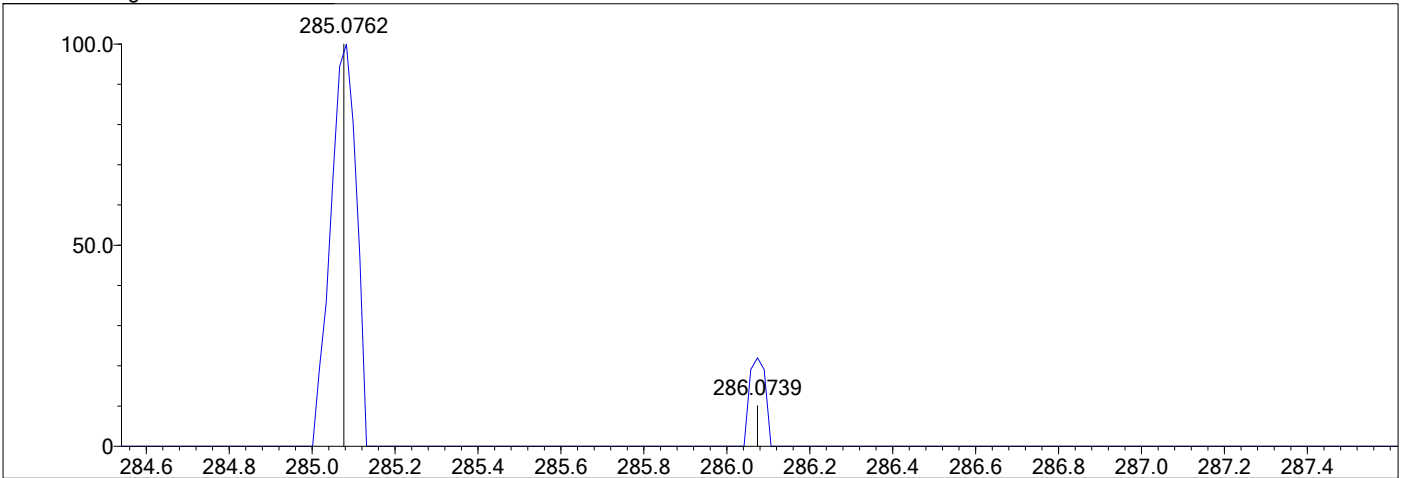

C16 H12 O5 [M+H]<sup>+</sup> : Predicted region for 285.0758 m/z



| Rank | Score | Formula (M) | Ion                | Meas. m/z | Pred. m/z | Df. (mDa) | Df. (ppm) | Iso   | DBE  |
|------|-------|-------------|--------------------|-----------|-----------|-----------|-----------|-------|------|
| 1    | 64.35 | C16 H12 O5  | [M+H] <sup>+</sup> | 285.0762  | 285.0758  | 0.4       | 1.40      | 65.00 | 11.0 |

Data File: F:\高分辨数据\Zouyong\SXH\SJF-2U.lcd

| Elmt | Val. | Min | Max | Elmt | Val. | Min | Max | Elmt | Val. | Min | Max | Use Adduct |
|------|------|-----|-----|------|------|-----|-----|------|------|-----|-----|------------|
| H    | 1    | 0   | 14  | O    | 2    | 0   | 6   | Cl   | 1    | 0   | 0   | H          |
| B    | 3    | 0   | 0   | F    | 1    | 0   | 0   | Br   | 1    | 0   | 0   | Na         |
| C    | 4    | 0   | 17  | P    | 3    | 0   | 0   | I    | 3    | 0   | 0   | K          |
| N    | 3    | 0   | 0   | S    | 2    | 0   | 0   |      |      |     |     | NH4        |

Error Margin (ppm): 5  
 HC Ratio: unlimited  
 Max Isotopes: all  
 MSn Iso RI (%): 75.00

DBE Range: -1.0 - 1500.0  
 Apply N Rule: no  
 Isotope RI (%): 1.00  
 MSn Logic Mode: AND

Electron Ions: both  
 Use MSn Info: no  
 Isotope Res: 10000  
 Max Results: 40

Event#: 1 MS(E+) Ret. Time : 0.707 Scan#: 107

2u

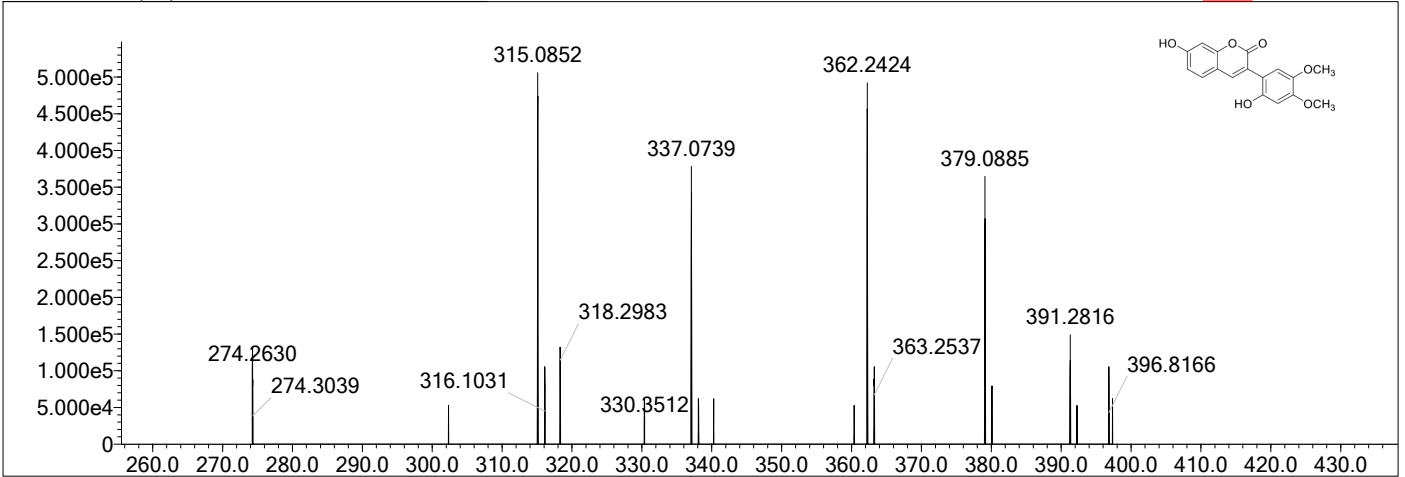

Measured region for 315.0852 m/z

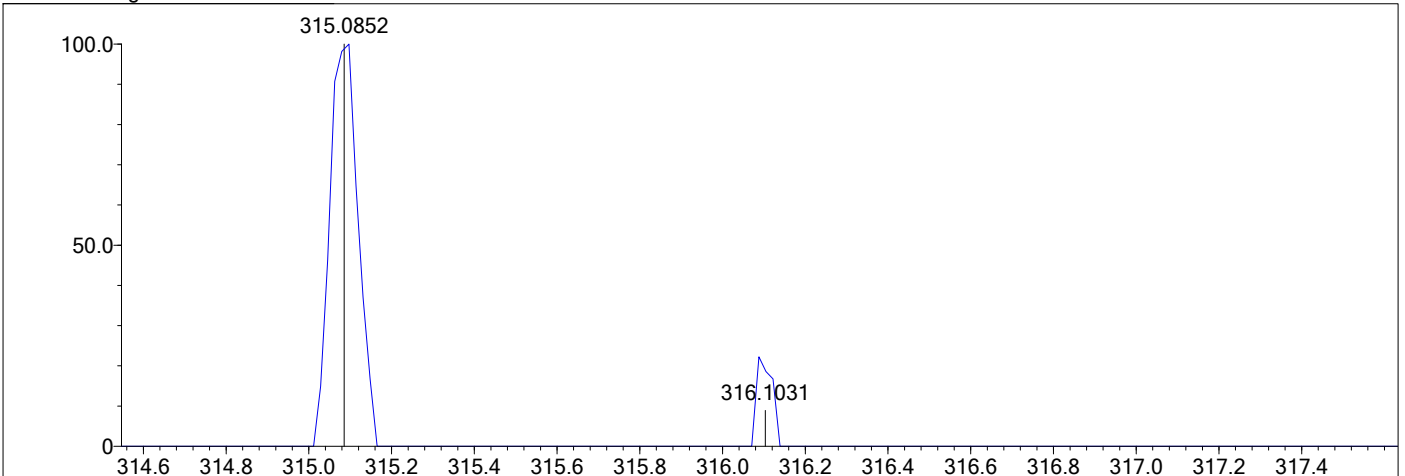

C17 H14 O6 [M+H]+ : Predicted region for 315.0863 m/z

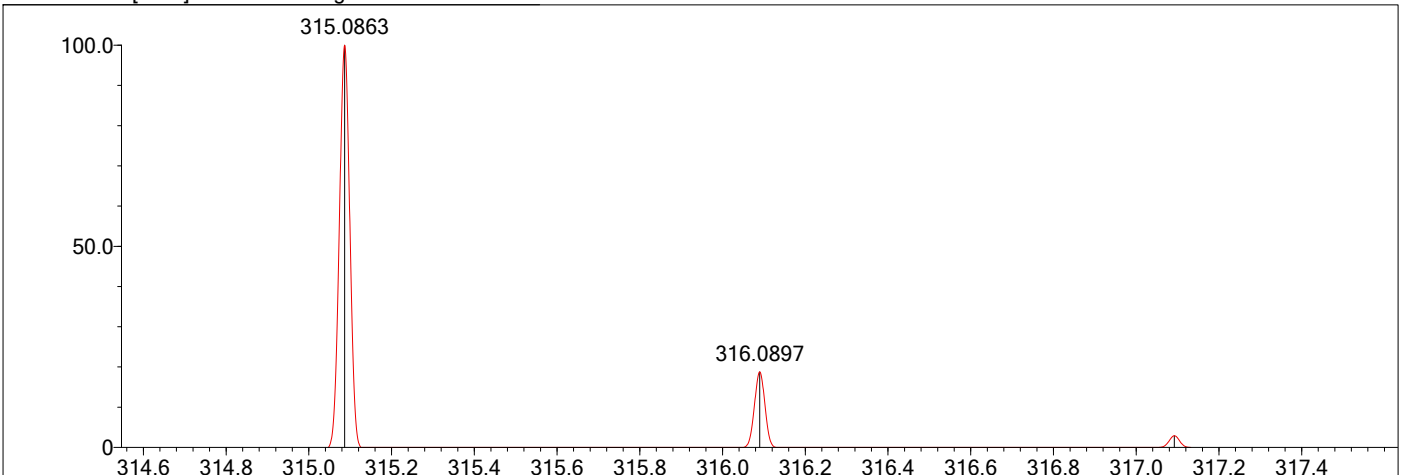

| Rank | Score | Formula (M) | Ion    | Meas. m/z | Pred. m/z | Df. (mDa) | Df. (ppm) | Iso   | DBE  |
|------|-------|-------------|--------|-----------|-----------|-----------|-----------|-------|------|
| 1    | 52.70 | C17 H14 O6  | [M+H]+ | 315.0852  | 315.0863  | -1.1      | -3.49     | 56.20 | 11.0 |

Data File: F:\高分辨数据\Zouyong\SXH\SJF-2V.lcd

| Elmt | Val. | Min | Max | Elmt | Val. | Min | Max | Elmt | Val. | Min | Max | Use Adduct |
|------|------|-----|-----|------|------|-----|-----|------|------|-----|-----|------------|
| H    | 1    | 0   | 10  | O    | 2    | 0   | 6   | Cl   | 1    | 0   | 0   | H          |
| B    | 3    | 0   | 0   | F    | 1    | 0   | 0   | Br   | 1    | 0   | 0   | HCOO       |
| C    | 4    | 0   | 16  | P    | 3    | 0   | 0   | I    | 3    | 0   | 0   | CH3COO     |
| N    | 3    | 0   | 0   | S    | 2    | 0   | 0   |      |      |     |     | Cl         |

Error Margin (ppm): 5  
 HC Ratio: unlimited  
 Max Isotopes: all  
 MSn Iso RI (%): 75.00

DBE Range: -1.0 - 1500.0  
 Apply N Rule: no  
 Isotope RI (%): 1.00  
 MSn Logic Mode: AND

Electron Ions: both  
 Use MSn Info: no  
 Isotope Res: 10000  
 Max Results: 40

Event#: 2 MS(E-) Ret. Time : 0.653 Scan#: 100

2v

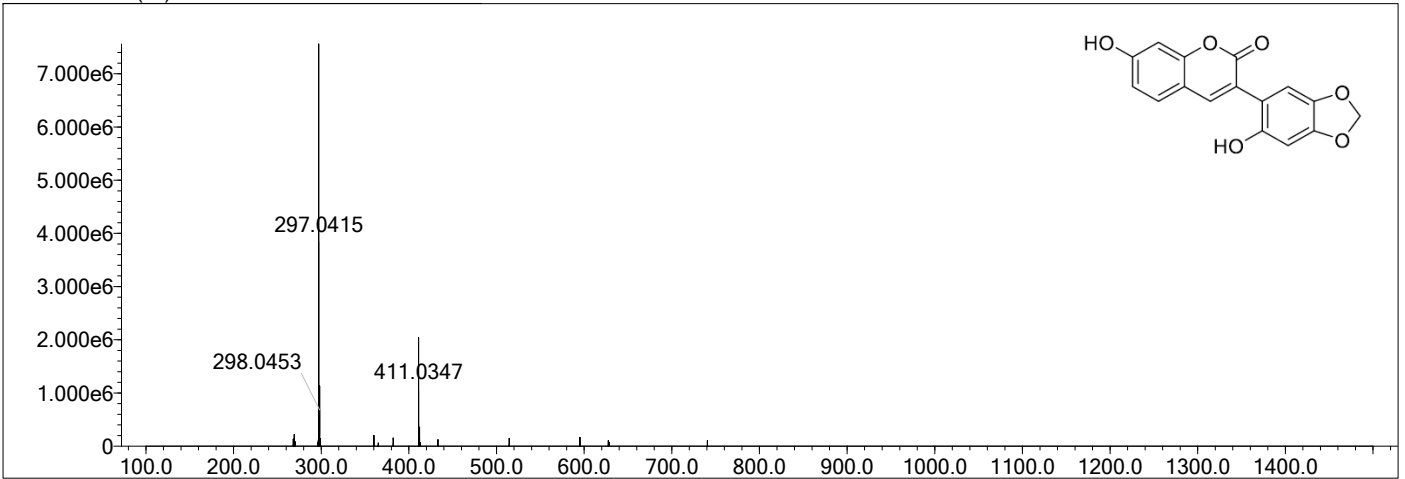

Measured region for 297.0415 m/z

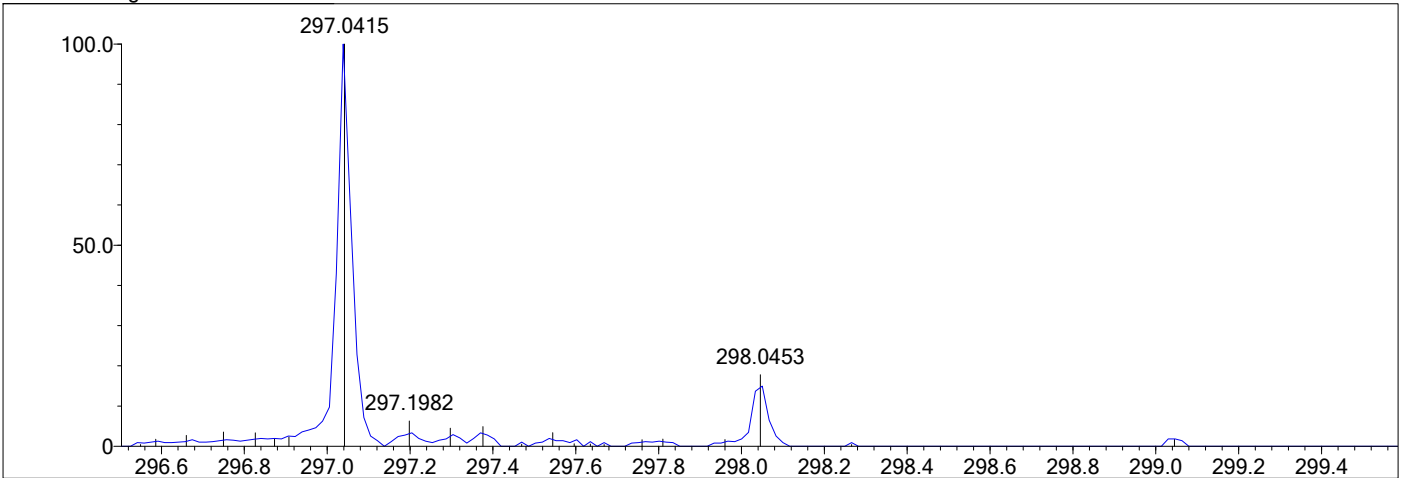

C16 H10 O6 [M-H]-: Predicted region for 297.0405 m/z

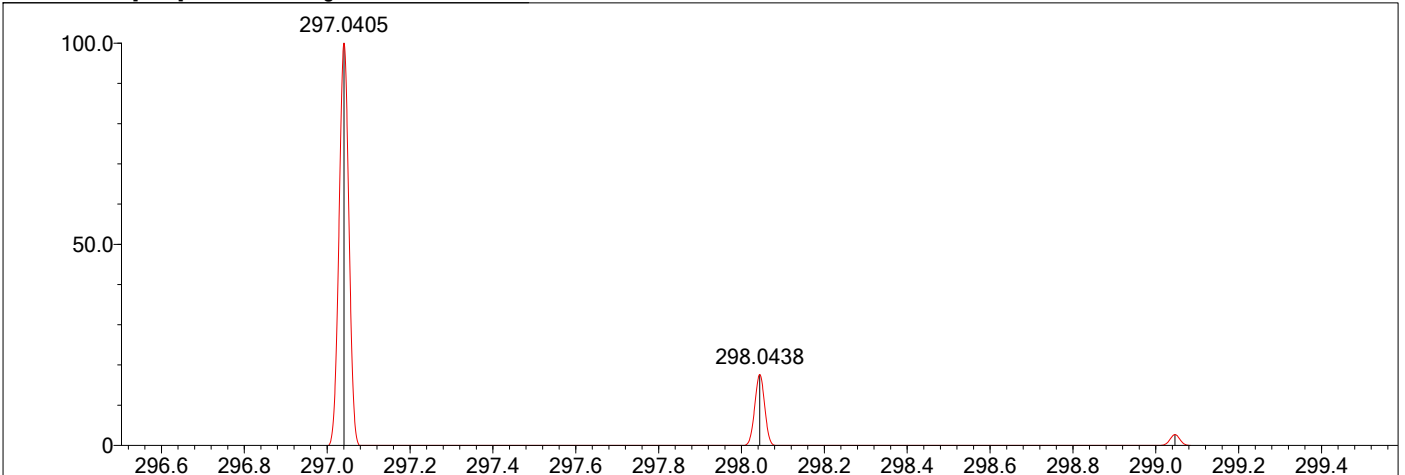

| Rank | Score | Formula (M) | Ion    | Meas. m/z | Pred. m/z | Df. (mDa) | Df. (ppm) | Iso   | DBE  |
|------|-------|-------------|--------|-----------|-----------|-----------|-----------|-------|------|
| 1    | 79.26 | C16 H10 O6  | [M-H]- | 297.0415  | 297.0405  | 1.0       | 3.37      | 84.25 | 12.0 |

Data File: F:\高分辨数据\Zouyong\SXH\SJF-4S.lcd

| Elmt | Val. | Min | Max | Use Adduct |
|------|------|-----|-----|------|------|-----|-----|------|------|-----|-----|------|------|-----|-----|------------|
| H    | 1    | 0   | 8   | N    | 3    | 0   | 0   | P    | 3    | 0   | 0   | Br   | 1    | 0   | 0   | H          |
| B    | 3    | 0   | 0   | O    | 2    | 0   | 4   | S    | 2    | 0   | 0   | I    | 3    | 0   | 0   | HCOO       |
| C    | 4    | 0   | 8   | F    | 1    | 0   | 0   | Cl   | 1    | 0   | 0   |      |      |     |     | CH3COO     |

Error Margin (ppm): 20  
 HC Ratio: unlimited  
 Max Isotopes: all  
 MSn Iso RI (%): 75.00

DBE Range: -1.0 - 1500.0  
 Apply N Rule: no  
 Isotope RI (%): 1.00  
 MSn Logic Mode: AND

Electron Ions: both  
 Use MSn Info: no  
 Isotope Res: 10000  
 Max Results: 40

Event#: 2 MS(E-) Ret. Time : 0.680 - 0.587 -> 0.975 Scan#: 104 - 90 -> 148

4s

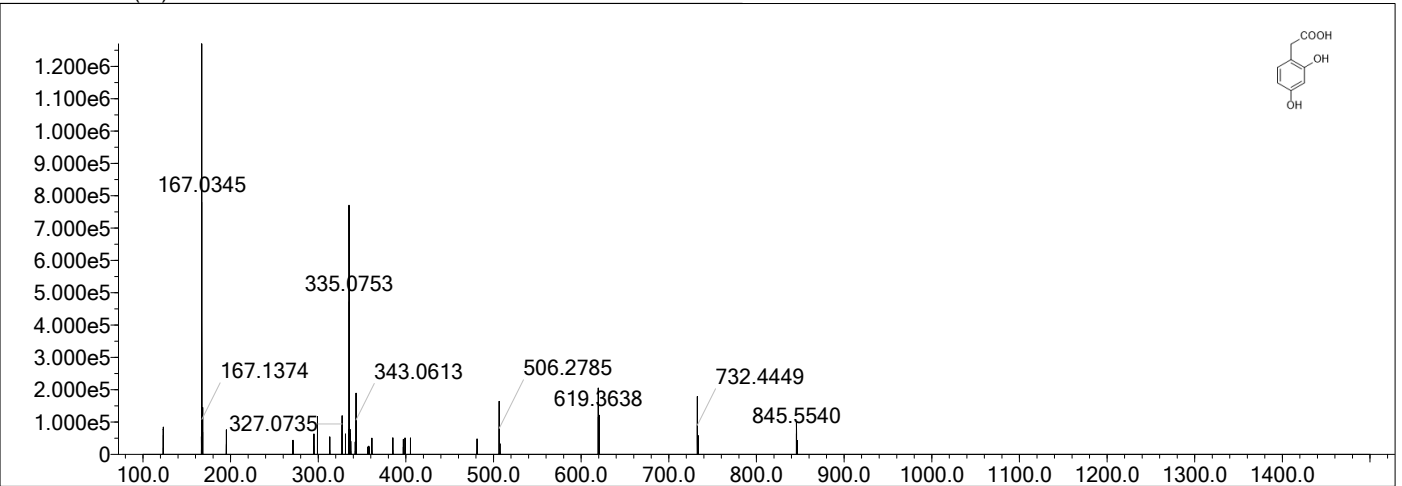

Measured region for 167.0345 m/z

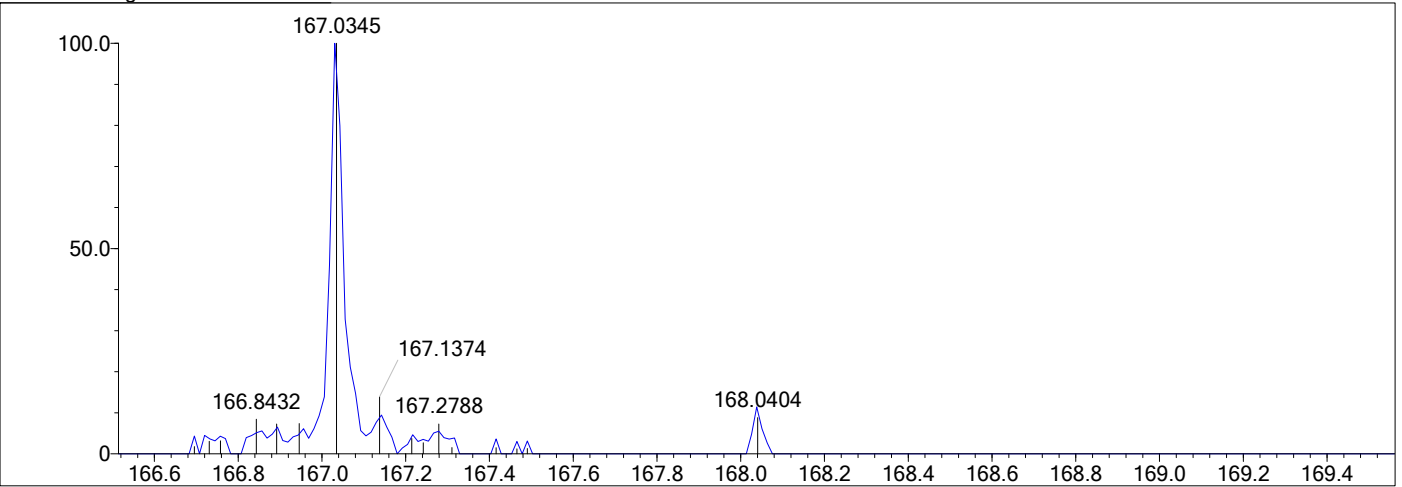

C8 H8 O4 [M-H]- : Predicted region for 167.0350 m/z

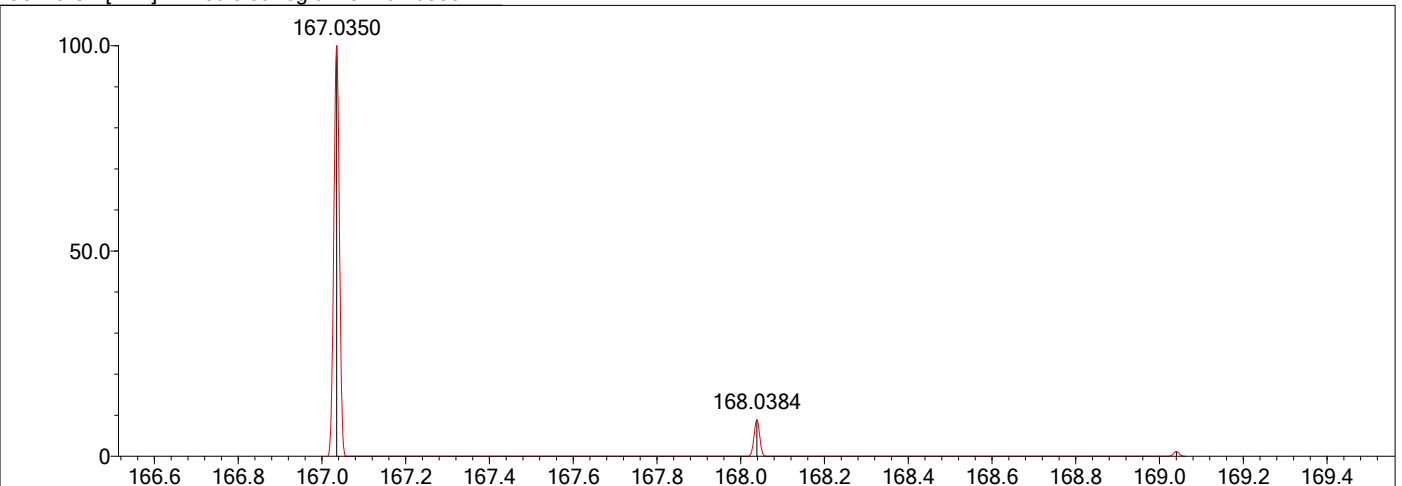

| Rank | Score | Formula (M) | Ion    | Meas. m/z | Pred. m/z | Df. (mDa) | Df. (ppm) | Iso   | DBE |
|------|-------|-------------|--------|-----------|-----------|-----------|-----------|-------|-----|
| 1    | 45.78 | C8 H8 O4    | [M-H]- | 167.0345  | 167.0350  | -0.5      | -2.99     | 48.18 | 5.0 |

Data File: F:\高分辨数据\Zouyong\SXH\SJF-4T.lcd

| Elmt | Val. | Min | Max | Use Adduct |
|------|------|-----|-----|------|------|-----|-----|------|------|-----|-----|------|------|-----|-----|------------|
| H    | 1    | 7   | 10  | N    | 3    | 0   | 0   | P    | 3    | 0   | 0   | Br   | 1    | 0   | 0   | H          |
| B    | 3    | 0   | 0   | O    | 2    | 0   | 4   | S    | 2    | 0   | 0   | I    | 3    | 0   | 0   | HCOO       |
| C    | 4    | 8   | 9   | F    | 1    | 0   | 0   | Cl   | 1    | 0   | 0   |      |      |     |     |            |

Error Margin (ppm): 100  
 HC Ratio: unlimited  
 Max Isotopes: all  
 MSn Iso RI (%): 75.00

DBE Range: -1.0 - 1500.0  
 Apply N Rule: no  
 Isotope RI (%): 1.00  
 MSn Logic Mode: AND

Electron Ions: both  
 Use MSn Info: no  
 Isotope Res: 10000  
 Max Results: 40

Event#: 2 MS(E-) Ret. Time : 1.013 - 0.733 -> 2.219 Scan#: 154 - 112 -> 334

4t

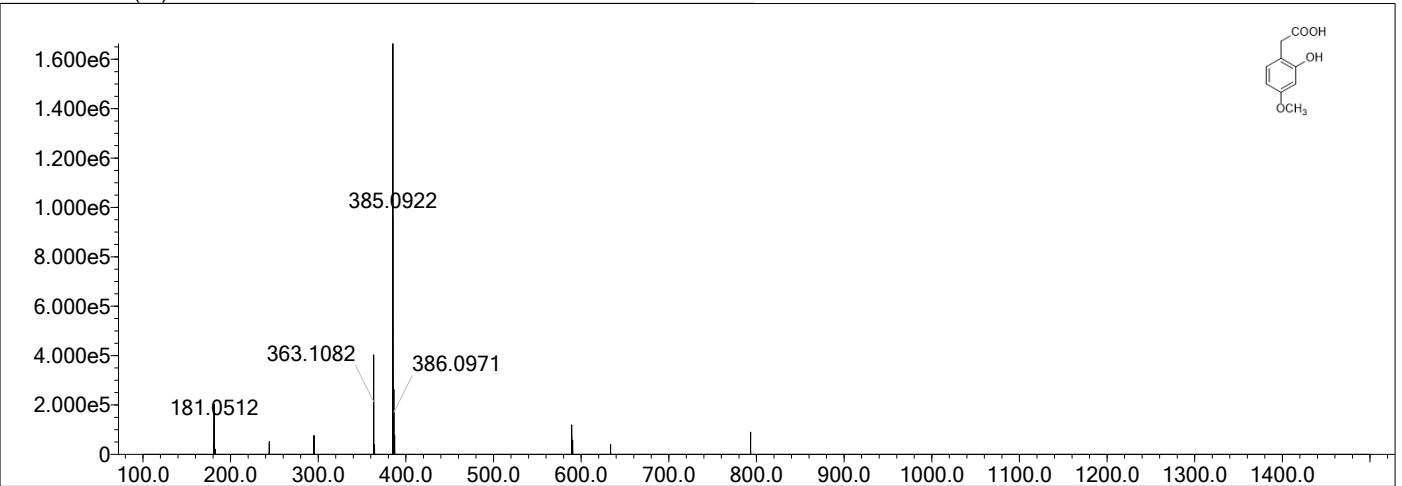

Measured region for 181.0512 m/z

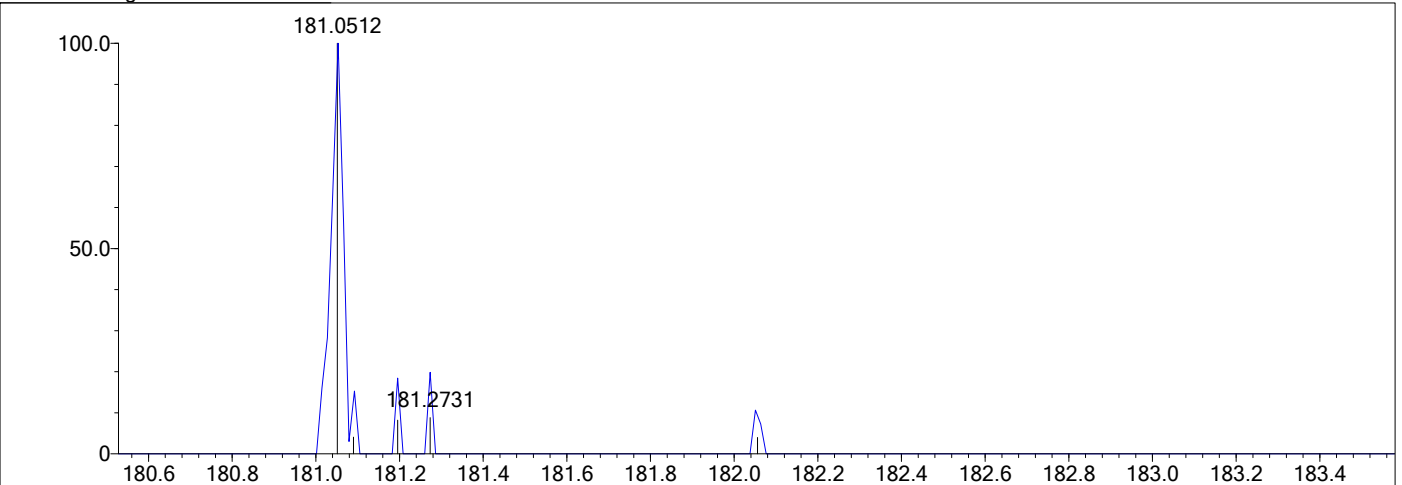

C9 H10 O4 [M-H]- : Predicted region for 181.0506 m/z

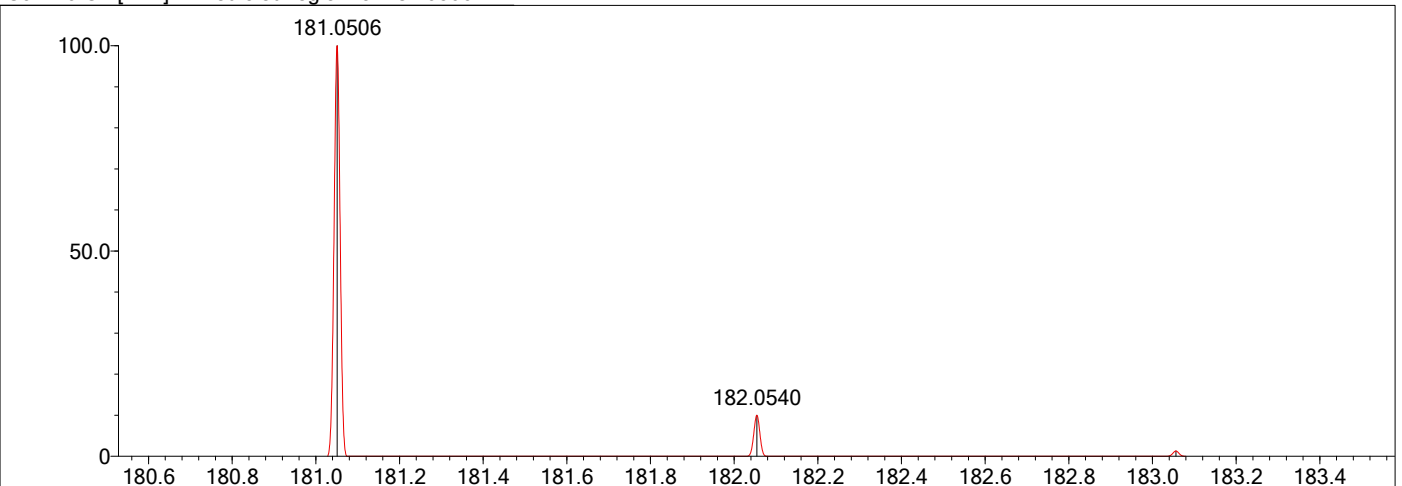

| Rank | Score | Formula (M) | Ion    | Meas. m/z | Pred. m/z | Df. (mDa) | Df. (ppm) | Iso   | DBE |
|------|-------|-------------|--------|-----------|-----------|-----------|-----------|-------|-----|
| 1    | 58.19 | C9 H10 O4   | [M-H]- | 181.0512  | 181.0506  | 0.6       | 3.31      | 61.75 | 5.0 |



Data File: F:\高分辨数据\Zouyong\SXH\SJF-4U.lcd

| Elmt | Val. | Min | Max | Use Adduct |
|------|------|-----|-----|------|------|-----|-----|------|------|-----|-----|------|------|-----|-----|------------|
| H    | 1    | 11  | 12  | N    | 3    | 0   | 0   | P    | 3    | 0   | 0   | Br   | 1    | 0   | 0   | H          |
| B    | 3    | 0   | 0   | O    | 2    | 0   | 5   | S    | 2    | 0   | 0   | I    | 3    | 0   | 0   | HCOO       |
| C    | 4    | 10  | 10  | F    | 1    | 0   | 0   | Cl   | 1    | 0   | 0   |      |      |     |     |            |

Error Margin (ppm): 100  
 HC Ratio: unlimited  
 Max Isotopes: all  
 MSn Iso RI (%): 75.00

DBE Range: -1.0 - 1500.0  
 Apply N Rule: no  
 Isotope RI (%): 1.00  
 MSn Logic Mode: AND

Electron Ions: both  
 Use MSn Info: no  
 Isotope Res: 10000  
 Max Results: 40

4u

Event#: 2 MS(E-) Ret. Time : 0.680 - 0.573 -> 1.855 Scan#: 104 - 88 -> 280

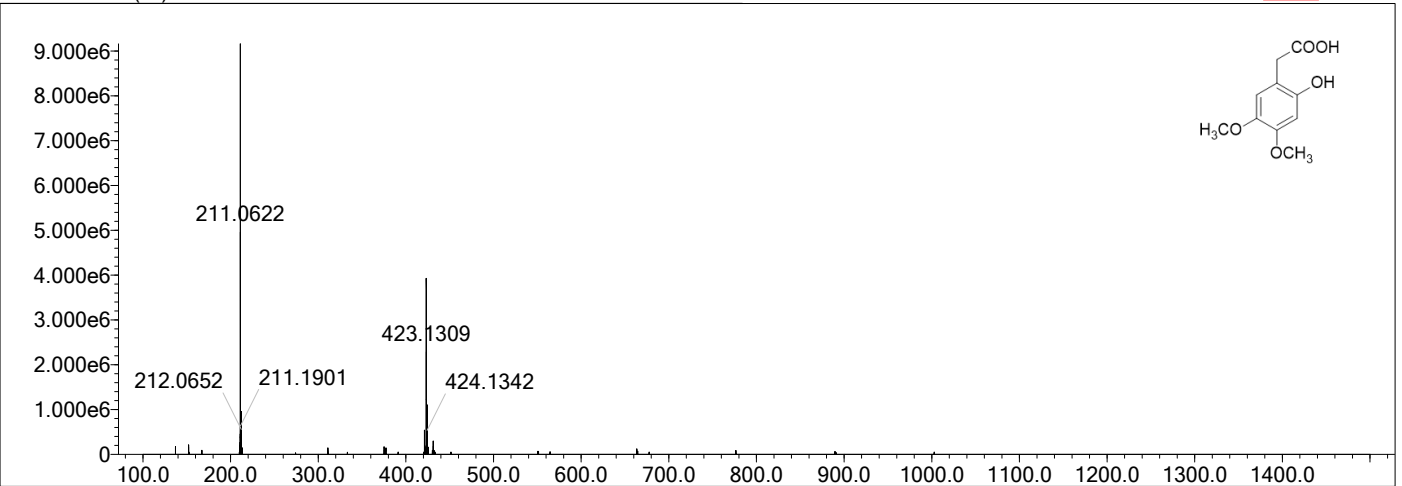

Measured region for 211.0622 m/z

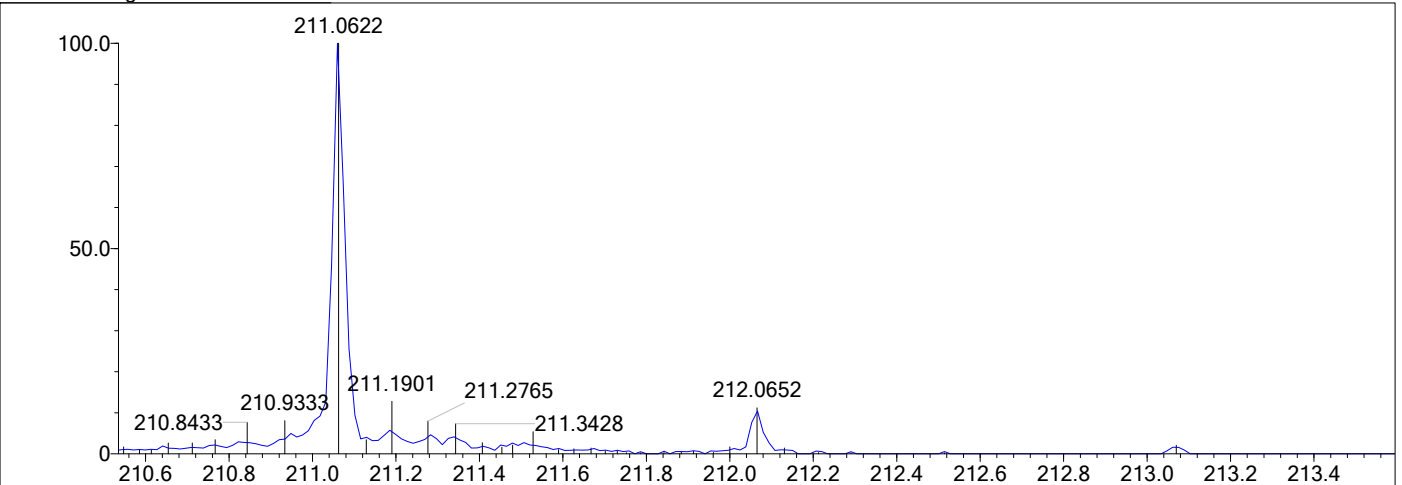

C10 H12 O5 [M-H]- : Predicted region for 211.0612 m/z

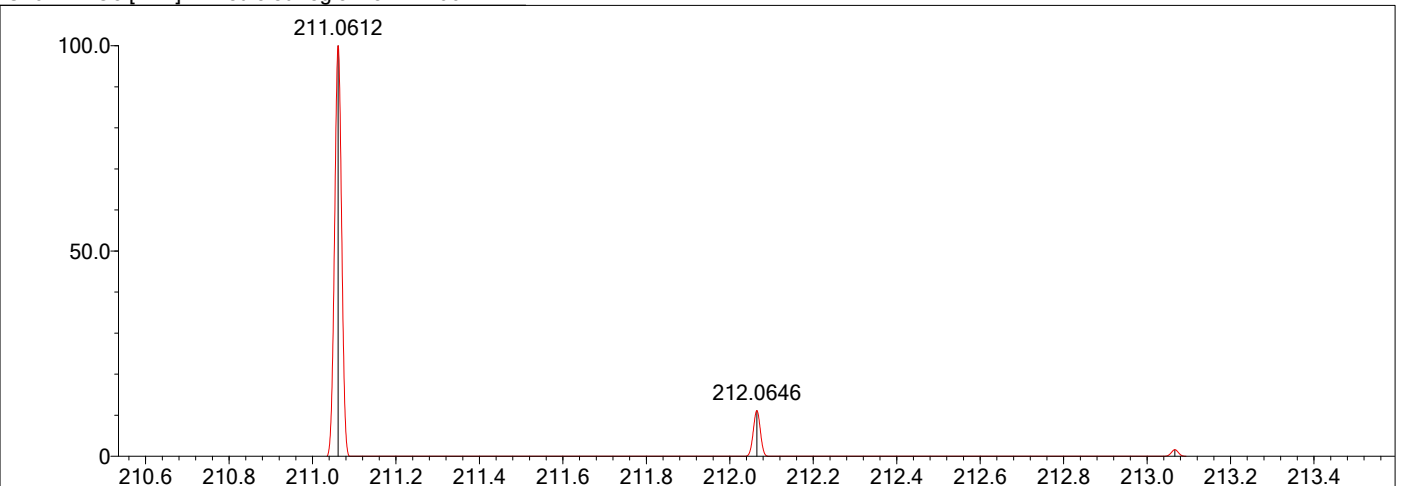

| Rank | Score | Formula (M) | Ion    | Meas. m/z | Pred. m/z | Df. (mDa) | Df. (ppm) | Iso   | DBE |
|------|-------|-------------|--------|-----------|-----------|-----------|-----------|-------|-----|
| 1    | 78.59 | C10 H12 O5  | [M-H]- | 211.0622  | 211.0612  | 1.0       | 4.74      | 86.70 | 5.0 |

Data File: F:\高分辨数据\Zouyong\SXH\SJF-4V.lcd

| Elmt | Val. | Min | Max | Use Adduct |
|------|------|-----|-----|------|------|-----|-----|------|------|-----|-----|------|------|-----|-----|------------|
| H    | 1    | 0   | 8   | N    | 3    | 0   | 0   | P    | 3    | 0   | 0   | Br   | 1    | 0   | 0   | H          |
| B    | 3    | 0   | 0   | O    | 2    | 0   | 5   | S    | 2    | 0   | 0   | I    | 3    | 0   | 0   | HCOO       |
| C    | 4    | 0   | 9   | F    | 1    | 0   | 0   | Cl   | 1    | 0   | 0   |      |      |     |     |            |

Error Margin (ppm): 50  
 HC Ratio: unlimited  
 Max Isotopes: all  
 MSn Iso RI (%): 75.00

DBE Range: -1.0 - 1500.0  
 Apply N Rule: no  
 Isotope RI (%): 1.00  
 MSn Logic Mode: AND

Electron Ions: both  
 Use MSn Info: no  
 Isotope Res: 10000  
 Max Results: 40

4v

Event#: 2 MS(E-) Ret. Time : 0.600 - 0.333 -> 2.508 Scan# : 92 - 52 -> 378

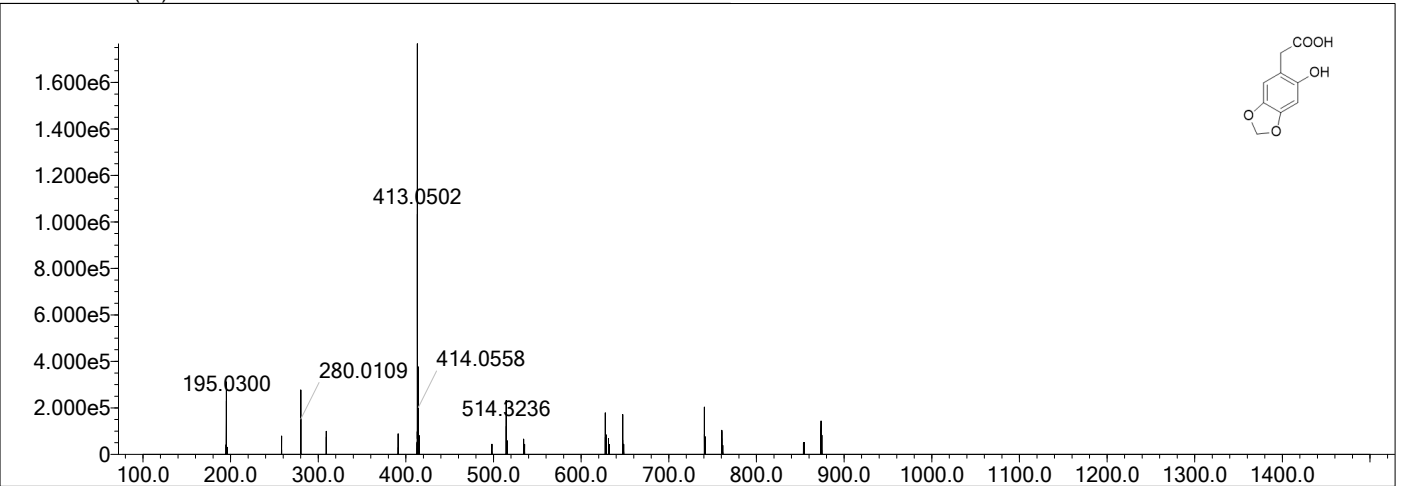

Measured region for 195.0300 m/z

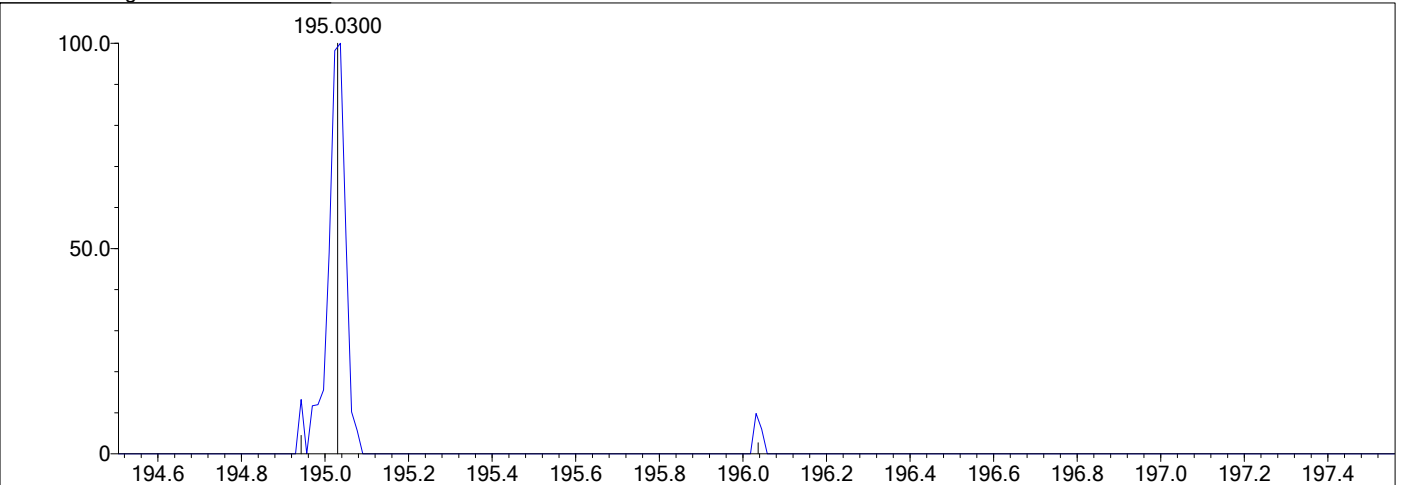

C9 H8 O5 [M-H]- : Predicted region for 195.0299 m/z

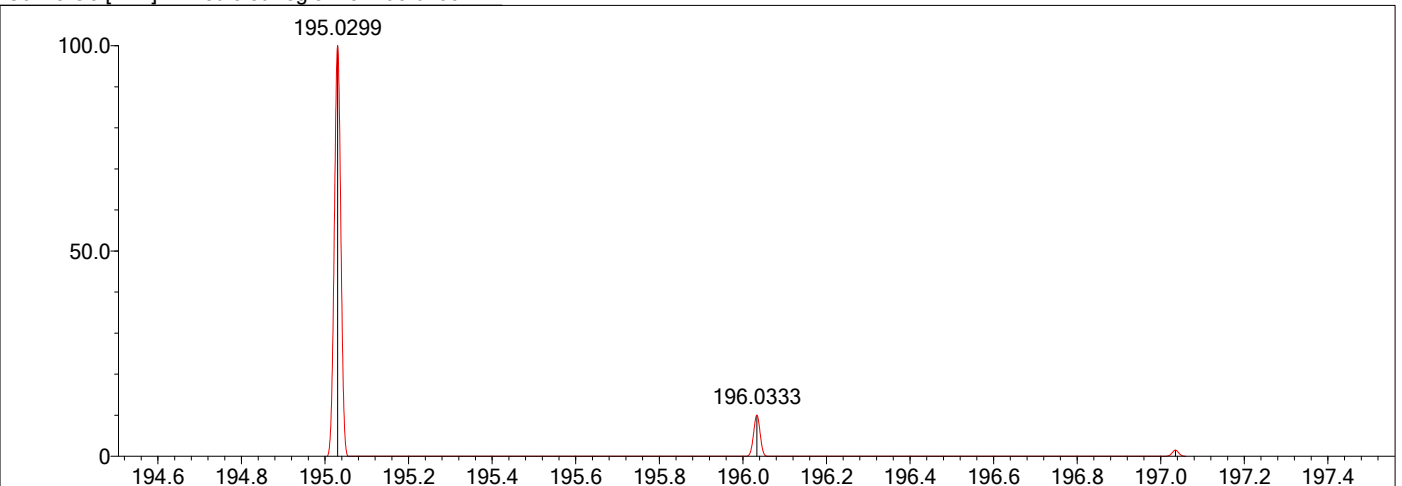

| Rank | Score | Formula (M) | Ion    | Meas. m/z | Pred. m/z | Df. (mDa) | Df. (ppm) | Iso   | DBE |
|------|-------|-------------|--------|-----------|-----------|-----------|-----------|-------|-----|
| 1    | 82.26 | C9 H8 O5    | [M-H]- | 195.0300  | 195.0299  | 0.1       | 0.51      | 82.26 | 6.0 |

Data File: F:\高分辨数据\Zouyong\SXH\SJF-5S.lcd

| Elmt | Val. | Min | Max | Elmt | Val. | Min | Max | Elmt | Val. | Min | Max | Use Adduct |
|------|------|-----|-----|------|------|-----|-----|------|------|-----|-----|------------|
| H    | 1    | 0   | 11  | O    | 2    | 0   | 3   | Cl   | 1    | 0   | 0   | H          |
| B    | 3    | 0   | 0   | F    | 1    | 0   | 0   | Br   | 1    | 0   | 1   | HCOO       |
| C    | 4    | 0   | 10  | P    | 3    | 0   | 0   | I    | 3    | 0   | 0   | CH3COO     |
| N    | 3    | 0   | 0   | S    | 2    | 0   | 0   |      |      |     |     | Cl         |

Error Margin (ppm): 5  
 DBE Range: -1.0 - 1500.0  
 Electron Ions: both  
 HC Ratio: unlimited  
 Apply N Rule: no  
 Use MSn Info: no  
 Max Isotopes: all  
 Isotope RI (%): 1.00  
 Isotope Res: 10000  
 MSn Iso RI (%): 75.00  
 MSn Logic Mode: AND  
 Max Results: 40

5s

Event#: 2 MS(E-) Ret. Time : 0.733 Scan#: 112

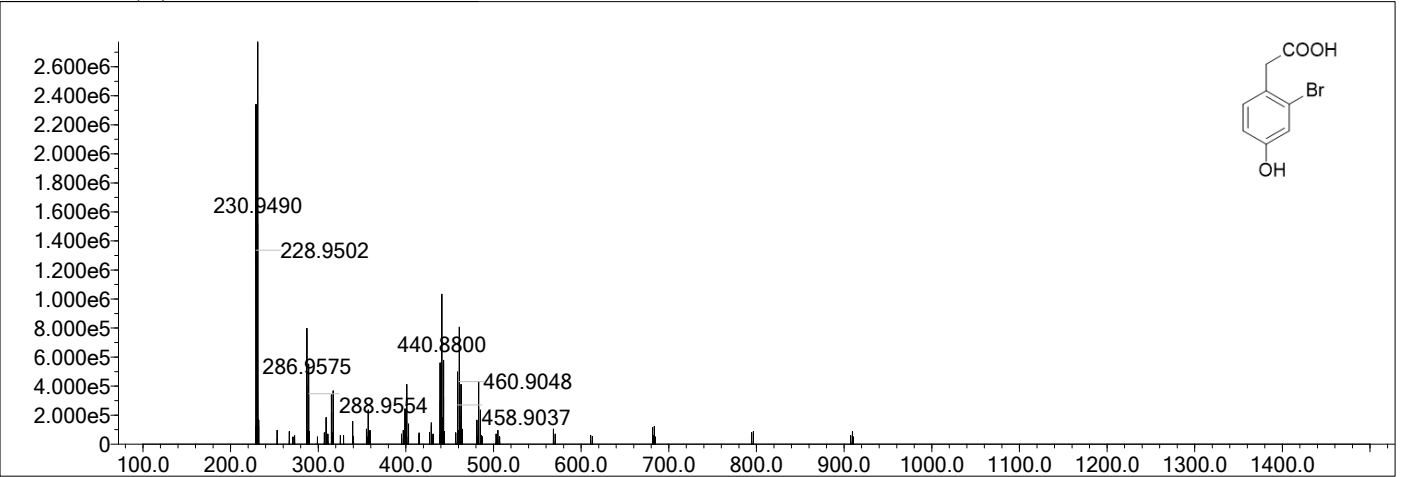

Measured region for 228.9502 m/z

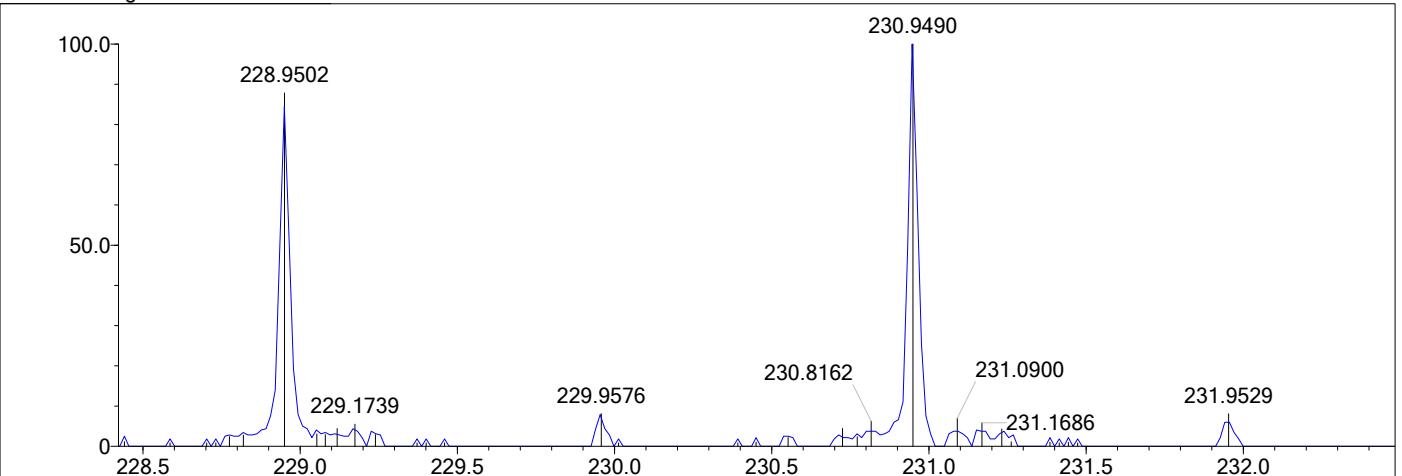

C8 H7 O3 Br [M-H]- : Predicted region for 228.9506 m/z

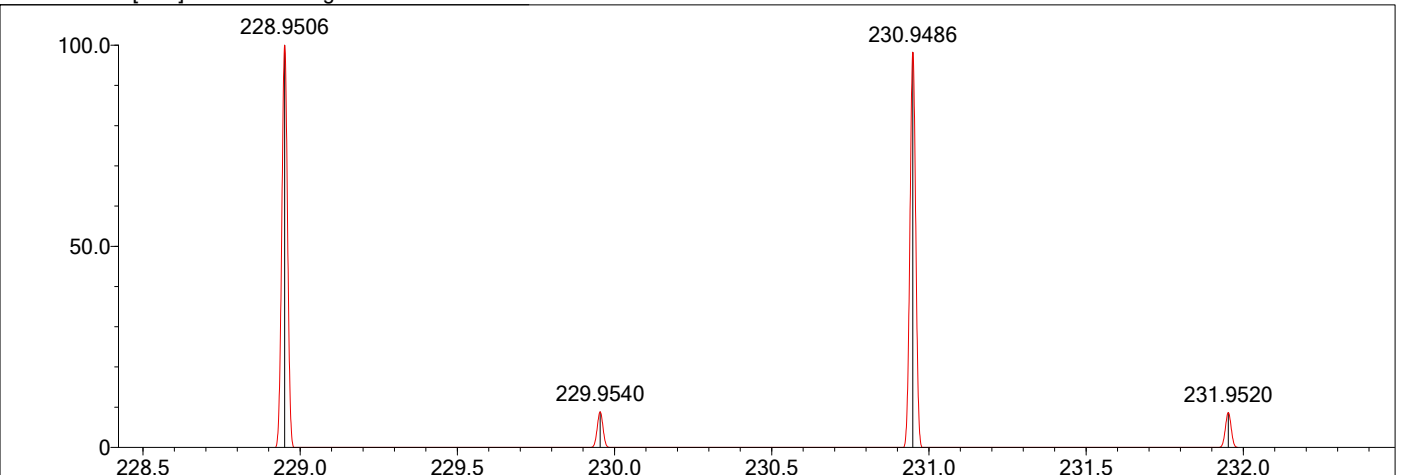

| Rank | Score | Formula (M) | Ion    | Meas. m/z | Pred. m/z | Df. (mDa) | Df. (ppm) | Iso   | DBE |
|------|-------|-------------|--------|-----------|-----------|-----------|-----------|-------|-----|
| 1    | 47.75 | C8 H7 O3 Br | [M-H]- | 228.9502  | 228.9506  | -0.4      | -1.75     | 48.66 | 5.0 |

Data File: F:\高分辨数据\Zouyong\SXH\SJF-5U.lcd

| Elmt | Val. | Min | Max | Use Adduct |
|------|------|-----|-----|------|------|-----|-----|------|------|-----|-----|------|------|-----|-----|------------|
| H    | 1    | 11  | 11  | N    | 3    | 0   | 0   | P    | 3    | 0   | 0   | Br   | 1    | 0   | 1   | H          |
| B    | 3    | 0   | 0   | O    | 2    | 0   | 4   | S    | 2    | 0   | 0   | I    | 3    | 0   | 0   | HCOO       |
| C    | 4    | 10  | 10  | F    | 1    | 0   | 0   | Cl   | 1    | 0   | 0   |      |      |     |     |            |

Error Margin (ppm): 100  
 HC Ratio: unlimited  
 Max Isotopes: all  
 MSn Iso RI (%): 75.00

DBE Range: -1.0 - 1500.0  
 Apply N Rule: no  
 Isotope RI (%): 1.00  
 MSn Logic Mode: AND

Electron Ions: both  
 Use MSn Info: no  
 Isotope Res: 10000  
 Max Results: 40

Event#: 2 MS(E-) Ret. Time : 0.720 Scan#: 110

5u

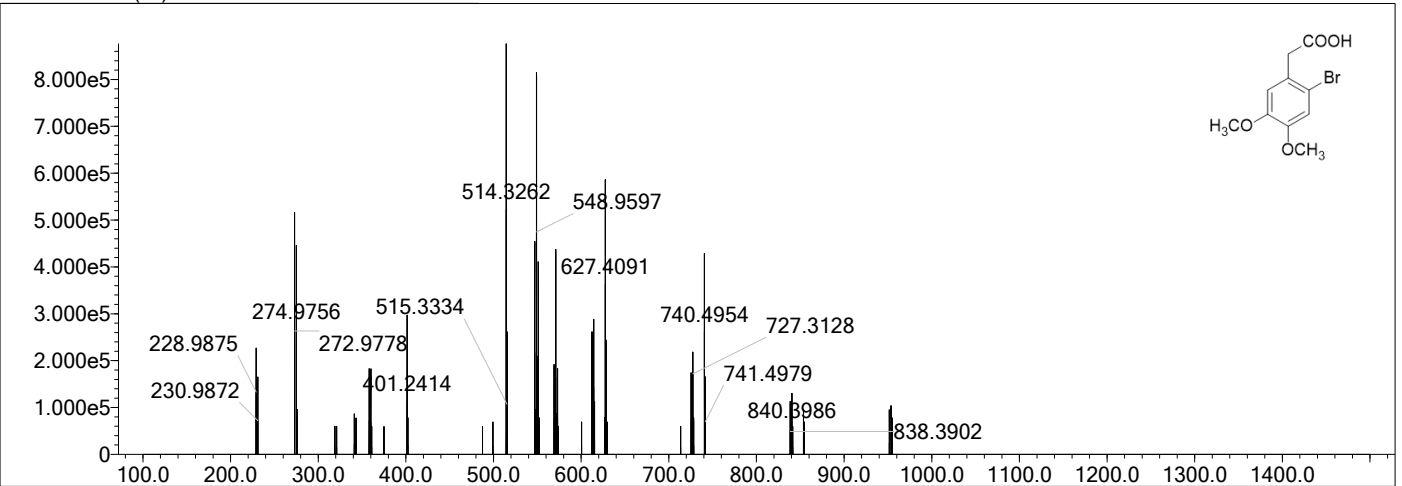

Measured region for 272.9778 m/z

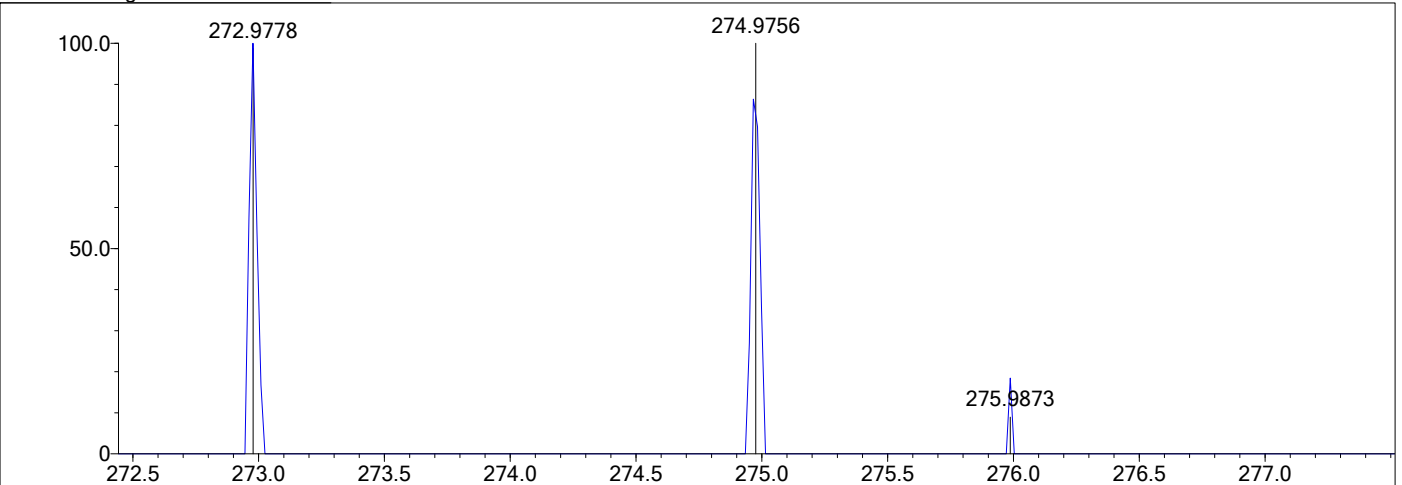

C10 H11 O4 Br [M-H]- : Predicted region for 272.9768 m/z

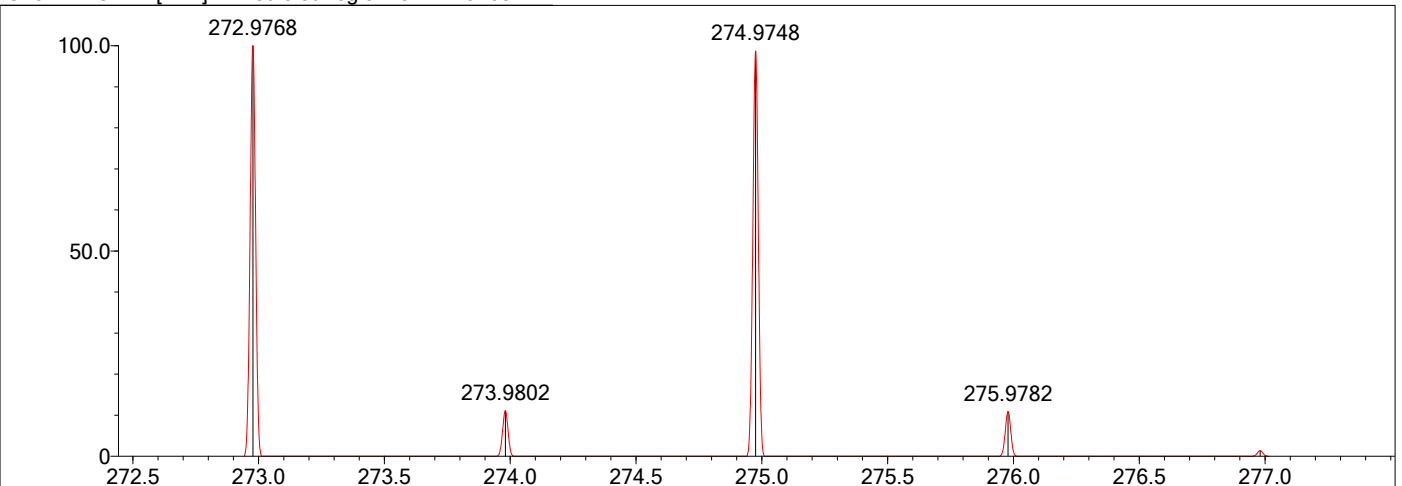

| Rank | Score | Formula (M)   | Ion    | Meas. m/z | Pred. m/z | Df. (mDa) | Df. (ppm) | Iso   | DBE |
|------|-------|---------------|--------|-----------|-----------|-----------|-----------|-------|-----|
| 1    | 28.15 | C10 H11 O4 Br | [M-H]- | 272.9778  | 272.9768  | 1.0       | 3.66      | 30.16 | 5.0 |

Data File: F:\高分辨数据\Zouyong\SXH\SJF-5V.lcd

| Elmt | Val. | Min | Max | Elmt | Val. | Min | Max | Elmt | Val. | Min | Max | Use Adduct |
|------|------|-----|-----|------|------|-----|-----|------|------|-----|-----|------------|
| H    | 1    | 0   | 7   | O    | 2    | 0   | 4   | Cl   | 1    | 0   | 0   | H          |
| B    | 3    | 0   | 0   | F    | 1    | 0   | 0   | Br   | 1    | 0   | 1   | HCOO       |
| C    | 4    | 0   | 9   | P    | 3    | 0   | 0   | I    | 3    | 0   | 0   | CH3COO     |
| N    | 3    | 0   | 0   | S    | 2    | 0   | 0   |      |      |     |     | Cl         |

Error Margin (ppm): 5  
 HC Ratio: unlimited  
 Max Isotopes: all  
 MSn Iso RI (%): 75.00

DBE Range: -1.0 - 1500.0  
 Apply N Rule: no  
 Isotope RI (%): 1.00  
 MSn Logic Mode: AND

Electron Ions: both  
 Use MSn Info: no  
 Isotope Res: 10000  
 Max Results: 40

Event#: 2 MS(E-) Ret. Time : 0.707 Scan# : 108

5v

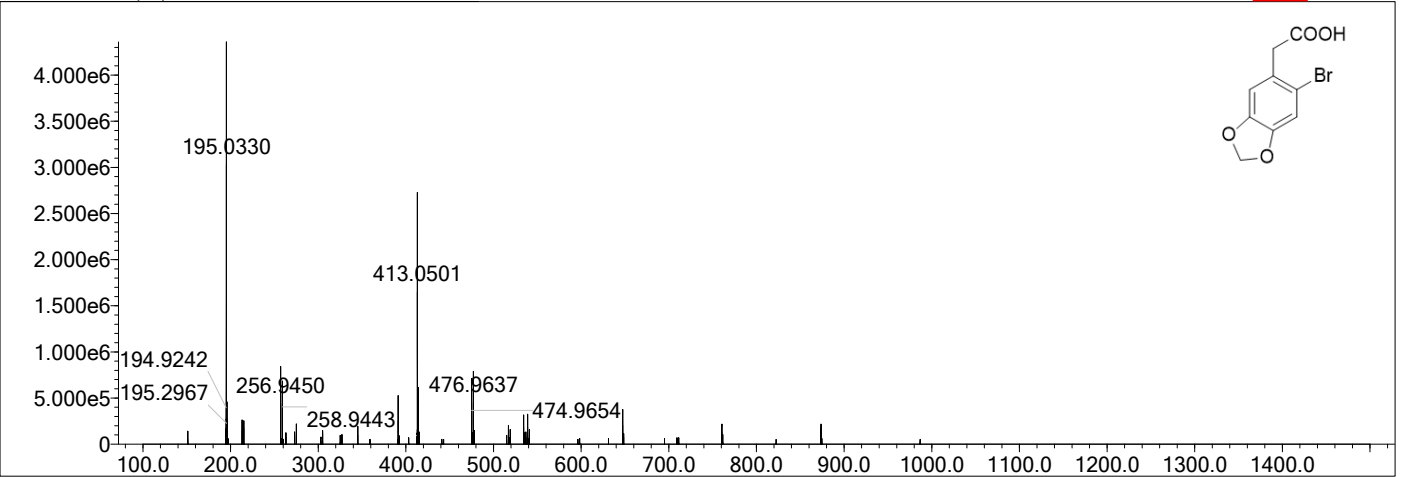

Measured region for 256.9450 m/z

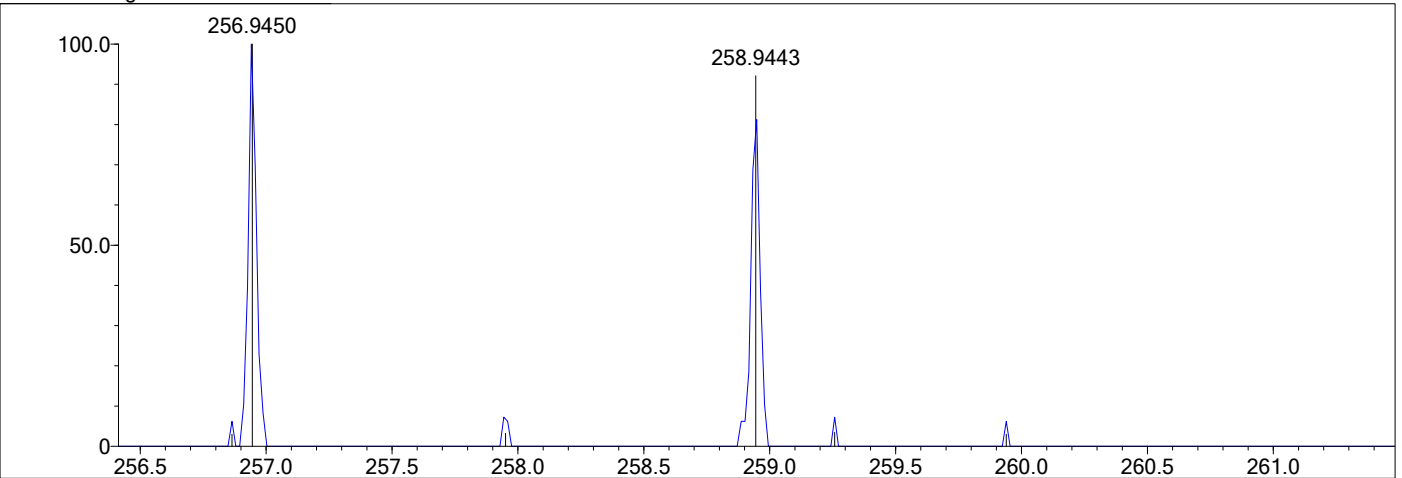

C9 H7 O4 Br [M-H]- : Predicted region for 256.9455 m/z

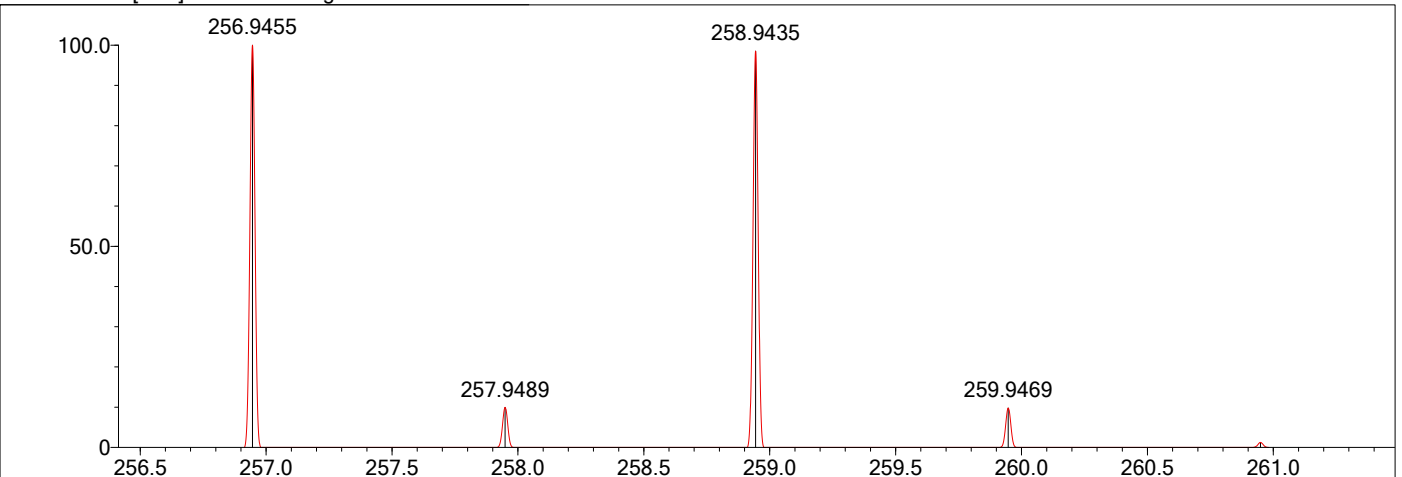

| Rank | Score | Formula (M) | Ion    | Meas. m/z | Pred. m/z | Df. (mDa) | Df. (ppm) | Iso   | DBE |
|------|-------|-------------|--------|-----------|-----------|-----------|-----------|-------|-----|
| 1    | 28.41 | C9 H7 O4 Br | [M-H]- | 256.9450  | 256.9455  | -0.5      | -1.95     | 29.10 | 6.0 |

Data File: F:\高分辨数据\Zouyong\SXH\SJF-7.lcd

| Elmt | Val. | Min | Max | Use Adduct |
|------|------|-----|-----|------|------|-----|-----|------|------|-----|-----|------|------|-----|-----|------------|
| H    | 1    | 7   | 7   | N    | 3    | 0   | 0   | P    | 3    | 0   | 0   | Br   | 1    | 0   | 1   | H          |
| B    | 3    | 0   | 0   | O    | 2    | 0   | 4   | S    | 2    | 0   | 0   | I    | 3    | 0   | 0   | HCOO       |
| C    | 4    | 8   | 8   | F    | 1    | 0   | 0   | Cl   | 1    | 0   | 0   |      |      |     |     |            |

Error Margin (ppm): 100  
 HC Ratio: unlimited  
 Max Isotopes: all  
 MSn Iso RI (%): 75.00

DBE Range: -1.0 - 1500.0  
 Apply N Rule: no  
 Isotope RI (%): 1.00  
 MSn Logic Mode: AND

Electron Ions: both  
 Use MSn Info: no  
 Isotope Res: 10000  
 Max Results: 40

Event#: 2 MS(E-) Ret. Time : 0.733 - 0.493 -> 2.537 Scan#: 112 - 76 -> 382

7

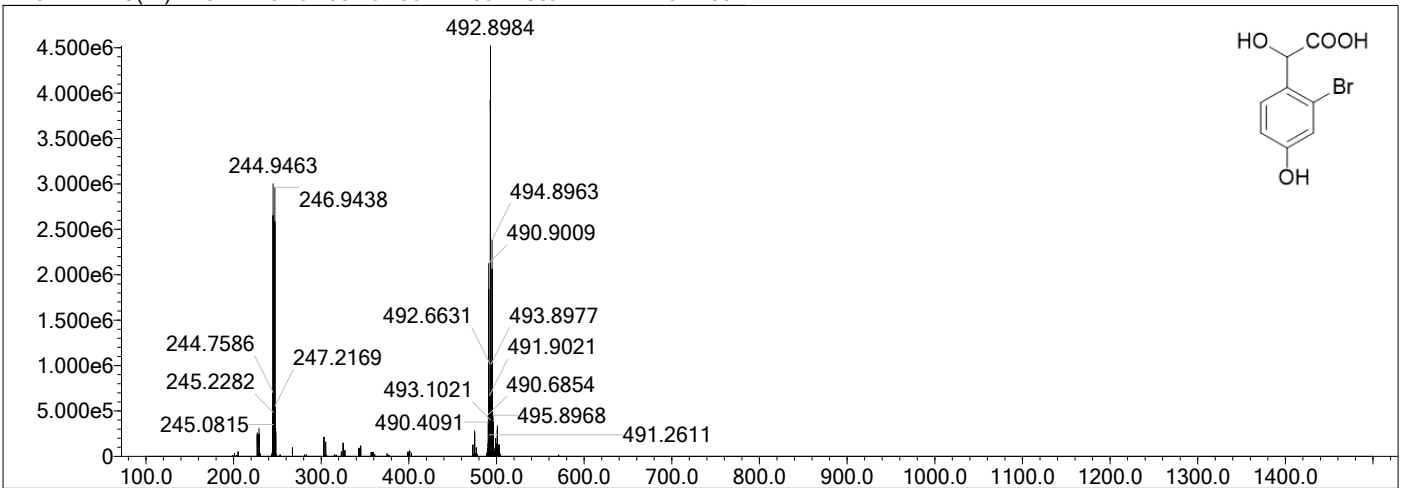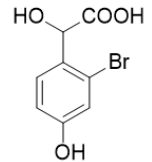

Measured region for 244.9463 m/z

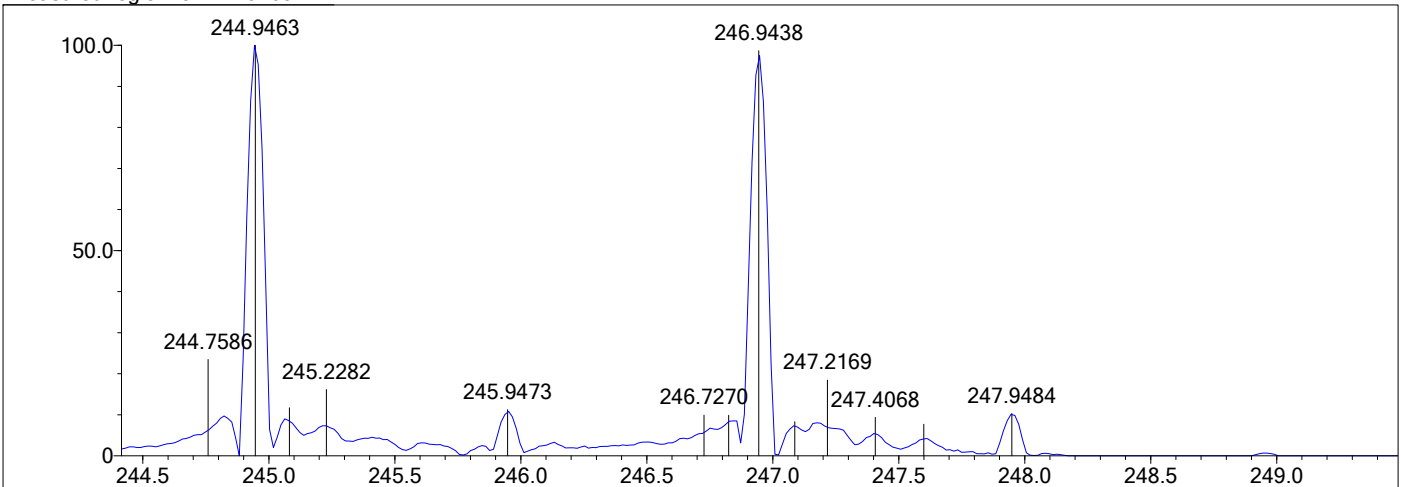

C8 H7 O4 Br [M-H]- : Predicted region for 244.9455 m/z

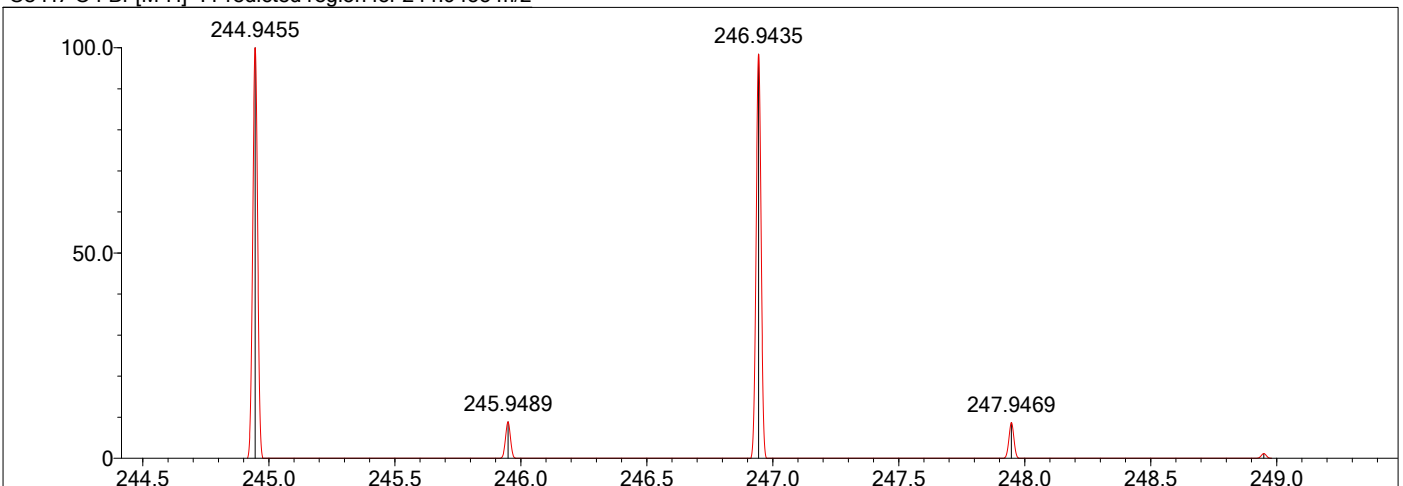

| Rank | Score | Formula (M) | Ion    | Meas. m/z | Pred. m/z | Df. (mDa) | Df. (ppm) | Iso   | DBE |
|------|-------|-------------|--------|-----------|-----------|-----------|-----------|-------|-----|
| 1    | 80.24 | C8 H7 O4 Br | [M-H]- | 244.9463  | 244.9455  | 0.8       | 3.27      | 85.07 | 5.0 |

Data File: \\Deep-20160624\data1\邹永\SXH\SJF-2W.lcd

| Elmt | Val. | Min | Max | Use Adduct |
|------|------|-----|-----|------|------|-----|-----|------|------|-----|-----|------|------|-----|-----|------------|
| H    | 1    | 0   | 80  | O    | 2    | 0   | 7   | K    | 1    | 0   | 0   | Pd   | 2    | 0   | 0   | H          |
| 2H   | 1    | 0   | 0   | F    | 1    | 0   | 0   | Mn   | 3    | 0   | 0   | I    | 3    | 0   | 0   | Na         |
| 3H   | 1    | 0   | 0   | Si   | 4    | 0   | 0   | Fe   | 2    | 0   | 0   | Pt   | 2    | 0   | 0   | K          |
| B    | 3    | 0   | 0   | P    | 3    | 0   | 0   | Cu   | 2    | 0   | 0   | Au   | 1    | 0   | 0   |            |
| C    | 4    | 0   | 30  | S    | 2    | 0   | 0   | Se   | 2    | 0   | 0   |      |      |     |     |            |
| N    | 3    | 0   | 8   | Cl   | 1    | 0   | 0   | Br   | 1    | 0   | 0   |      |      |     |     |            |

Error Margin (ppm): 50  
 HC Ratio: 0.0 - 20.0  
 Max Isotopes: all  
 MSn Iso RI (%): 75.00

DBE Range: -100.0 - 1000.0  
 Apply N Rule: yes  
 Isotope RI (%): 1.00  
 MSn Logic Mode: AND

Electron Ions: both  
 Use MSn Info: no  
 Isotope Res: 10000  
 Max Results: 2000

Event#: 1 MS(E+) Ret. Time : 0.200 Scan#: 31

2w

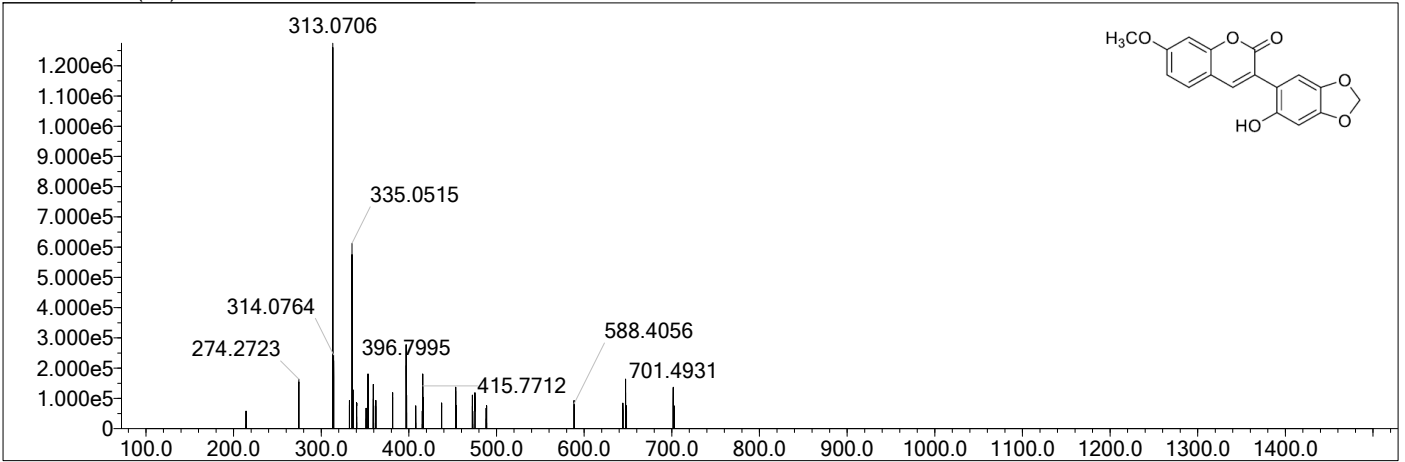

Measured region for 313.0706 m/z

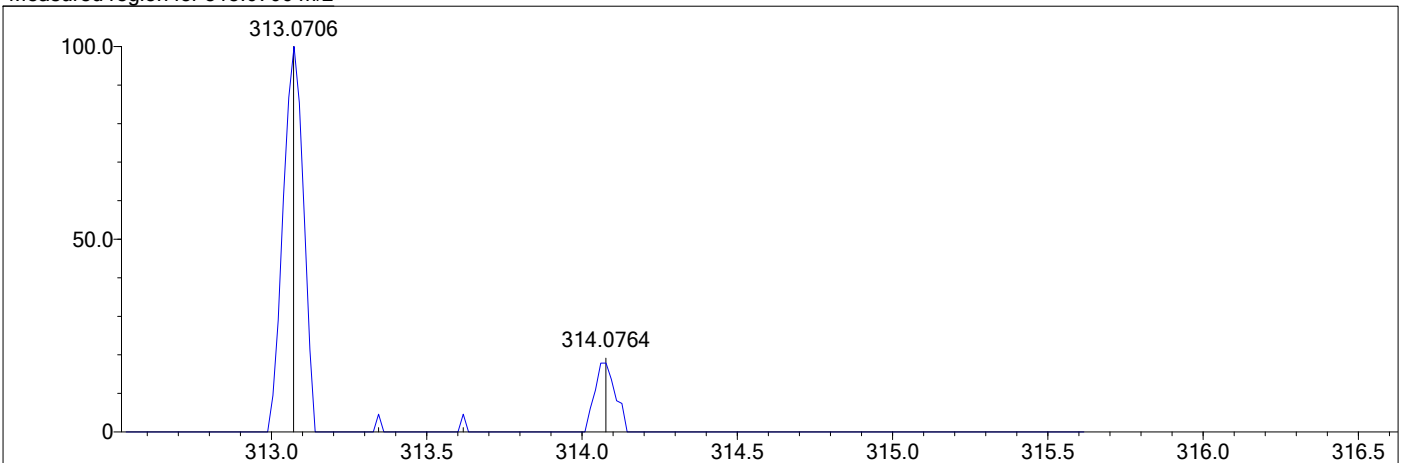

C17 H12 O6 [M+H]+ : Predicted region for 313.0707 m/z

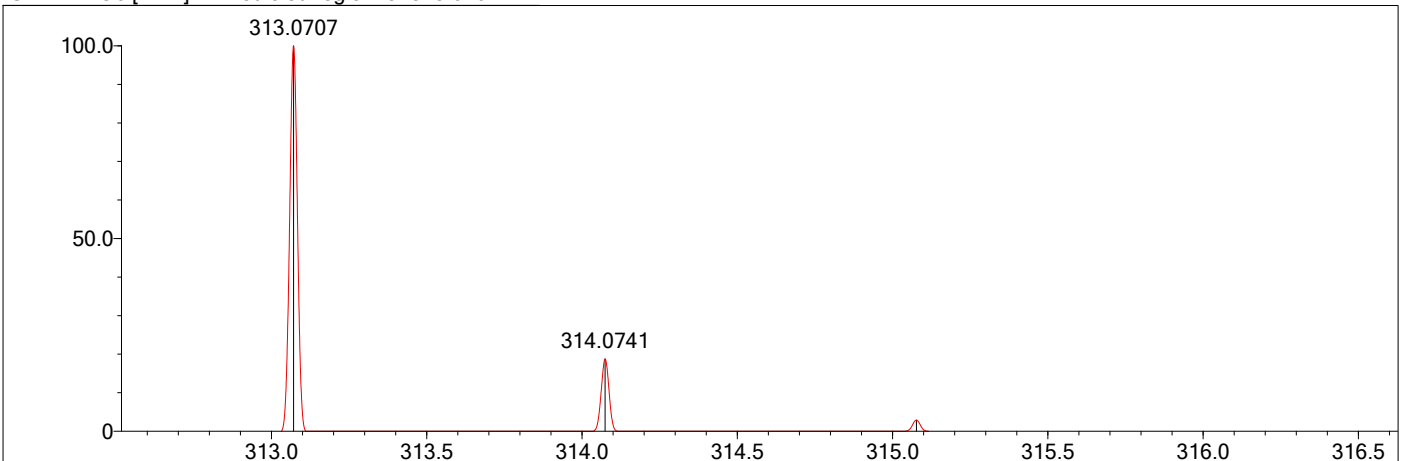

| Rank | Score | Formula (M) | Ion                | Meas. m/z | Pred. m/z | Df. (mDa) | Df. (ppm) | Iso   | DBE  |
|------|-------|-------------|--------------------|-----------|-----------|-----------|-----------|-------|------|
| 1    | 86.96 | C17 H12 O6  | [M+H] <sup>+</sup> | 313.0706  | 313.0707  | -0.1      | -0.32     | 86.96 | 12.0 |
