# Supplementary material for: Copper-catalyzed intramolecular cross dehydrogenative coupling approach to coumestans from 2′-hydroxyl-3-arylcoumarins
Source: PubMed Central journal article supplement — RSC Adv. 2019 Jun 3;9(30):17391–8. doi: 10.1039/c9ra01909j (PMC9064580; doi:10.1039/c9ra01909j), 2019-06-03
Supplement: RA-009-C9RA01909J-s001.pdf [file RA-009-C9RA01909J-s001.pdf]

Data File: F:\高分辨数据\Zouyong\sjf\S1.lcd

| Elmt | Val. | Min | Max | Use Adduct |
|------|------|-----|-----|------|------|-----|-----|------|------|-----|-----|------|------|-----|-----|------------|
| H    | 1    | 0   | 80  | O    | 2    | 0   | 20  | P    | 3    | 0   | 0   | Zn   | 2    | 0   | 0   | H          |
| 2H   | 1    | 0   | 0   | 18O  | 2    | 0   | 0   | S    | 2    | 0   | 0   | Se   | 2    | 0   | 0   |            |
| B    | 3    | 0   | 0   | F    | 1    | 0   | 0   | Cl   | 1    | 0   | 0   | Br   | 1    | 0   | 0   |            |
| C    | 4    | 0   | 60  | Na   | 1    | 0   | 0   | K    | 1    | 0   | 0   |      |      |     |     |            |
| N    | 3    | 0   | 0   | Si   | 4    | 0   | 0   | Mn   | 3    | 0   | 0   |      |      |     |     |            |
|      |      |     |     |      |      |     |     |      |      |     |     |      |      |     |     |            |

Error Margin (ppm): 100  
 HC Ratio: unlimited  
 Max Isotopes: all  
 MSn Iso RI (%): 75.00

DBE Range: -2.0 - 1000.0  
 Apply N Rule: yes  
 Isotope RI (%): 1.00  
 MSn Logic Mode: AND

Electron Ions: both  
 Use MSn Info: no  
 Isotope Res: 10000  
 Max Results: 500

**1a**

Event#: 1 MS(E+) Ret. Time : 1.240 Scan# : 187

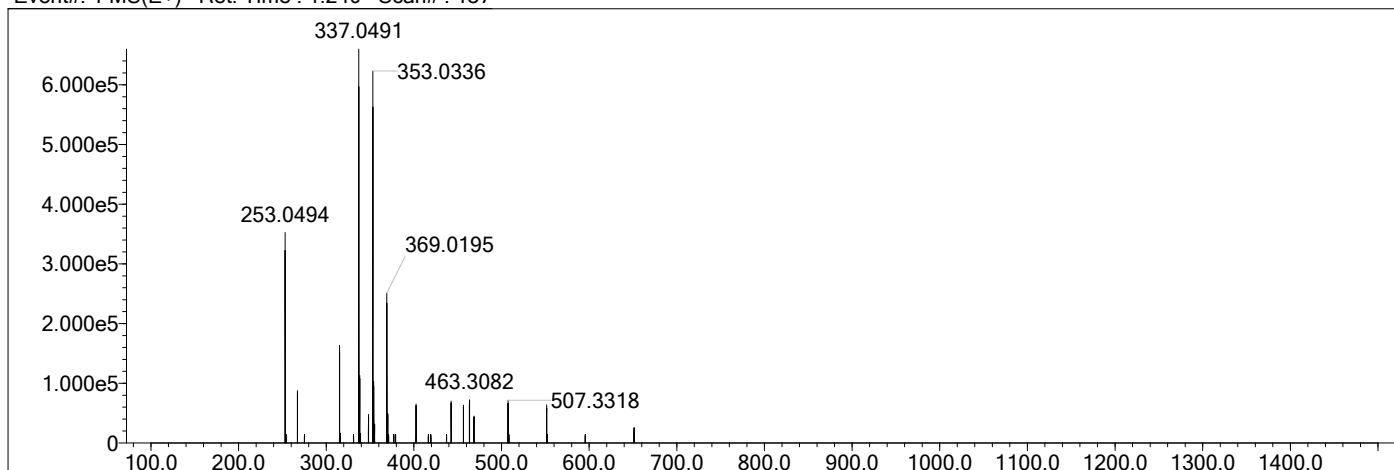

Measured region for 253.0494 m/z

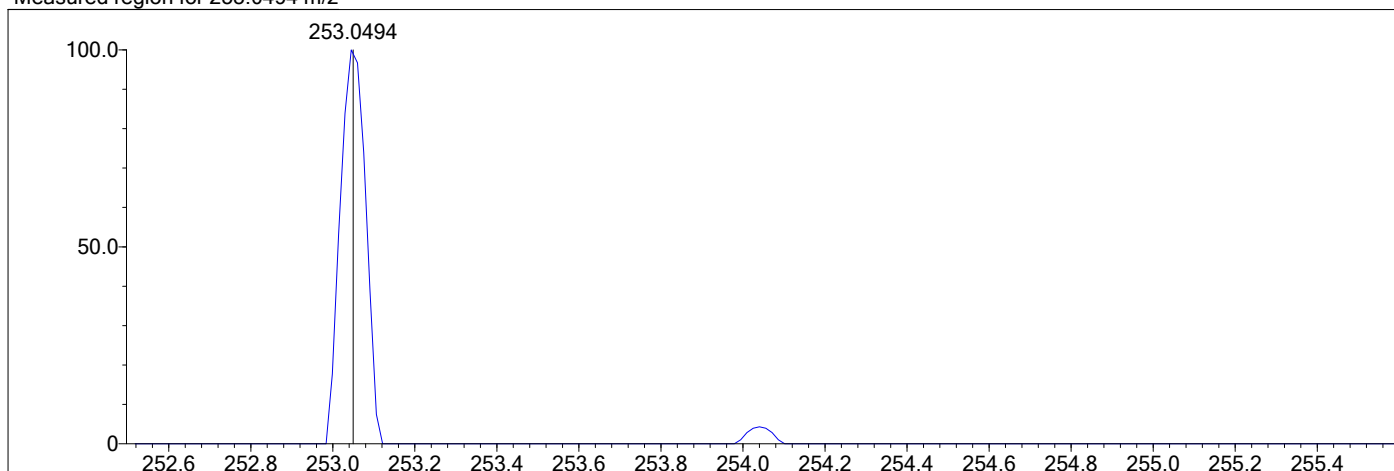

C15 H8 O4 [M+H]+ : Predicted region for 253.0495 m/z

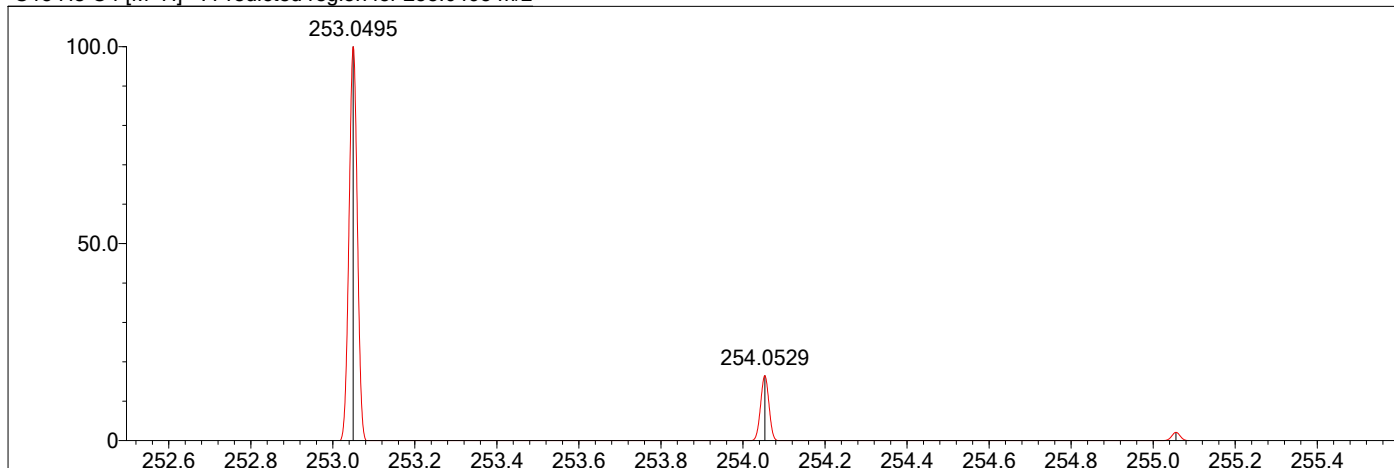

| Rank | Score | Formula (M) | Ion    | Meas. m/z | Pred. m/z | Df. (mDa) | Df. (ppm) | Iso   | DBE  |
|------|-------|-------------|--------|-----------|-----------|-----------|-----------|-------|------|
| 1    | 35.19 | C15 H8 O4   | [M+H]+ | 253.0494  | 253.0495  | -0.1      | -0.40     | 35.19 | 12.0 |

Data File: \\Deep-20160624Id\data1\邹永\SXH\SJF-1B.lcd

| Elmt | Val. | Min | Max | Use Adduct |
|------|------|-----|-----|------|------|-----|-----|------|------|-----|-----|------|------|-----|-----|------------|
| H    | 1    | 6   | 8   | O    | 2    | 2   | 3   | K    | 1    | 0   | 0   | Pd   | 2    | 0   | 0   | H          |
| 2H   | 1    | 0   | 0   | F    | 1    | 0   | 0   | Mn   | 3    | 0   | 0   | I    | 3    | 0   | 0   | Na         |
| 3H   | 1    | 0   | 0   | Si   | 4    | 0   | 0   | Fe   | 2    | 0   | 0   | Pt   | 2    | 0   | 0   |            |
| B    | 3    | 0   | 0   | P    | 3    | 0   | 0   | Cu   | 2    | 0   | 0   | Au   | 1    | 0   | 0   |            |
| C    | 4    | 14  | 15  | S    | 2    | 0   | 0   | Se   | 2    | 0   | 0   |      |      |     |     |            |
| N    | 3    | 0   | 0   | Cl   | 1    | 0   | 0   | Br   | 1    | 0   | 0   |      |      |     |     |            |

Error Margin (ppm): 100  
 HC Ratio: 0.0 - 100.0  
 Max Isotopes: all  
 MSn Iso RI (%): 75.00

DBE Range: -100.0 - 200.0  
 Apply N Rule: yes  
 Isotope RI (%): 1.00  
 MSn Logic Mode: AND

Electron Ions: both  
 Use MSn Info: no  
 Isotope Res: 10000  
 Max Results: 100

**1b**

Event#: 1 MS(E+) Ret. Time : 1.120 -> 1.120 Scan# : 169 -> 169

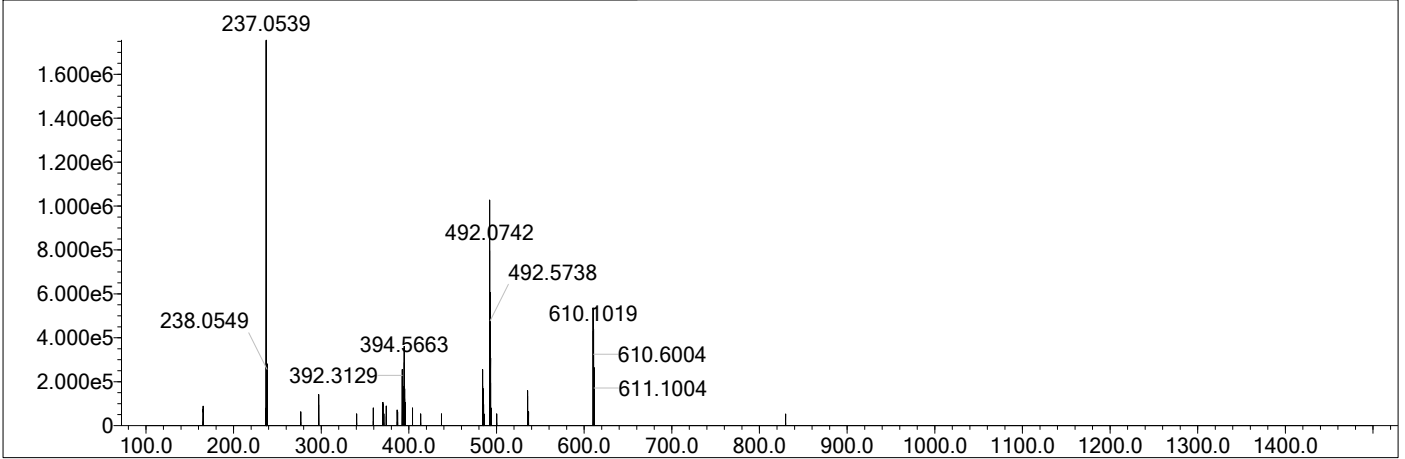

Measured region for 237.0539 m/z

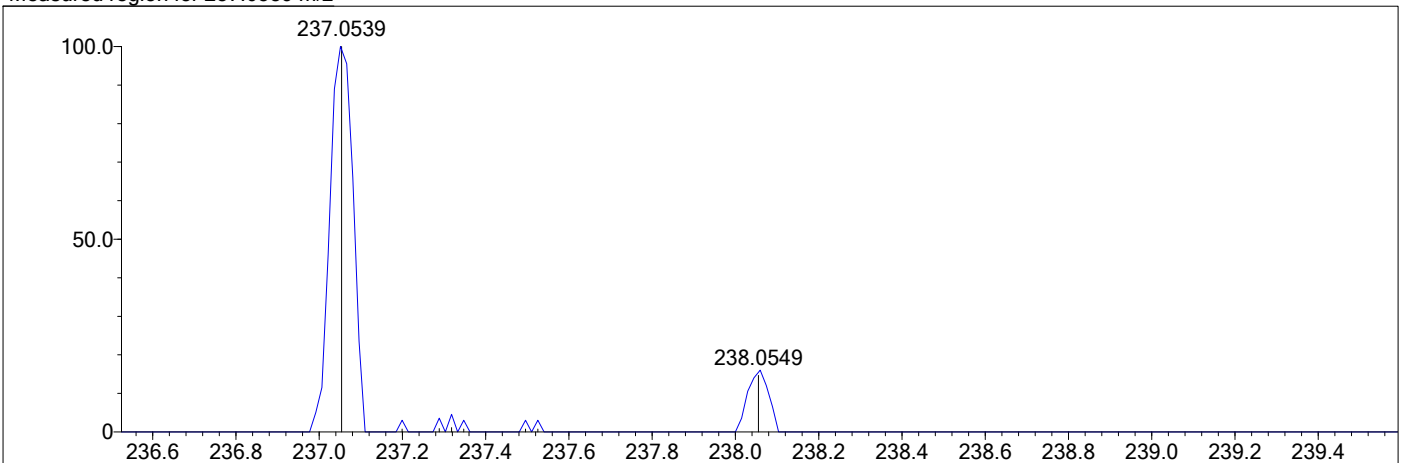

C15 H8 O3 [M+H]+ : Predicted region for 237.0546 m/z

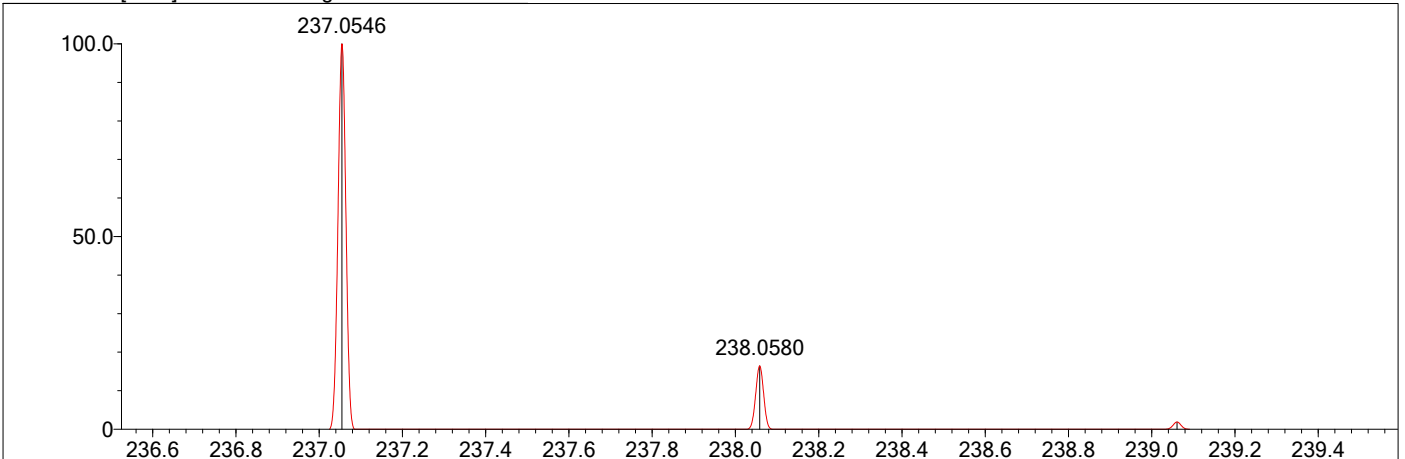

| Rank | Score | Formula (M) | Ion    | Meas. m/z | Pred. m/z | Df. (mDa) | Df. (ppm) | Iso   | DBE  |
|------|-------|-------------|--------|-----------|-----------|-----------|-----------|-------|------|
| 1    | 79.22 | C15 H8 O3   | [M+H]+ | 237.0539  | 237.0546  | -0.7      | -2.95     | 83.28 | 12.0 |

Data File: F:\高分辨数据\Zouyong\sjf\S2.lcd

| Elmt | Val. | Min | Max | Use Adduct |
|------|------|-----|-----|------|------|-----|-----|------|------|-----|-----|------|------|-----|-----|------------|
| H    | 1    | 0   | 80  | O    | 2    | 0   | 20  | P    | 3    | 0   | 0   | Zn   | 2    | 0   | 0   | H          |
| 2H   | 1    | 0   | 0   | 18O  | 2    | 0   | 0   | S    | 2    | 0   | 0   | Se   | 2    | 0   | 0   |            |
| B    | 3    | 0   | 0   | F    | 1    | 0   | 0   | Cl   | 1    | 0   | 0   | Br   | 1    | 0   | 0   |            |
| C    | 4    | 0   | 60  | Na   | 1    | 0   | 0   | K    | 1    | 0   | 0   |      |      |     |     |            |
| N    | 3    | 0   | 0   | Si   | 4    | 0   | 0   | Mn   | 3    | 0   | 0   |      |      |     |     |            |
|      |      |     |     |      |      |     |     |      |      |     |     |      |      |     |     |            |

Error Margin (ppm): 100  
 HC Ratio: unlimited  
 Max Isotopes: all  
 MSn Iso RI (%): 75.00

DBE Range: -2.0 - 1000.0  
 Apply N Rule: yes  
 Isotope RI (%): 1.00  
 MSn Logic Mode: AND

Electron Ions: both  
 Use MSn Info: no  
 Isotope Res: 10000  
 Max Results: 500

**1c**

Event#: 1 MS(E+) Ret. Time : 1.507 Scan# : 227

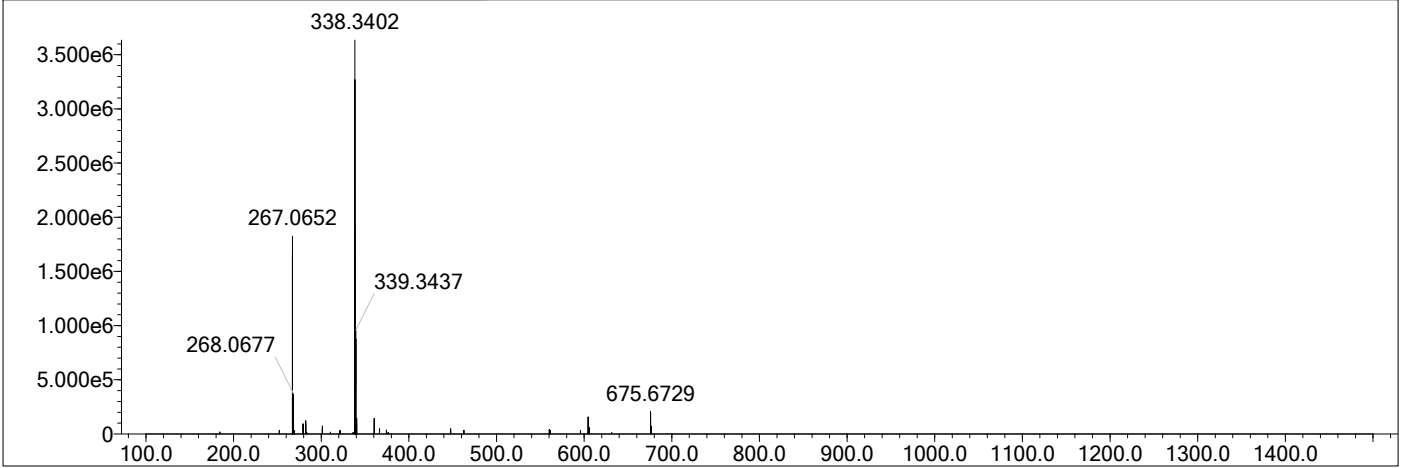

Measured region for 267.0652 m/z

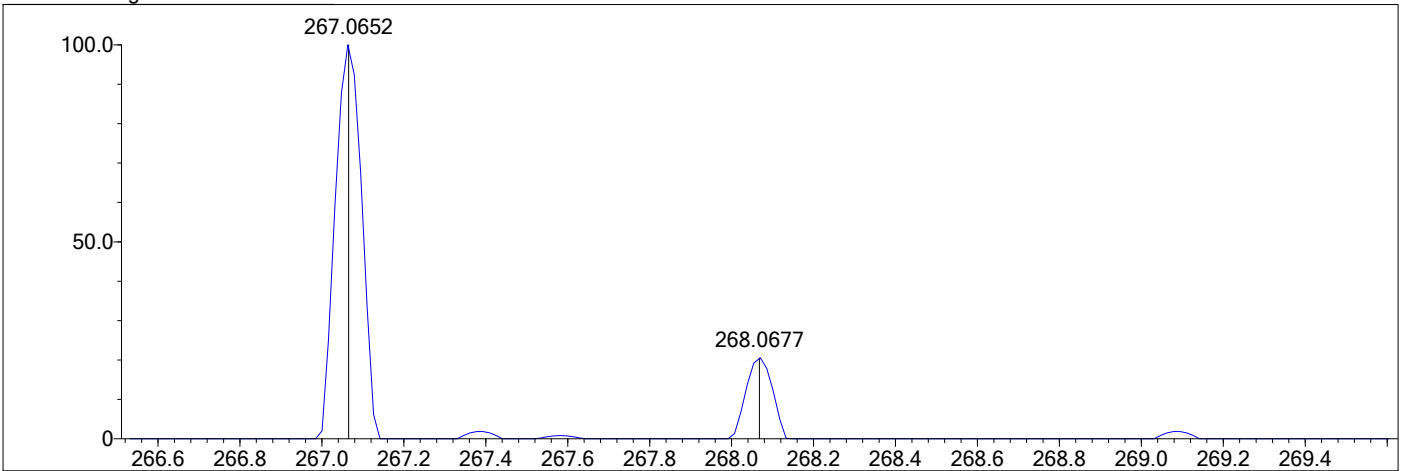

C16 H10 O4 [M+H]<sup>+</sup> : Predicted region for 267.0652 m/z

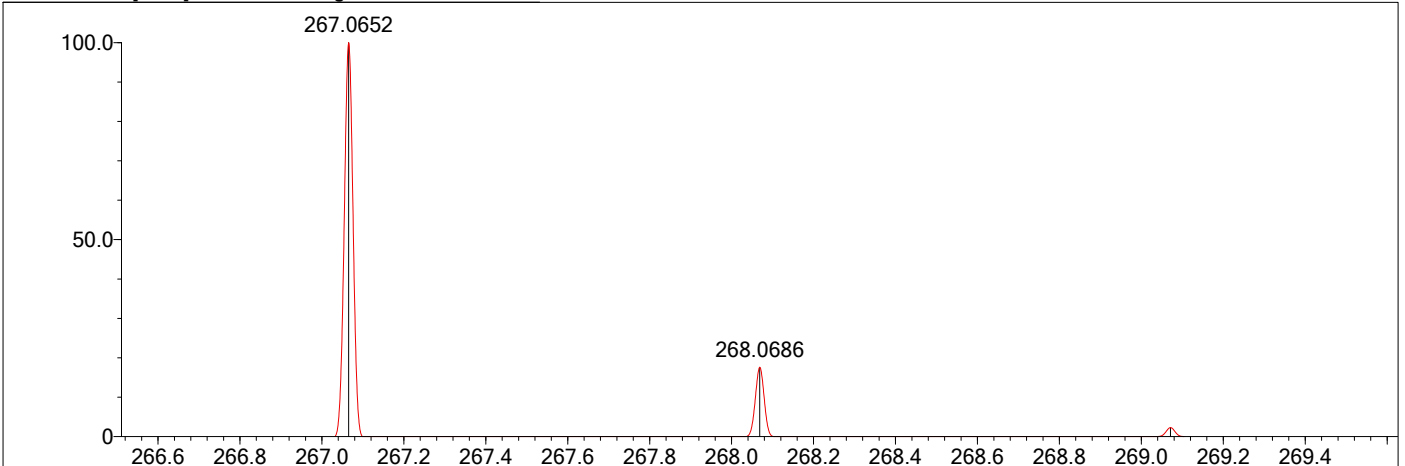

| Rank | Score | Formula (M) | Ion                | Meas. m/z | Pred. m/z | Df. (mDa) | Df. (ppm) | Iso   | DBE  |
|------|-------|-------------|--------------------|-----------|-----------|-----------|-----------|-------|------|
| 1    | 75.33 | C16 H10 O4  | [M+H] <sup>+</sup> | 267.0652  | 267.0652  | 0.0       | 0.00      | 75.33 | 12.0 |

Data File: F:\高分辨数据\Zouyong\sjf\S3.lcd

| Elmt | Val. | Min | Max | Use Adduct |
|------|------|-----|-----|------|------|-----|-----|------|------|-----|-----|------|------|-----|-----|------------|
| H    | 1    | 0   | 80  | O    | 2    | 0   | 20  | P    | 3    | 0   | 0   | Zn   | 2    | 0   | 0   | H          |
| 2H   | 1    | 0   | 0   | 18O  | 2    | 0   | 0   | S    | 2    | 0   | 0   | Se   | 2    | 0   | 0   |            |
| B    | 3    | 0   | 0   | F    | 1    | 0   | 0   | Cl   | 1    | 0   | 0   | Br   | 1    | 0   | 0   |            |
| C    | 4    | 0   | 60  | Na   | 1    | 0   | 0   | K    | 1    | 0   | 0   |      |      |     |     |            |
| N    | 3    | 0   | 0   | Si   | 4    | 0   | 0   | Mn   | 3    | 0   | 0   |      |      |     |     |            |

Error Margin (ppm): 100  
 HC Ratio: unlimited  
 Max Isotopes: all  
 MSn Iso RI (%): 75.00

DBE Range: -2.0 - 1000.0  
 Apply N Rule: yes  
 Isotope RI (%): 1.00  
 MSn Logic Mode: AND

Electron Ions: both  
 Use MSn Info: no  
 Isotope Res: 10000  
 Max Results: 500

**1d**

Event#: 1 MS(E+) Ret. Time : 1.480 Scan# : 223

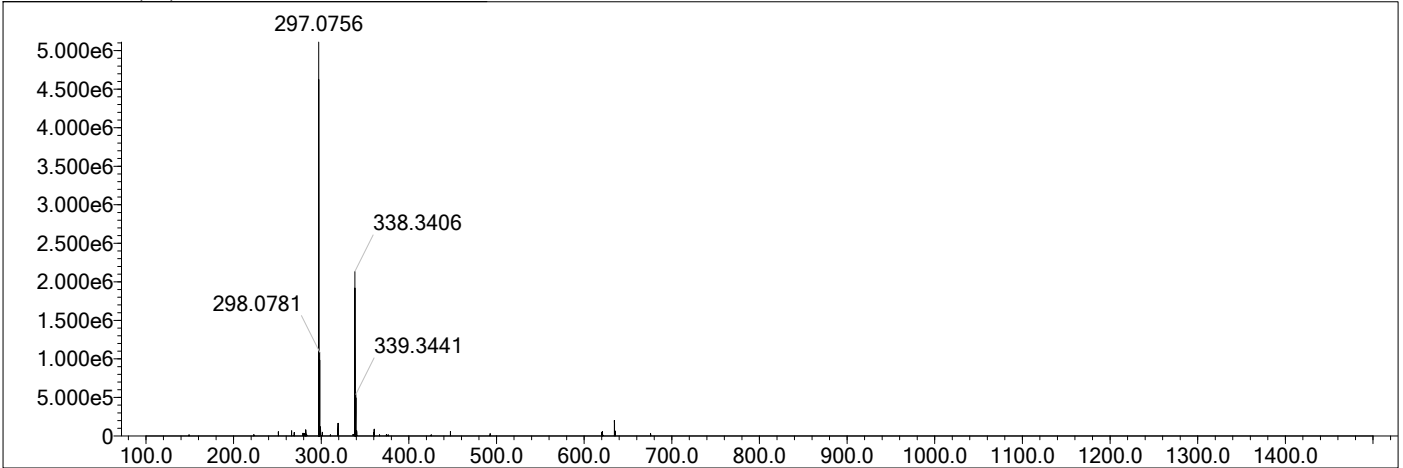

Measured region for 297.0756 m/z

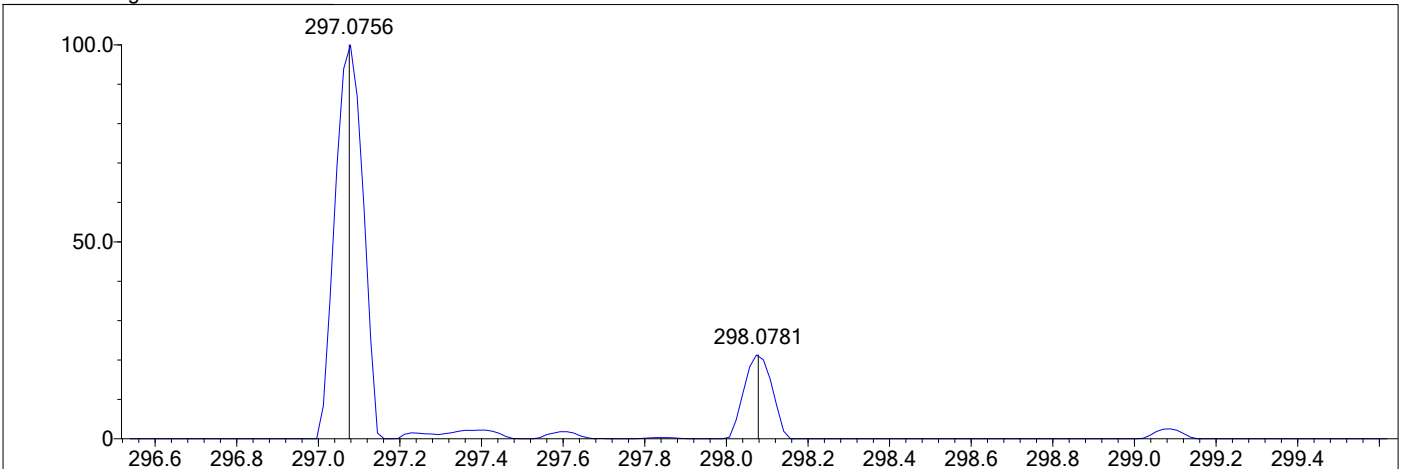

C17 H12 O5 [M+H]<sup>+</sup> : Predicted region for 297.0758 m/z

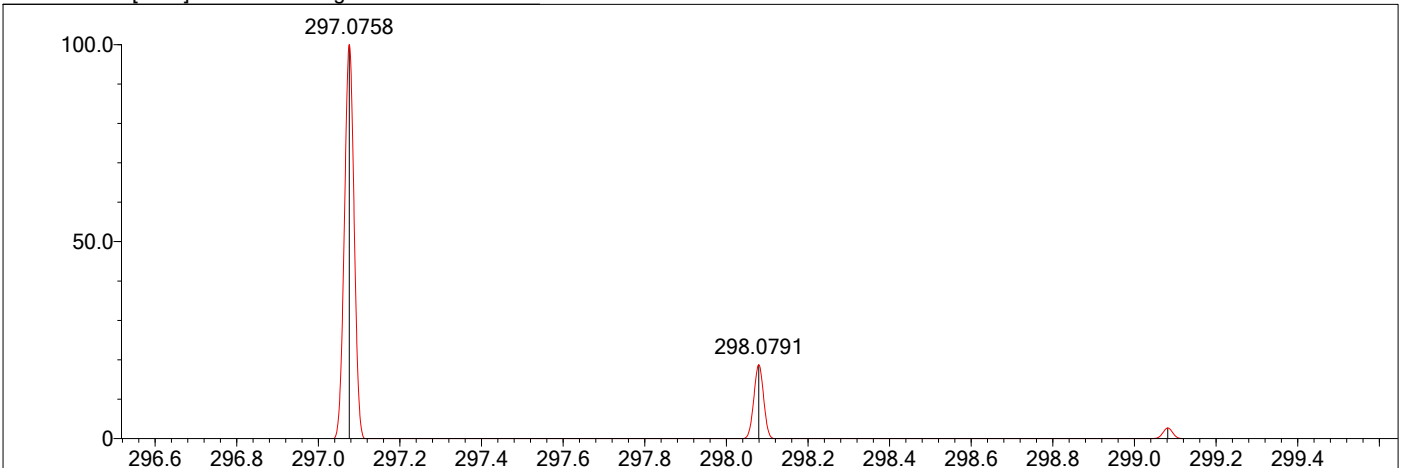

| Rank | Score | Formula (M) | Ion                | Meas. m/z | Pred. m/z | Df. (mDa) | Df. (ppm) | Iso   | DBE  |
|------|-------|-------------|--------------------|-----------|-----------|-----------|-----------|-------|------|
| 1    | 72.99 | C17 H12 O5  | [M+H] <sup>+</sup> | 297.0756  | 297.0758  | -0.2      | -0.67     | 72.99 | 12.0 |

Data File: F:\高分辨数据\Zouyong\sjf\S4.lcd

| Elmt | Val. | Min | Max | Use Adduct |
|------|------|-----|-----|------|------|-----|-----|------|------|-----|-----|------|------|-----|-----|------------|
| H    | 1    | 0   | 80  | O    | 2    | 0   | 20  | P    | 3    | 0   | 0   | Zn   | 2    | 0   | 0   | H          |
| 2H   | 1    | 0   | 0   | 18O  | 2    | 0   | 0   | S    | 2    | 0   | 0   | Se   | 2    | 0   | 0   |            |
| B    | 3    | 0   | 0   | F    | 1    | 0   | 0   | Cl   | 1    | 0   | 0   | Br   | 1    | 0   | 0   |            |
| C    | 4    | 0   | 60  | Na   | 1    | 0   | 0   | K    | 1    | 0   | 0   |      |      |     |     |            |
| N    | 3    | 0   | 0   | Si   | 4    | 0   | 0   | Mn   | 3    | 0   | 0   |      |      |     |     |            |
|      |      |     |     |      |      |     |     |      |      |     |     |      |      |     |     |            |

Error Margin (ppm): 100  
 HC Ratio: unlimited  
 Max Isotopes: all  
 MSn Iso RI (%): 75.00

DBE Range: -2.0 - 1000.0  
 Apply N Rule: yes  
 Isotope RI (%): 1.00  
 MSn Logic Mode: AND

Electron Ions: both  
 Use MSn Info: no  
 Isotope Res: 10000  
 Max Results: 500

1e

Event#: 1 MS(E+) Ret. Time : 1.227 Scan# : 185

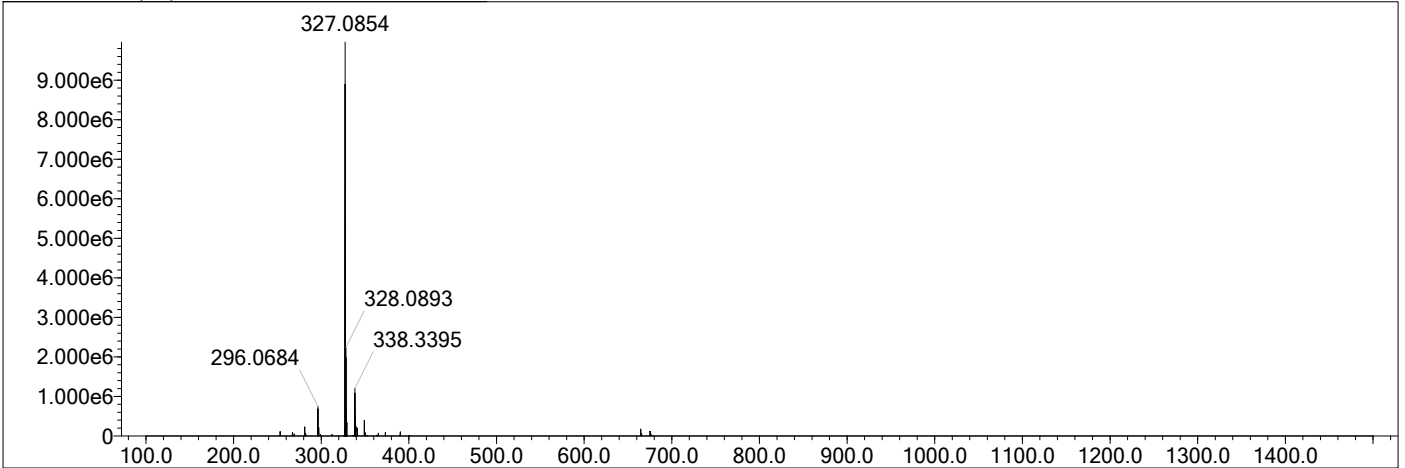

Measured region for 327.0854 m/z

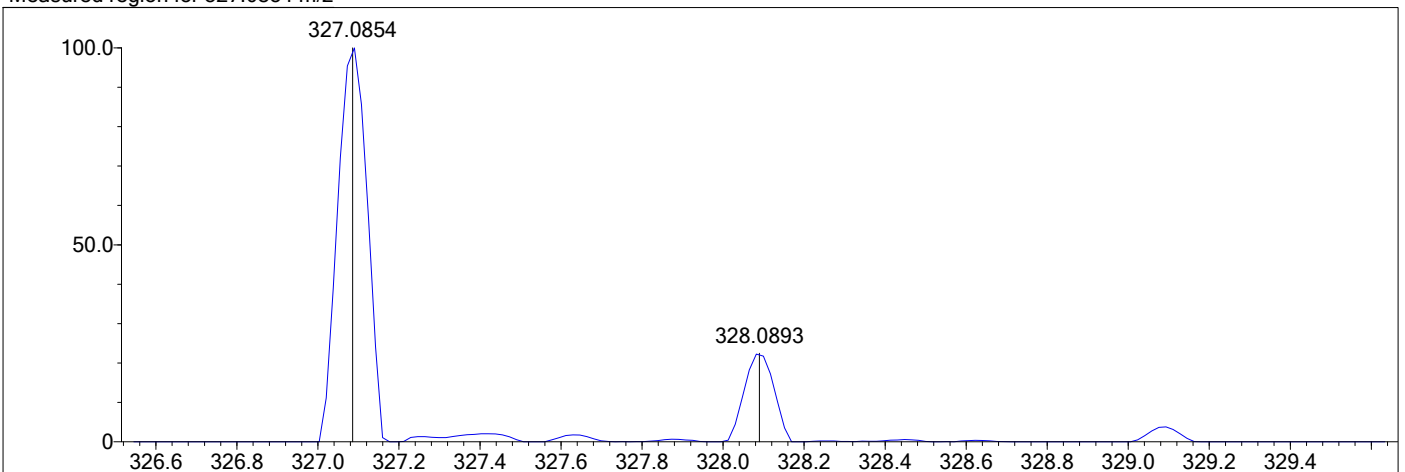

C18 H14 O6 [M+H]<sup>+</sup> : Predicted region for 327.0863 m/z

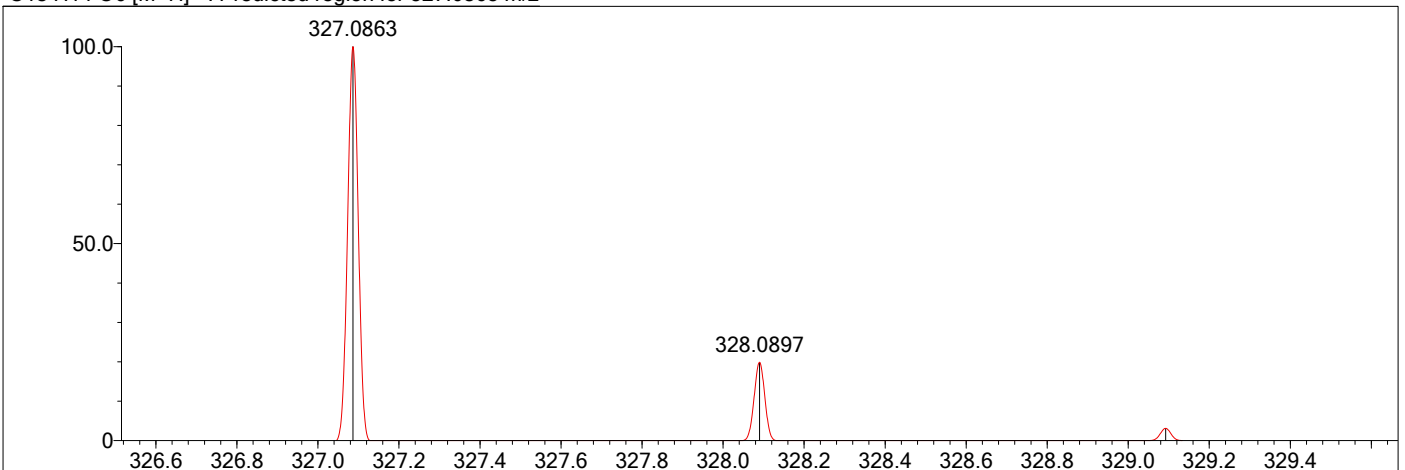

| Rank | Score | Formula (M) | Ion                | Meas. m/z | Pred. m/z | Df. (mDa) | Df. (ppm) | Iso   | DBE  |
|------|-------|-------------|--------------------|-----------|-----------|-----------|-----------|-------|------|
| 1    | 75.67 | C18 H14 O6  | [M+H] <sup>+</sup> | 327.0854  | 327.0863  | -0.9      | -2.75     | 79.13 | 12.0 |

Data File: F:\高分辨数据\Zouyong\sjf\S5.lcd

| Elmt | Val. | Min | Max | Use Adduct |
|------|------|-----|-----|------|------|-----|-----|------|------|-----|-----|------|------|-----|-----|------------|
| H    | 1    | 0   | 80  | O    | 2    | 0   | 20  | P    | 3    | 0   | 0   | Zn   | 2    | 0   | 0   | H          |
| 2H   | 1    | 0   | 0   | 18O  | 2    | 0   | 0   | S    | 2    | 0   | 0   | Se   | 2    | 0   | 0   |            |
| B    | 3    | 0   | 0   | F    | 1    | 0   | 0   | Cl   | 1    | 0   | 0   | Br   | 1    | 0   | 0   |            |
| C    | 4    | 0   | 60  | Na   | 1    | 0   | 0   | K    | 1    | 0   | 0   |      |      |     |     |            |
| N    | 3    | 0   | 0   | Si   | 4    | 0   | 0   | Mn   | 3    | 0   | 0   |      |      |     |     |            |
|      |      |     |     |      |      |     |     |      |      |     |     |      |      |     |     |            |

Error Margin (ppm): 100  
 HC Ratio: unlimited  
 Max Isotopes: all  
 MSn Iso RI (%): 75.00

DBE Range: -2.0 - 1000.0  
 Apply N Rule: yes  
 Isotope RI (%): 1.00  
 MSn Logic Mode: AND

Electron Ions: both  
 Use MSn Info: no  
 Isotope Res: 10000  
 Max Results: 500

1f

Event#: 1 MS(E+) Ret. Time : 1.320 Scan# : 199

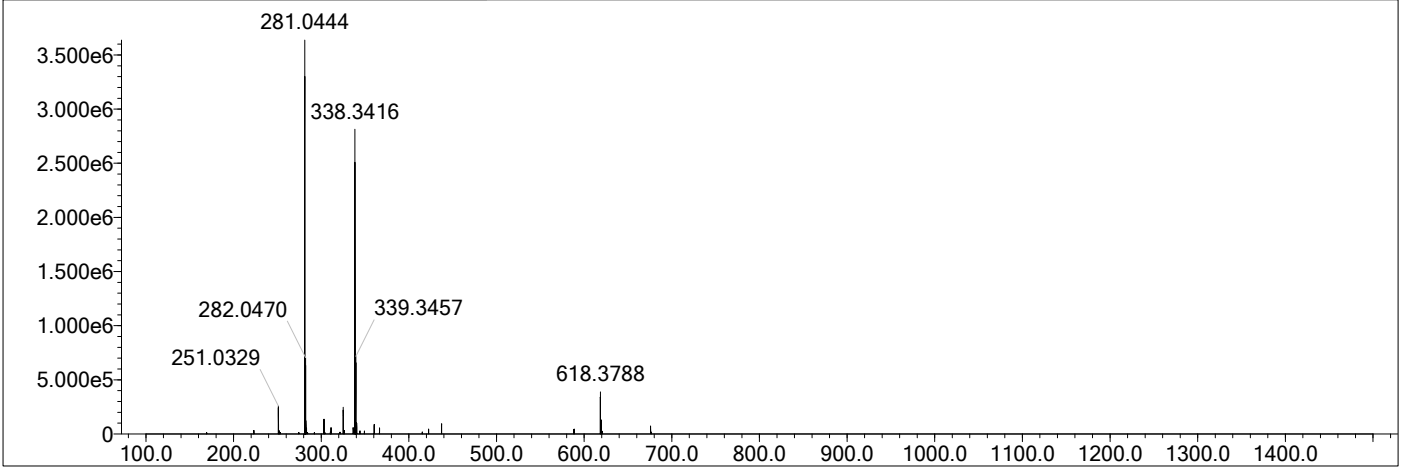

Measured region for 281.0444 m/z

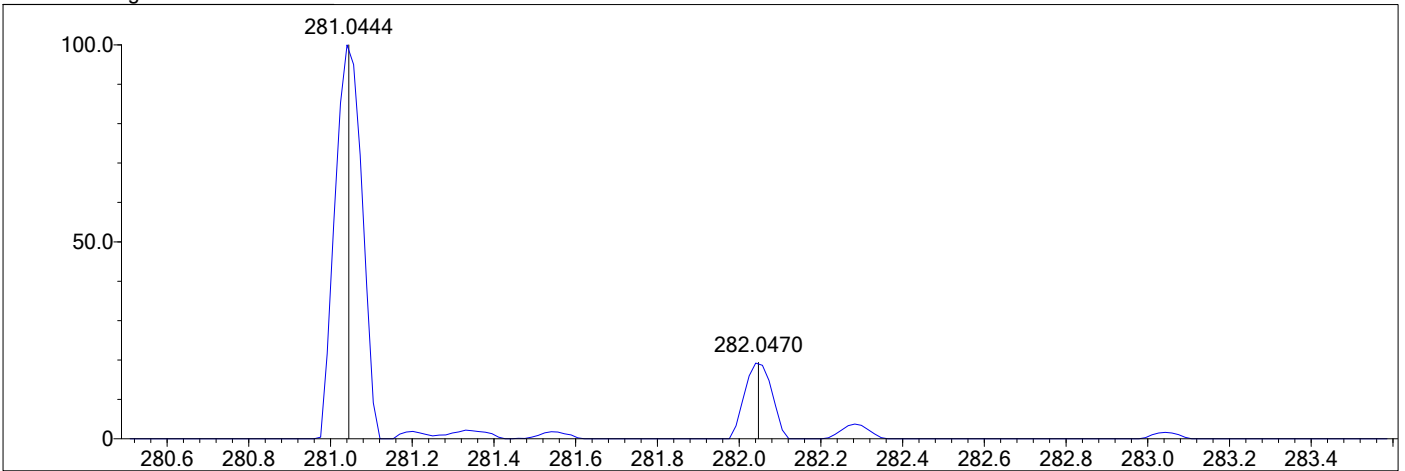

C16 H8 O5 [M+H]<sup>+</sup> : Predicted region for 281.0444 m/z

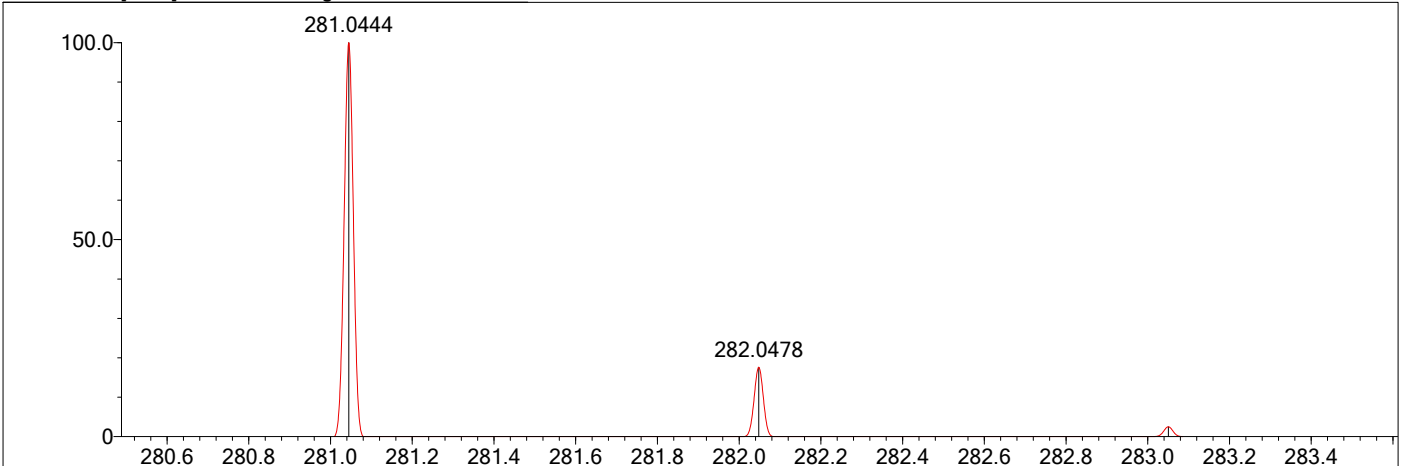

| Rank | Score | Formula (M) | Ion                | Meas. m/z | Pred. m/z | Df. (mDa) | Df. (ppm) | Iso   | DBE  |
|------|-------|-------------|--------------------|-----------|-----------|-----------|-----------|-------|------|
| 1    | 73.27 | C16 H8 O5   | [M+H] <sup>+</sup> | 281.0444  | 281.0444  | -0.0      | 0.00      | 73.27 | 13.0 |

Data File: F:\高分辨数据\Zouyong\sjf\S6.lcd

| Elmt | Val. | Min | Max | Use Adduct |
|------|------|-----|-----|------|------|-----|-----|------|------|-----|-----|------|------|-----|-----|------------|
| H    | 1    | 0   | 80  | O    | 2    | 0   | 20  | P    | 3    | 0   | 0   | Zn   | 2    | 0   | 0   | H          |
| 2H   | 1    | 0   | 0   | 18O  | 2    | 0   | 0   | S    | 2    | 0   | 0   | Se   | 2    | 0   | 0   |            |
| B    | 3    | 0   | 0   | F    | 1    | 0   | 0   | Cl   | 1    | 0   | 0   | Br   | 1    | 0   | 0   |            |
| C    | 4    | 0   | 60  | Na   | 1    | 0   | 0   | K    | 1    | 0   | 0   |      |      |     |     |            |
| N    | 3    | 0   | 0   | Si   | 4    | 0   | 0   | Mn   | 3    | 0   | 0   |      |      |     |     |            |
|      |      |     |     |      |      |     |     |      |      |     |     |      |      |     |     |            |

Error Margin (ppm): 100  
 HC Ratio: unlimited  
 Max Isotopes: all  
 MSn Iso RI (%): 75.00

DBE Range: -2.0 - 1000.0  
 Apply N Rule: yes  
 Isotope RI (%): 1.00  
 MSn Logic Mode: AND

Electron Ions: both  
 Use MSn Info: no  
 Isotope Res: 10000  
 Max Results: 500

1g

Event#: 1 MS(E+) Ret. Time : 1.120 Scan# : 169

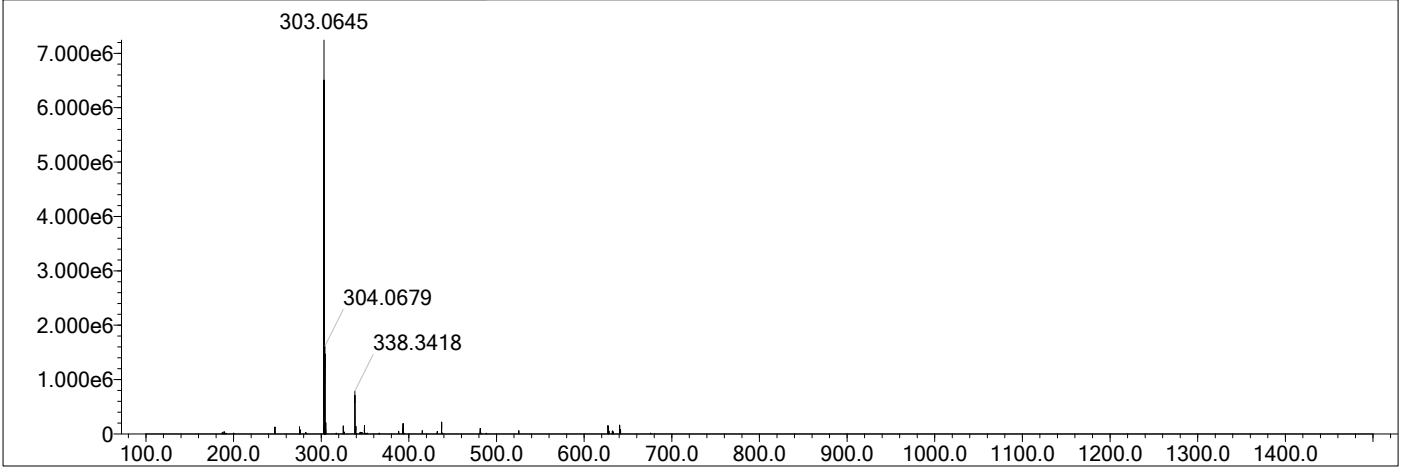

Measured region for 303.0645 m/z

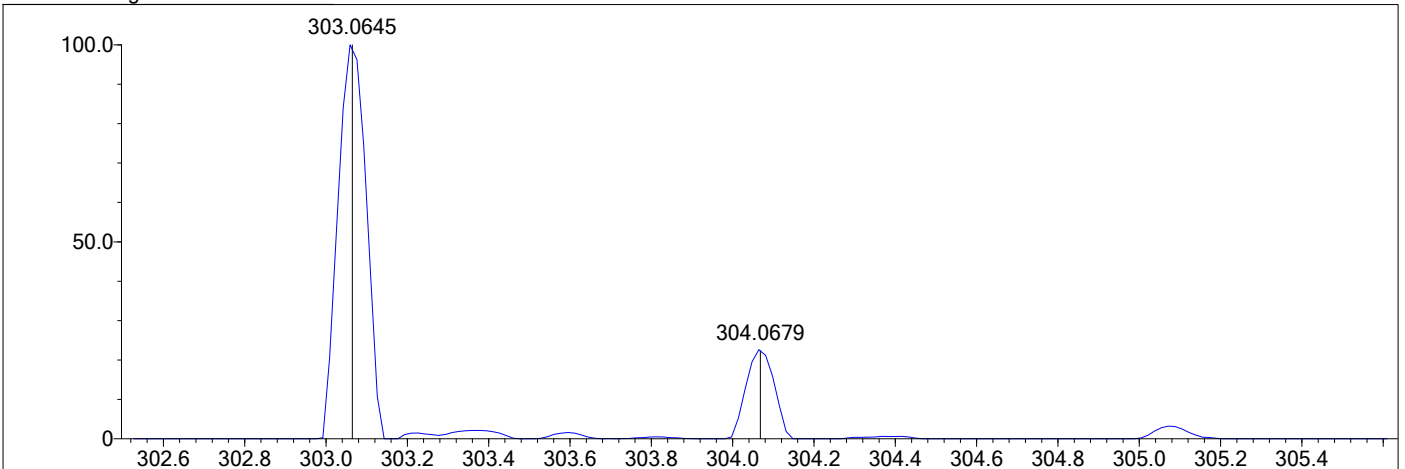

C19 H10 O4 [M+H]<sup>+</sup> : Predicted region for 303.0652 m/z

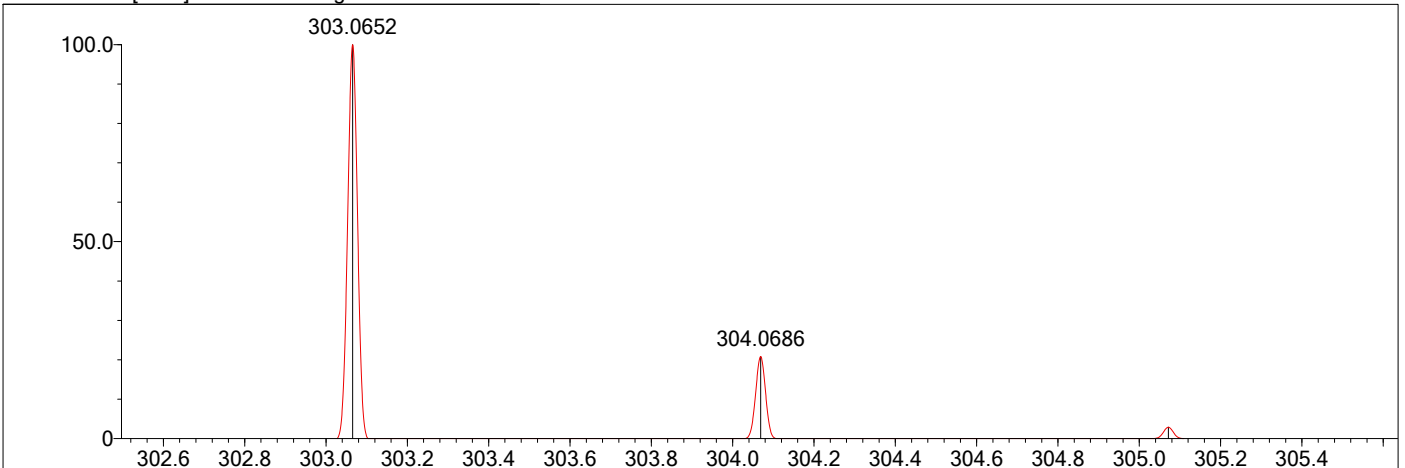

| Rank | Score | Formula (M) | Ion                | Meas. m/z | Pred. m/z | Df. (mDa) | Df. (ppm) | Iso   | DBE  |
|------|-------|-------------|--------------------|-----------|-----------|-----------|-----------|-------|------|
| 1    | 79.30 | C19 H10 O4  | [M+H] <sup>+</sup> | 303.0645  | 303.0652  | -0.7      | -2.31     | 81.98 | 15.0 |

Data File: F:\高分辨数据\Zouyong\sjf\S7.lcd

| Elmt | Val. | Min | Max | Use Adduct |
|------|------|-----|-----|------|------|-----|-----|------|------|-----|-----|------|------|-----|-----|------------|
| H    | 1    | 0   | 80  | O    | 2    | 0   | 20  | P    | 3    | 0   | 0   | Zn   | 2    | 0   | 0   | H          |
| 2H   | 1    | 0   | 0   | 18O  | 2    | 0   | 0   | S    | 2    | 0   | 0   | Se   | 2    | 0   | 0   |            |
| B    | 3    | 0   | 0   | F    | 1    | 0   | 0   | Cl   | 1    | 0   | 0   | Br   | 1    | 0   | 0   |            |
| C    | 4    | 0   | 60  | Na   | 1    | 0   | 0   | K    | 1    | 0   | 0   |      |      |     |     |            |
| N    | 3    | 0   | 0   | Si   | 4    | 0   | 0   | Mn   | 3    | 0   | 0   |      |      |     |     |            |
|      |      |     |     |      |      |     |     |      |      |     |     |      |      |     |     |            |

Error Margin (ppm): 100  
 HC Ratio: unlimited  
 Max Isotopes: all  
 MSn Iso RI (%): 75.00

DBE Range: -2.0 - 1000.0  
 Apply N Rule: yes  
 Isotope RI (%): 1.00  
 MSn Logic Mode: AND

Electron Ions: both  
 Use MSn Info: no  
 Isotope Res: 10000  
 Max Results: 500

1h

Event#: 1 MS(E+) Ret. Time : 1.213 Scan# : 183

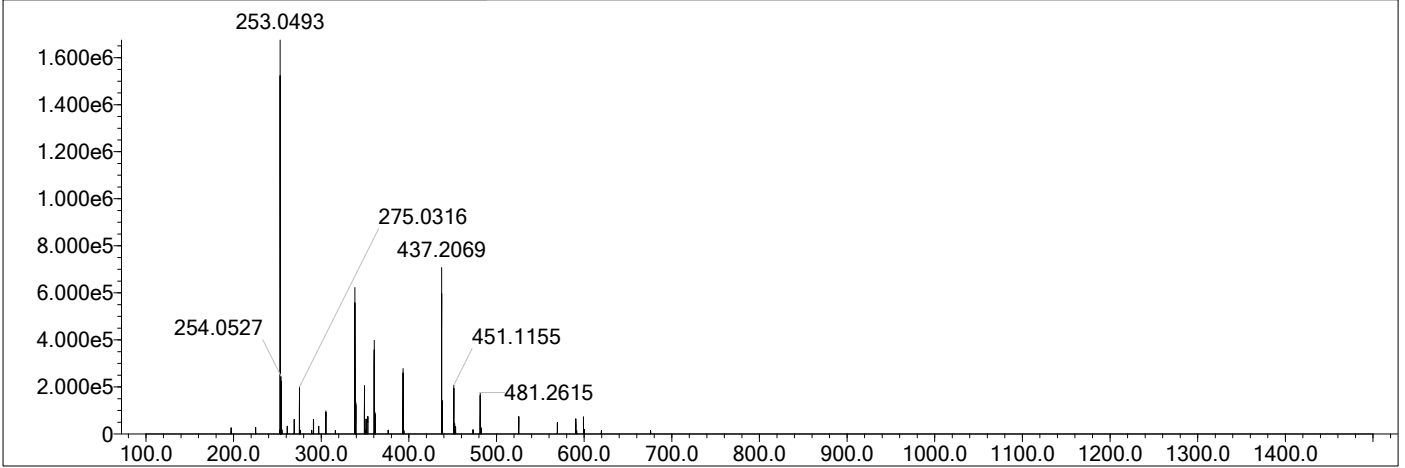

Measured region for 253.0493 m/z

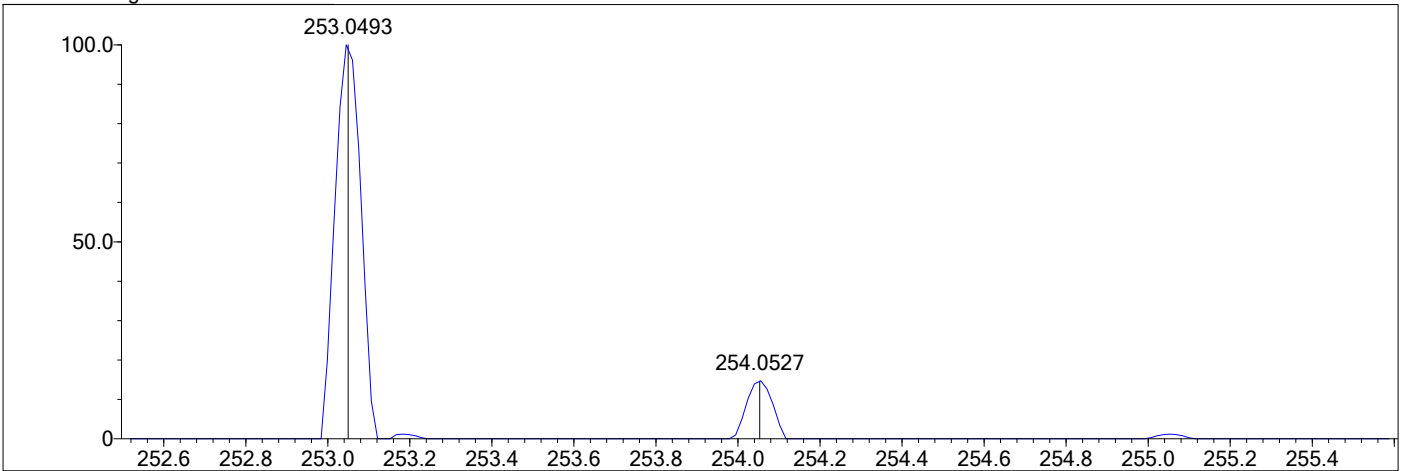

C15 H8 O4 [M+H]+ : Predicted region for 253.0495 m/z

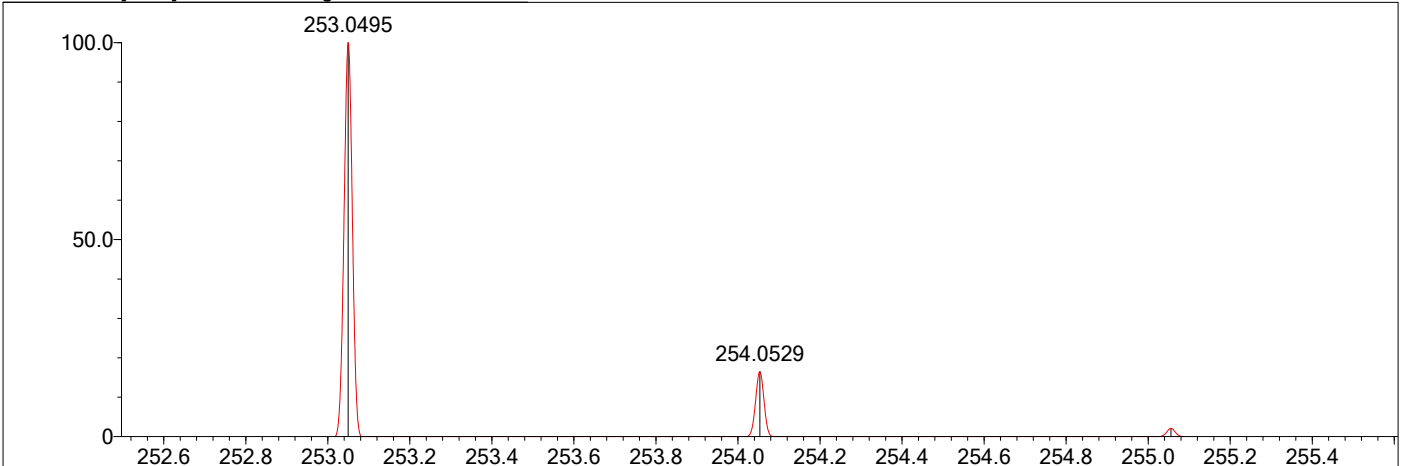

| Rank | Score | Formula (M) | Ion    | Meas. m/z | Pred. m/z | Df. (mDa) | Df. (ppm) | Iso   | DBE  |
|------|-------|-------------|--------|-----------|-----------|-----------|-----------|-------|------|
| 1    | 77.50 | C15 H8 O4   | [M+H]+ | 253.0493  | 253.0495  | -0.2      | -0.79     | 77.50 | 12.0 |



Data File: F:\高分辨数据\Zouyong\sjf\S8.lcd

| Elmt | Val. | Min | Max | Use Adduct |
|------|------|-----|-----|------|------|-----|-----|------|------|-----|-----|------|------|-----|-----|------------|
| H    | 1    | 0   | 80  | O    | 2    | 0   | 20  | P    | 3    | 0   | 0   | Zn   | 2    | 0   | 0   | H          |
| 2H   | 1    | 0   | 0   | 18O  | 2    | 0   | 0   | S    | 2    | 0   | 0   | Se   | 2    | 0   | 0   |            |
| B    | 3    | 0   | 0   | F    | 1    | 0   | 0   | Cl   | 1    | 0   | 0   | Br   | 1    | 0   | 0   |            |
| C    | 4    | 0   | 60  | Na   | 1    | 0   | 0   | K    | 1    | 0   | 0   |      |      |     |     |            |
| N    | 3    | 0   | 0   | Si   | 4    | 0   | 0   | Mn   | 3    | 0   | 0   |      |      |     |     |            |
|      |      |     |     |      |      |     |     |      |      |     |     |      |      |     |     |            |

Error Margin (ppm): 100  
 HC Ratio: unlimited  
 Max Isotopes: all  
 MSn Iso RI (%): 75.00

DBE Range: -2.0 - 1000.0  
 Apply N Rule: yes  
 Isotope RI (%): 1.00  
 MSn Logic Mode: AND

Electron Ions: both  
 Use MSn Info: no  
 Isotope Res: 10000  
 Max Results: 500

1i

Event#: 1 MS(E+) Ret. Time : 1.227 Scan# : 185

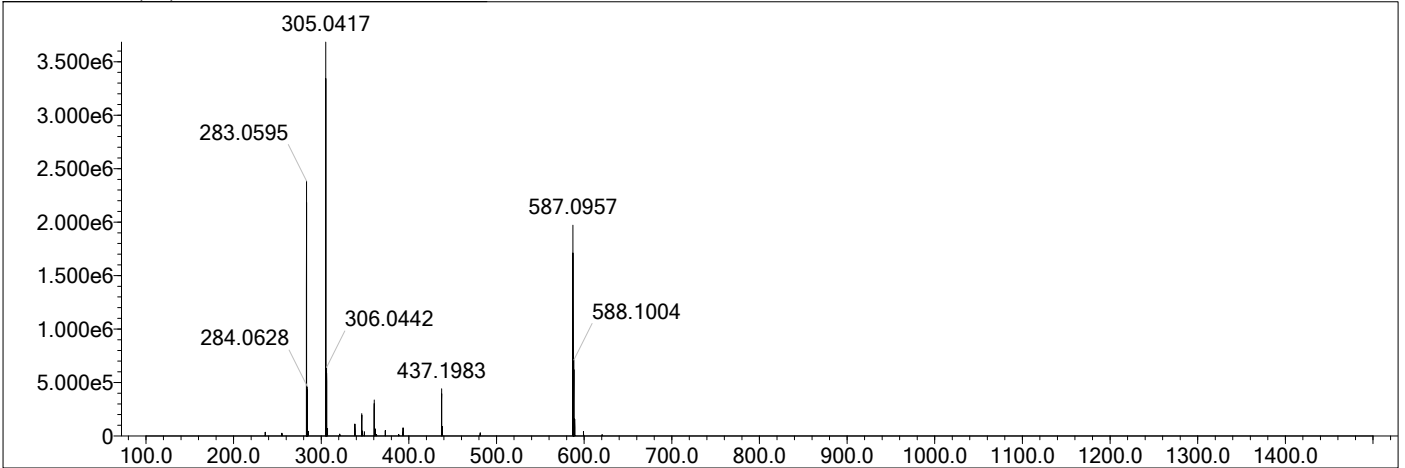

Measured region for 283.0595 m/z

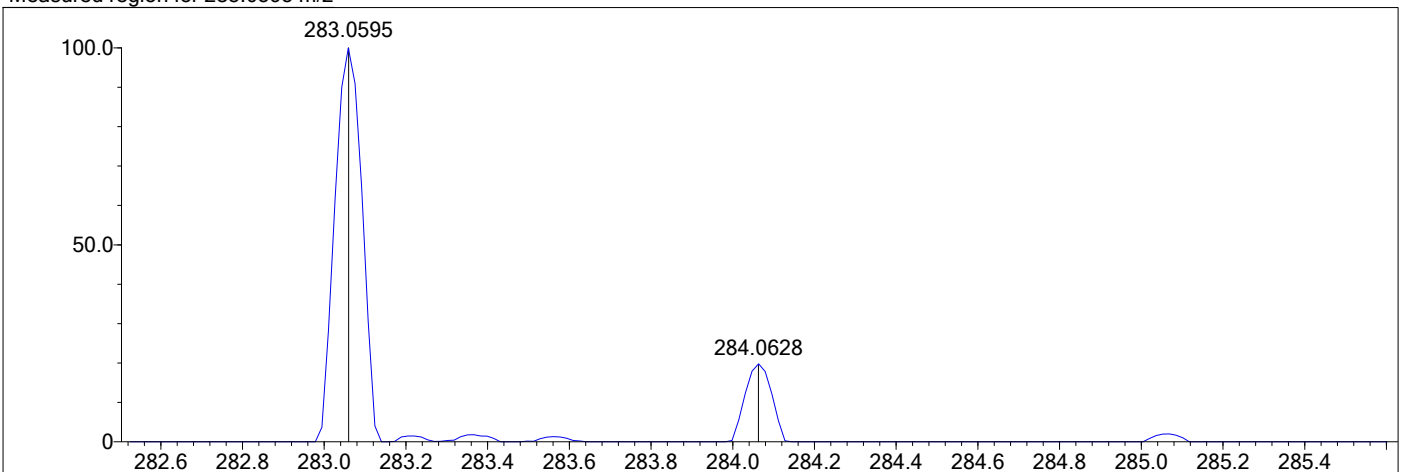

C16 H10 O5 [M+H]<sup>+</sup> : Predicted region for 283.0601 m/z

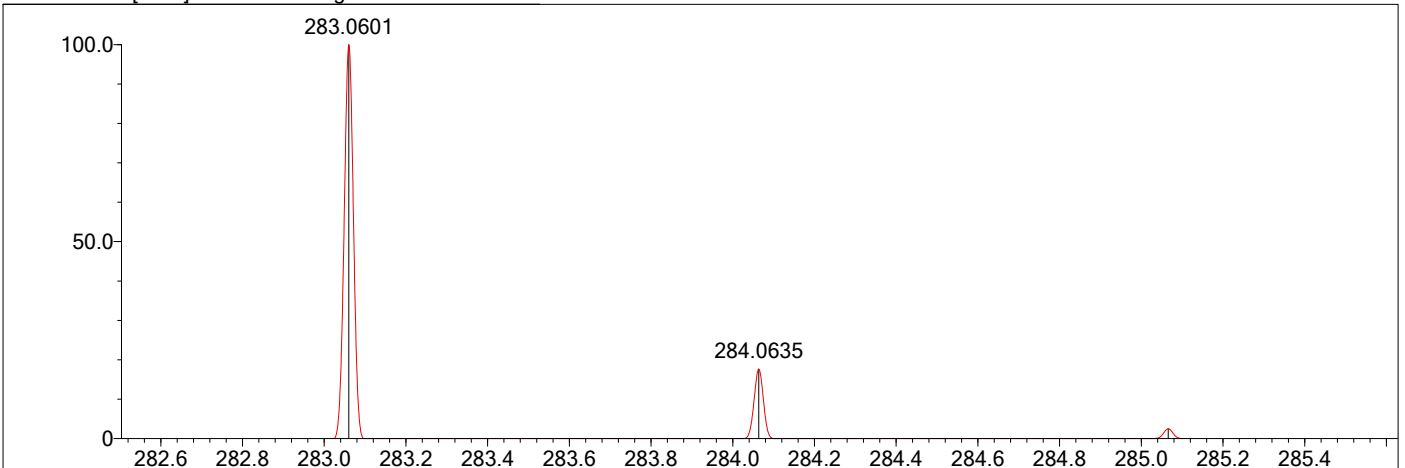

| Rank | Score | Formula (M) | Ion                | Meas. m/z | Pred. m/z | Df. (mDa) | Df. (ppm) | Iso   | DBE  |
|------|-------|-------------|--------------------|-----------|-----------|-----------|-----------|-------|------|
| 1    | 78.97 | C16 H10 O5  | [M+H] <sup>+</sup> | 283.0595  | 283.0601  | -0.6      | -2.12     | 81.24 | 12.0 |

Data File: F:\高分辨数据\Zouyong\sjf\S9.lcd

| Elmt | Val. | Min | Max | Use Adduct |
|------|------|-----|-----|------|------|-----|-----|------|------|-----|-----|------|------|-----|-----|------------|
| H    | 1    | 0   | 80  | O    | 2    | 0   | 20  | P    | 3    | 0   | 0   | Zn   | 2    | 0   | 0   | H          |
| 2H   | 1    | 0   | 0   | 18O  | 2    | 0   | 0   | S    | 2    | 0   | 0   | Se   | 2    | 0   | 0   |            |
| B    | 3    | 0   | 0   | F    | 1    | 0   | 0   | Cl   | 1    | 0   | 0   | Br   | 1    | 0   | 0   |            |
| C    | 4    | 0   | 60  | Na   | 1    | 0   | 0   | K    | 1    | 0   | 0   |      |      |     |     |            |
| N    | 3    | 0   | 0   | Si   | 4    | 0   | 0   | Mn   | 3    | 0   | 0   |      |      |     |     |            |
|      |      |     |     |      |      |     |     |      |      |     |     |      |      |     |     |            |

Error Margin (ppm): 100  
 HC Ratio: unlimited  
 Max Isotopes: all  
 MSn Iso RI (%): 75.00

DBE Range: -2.0 - 1000.0  
 Apply N Rule: yes  
 Isotope RI (%): 1.00  
 MSn Logic Mode: AND

Electron Ions: both  
 Use MSn Info: no  
 Isotope Res: 10000  
 Max Results: 500

1j

Event#: 1 MS(E+) Ret. Time : 1.133 Scan# : 171

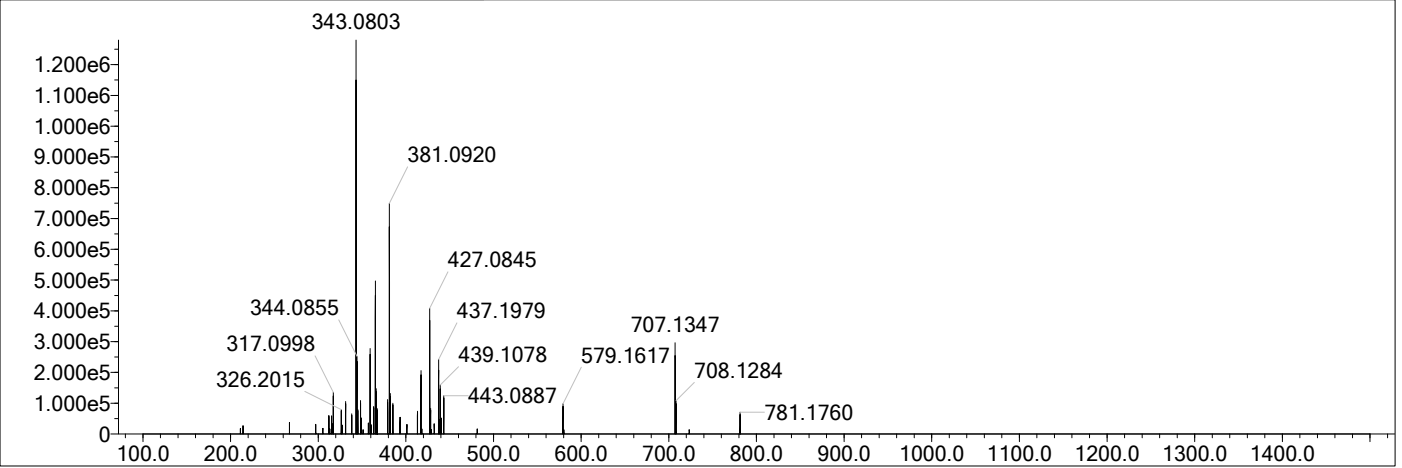

Measured region for 343.0803 m/z

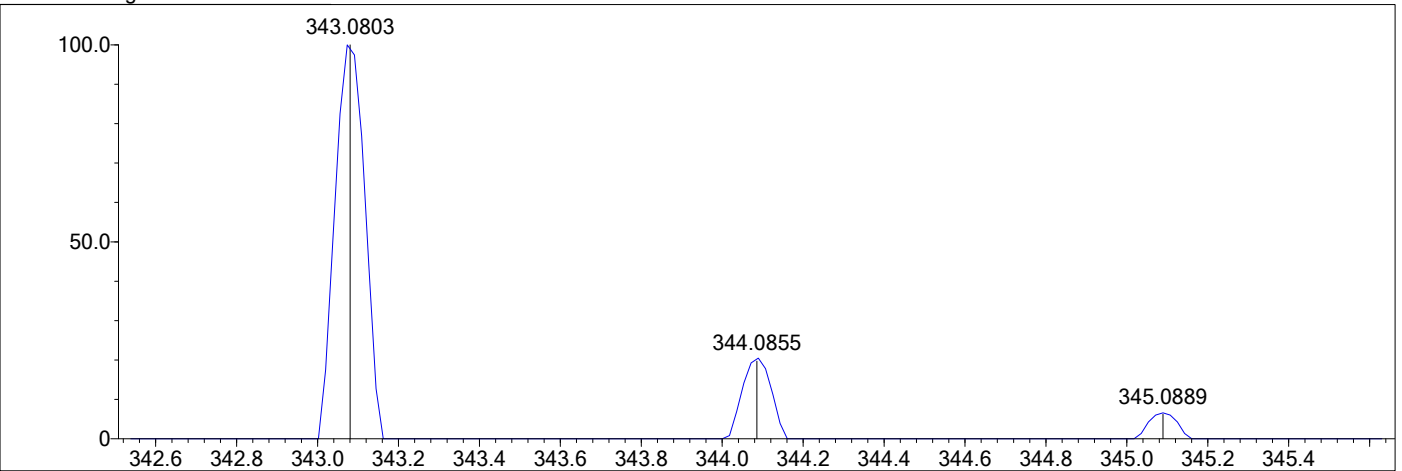

C18 H14 O7 [M+H]<sup>+</sup> : Predicted region for 343.0812 m/z

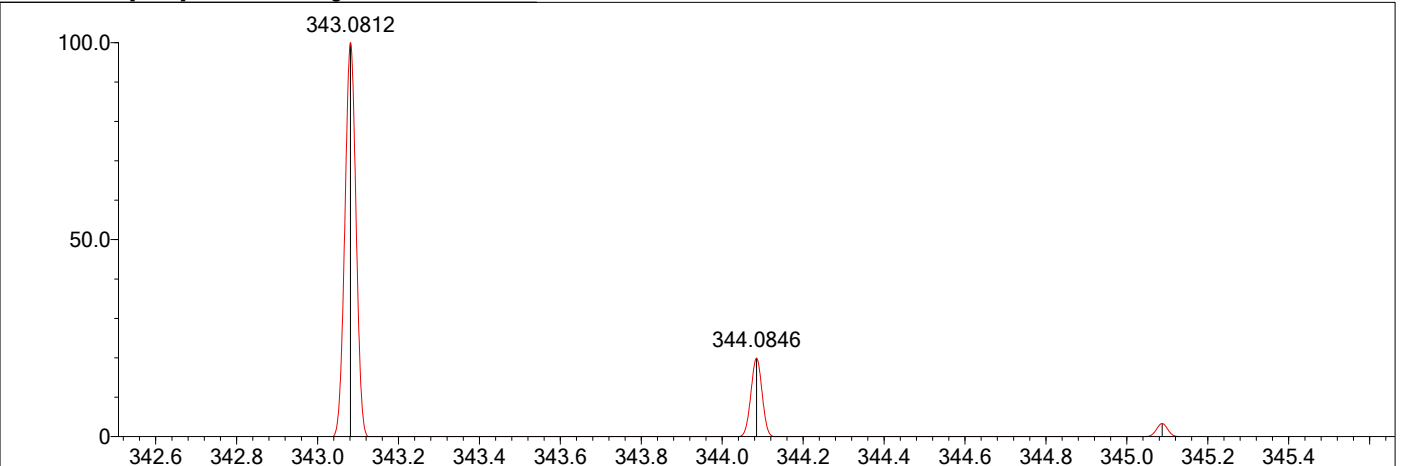

| Rank | Score | Formula (M) | Ion                | Meas. m/z | Pred. m/z | Df. (mDa) | Df. (ppm) | Iso   | DBE  |
|------|-------|-------------|--------------------|-----------|-----------|-----------|-----------|-------|------|
| 1    | 71.06 | C18 H14 O7  | [M+H] <sup>+</sup> | 343.0803  | 343.0812  | -0.9      | -2.62     | 74.06 | 12.0 |

Data File: \\Deep-20160624\data1\邹永\SXH\SJF-1K.Icd

| Elmt | Val. | Min | Max | Use Adduct |
|------|------|-----|-----|------|------|-----|-----|------|------|-----|-----|------|------|-----|-----|------------|
| H    | 1    | 6   | 10  | O    | 2    | 2   | 3   | K    | 1    | 0   | 0   | Pd   | 2    | 0   | 0   | H          |
| 2H   | 1    | 0   | 0   | F    | 1    | 0   | 0   | Mn   | 3    | 0   | 0   | I    | 3    | 0   | 0   | Na         |
| 3H   | 1    | 0   | 0   | Si   | 4    | 0   | 0   | Fe   | 2    | 0   | 0   | Pt   | 2    | 0   | 0   |            |
| B    | 3    | 0   | 0   | P    | 3    | 0   | 0   | Cu   | 2    | 0   | 0   | Au   | 1    | 0   | 0   |            |
| C    | 4    | 14  | 16  | S    | 2    | 0   | 0   | Se   | 2    | 0   | 0   |      |      |     |     |            |
| N    | 3    | 0   | 0   | Cl   | 1    | 0   | 0   | Br   | 1    | 0   | 0   |      |      |     |     |            |

Error Margin (ppm): 100  
 HC Ratio: 0.0 - 100.0  
 Max Isotopes: all  
 MSn Iso RI (%): 75.00

DBE Range: -100.0 - 200.0  
 Apply N Rule: yes  
 Isotope RI (%): 1.00  
 MSn Logic Mode: AND

Electron Ions: both  
 Use MSn Info: no  
 Isotope Res: 10000  
 Max Results: 100

1k

Event#: 1 MS(E+) Ret. Time : 1.320 -> 1.320 Scan# : 199 -> 199

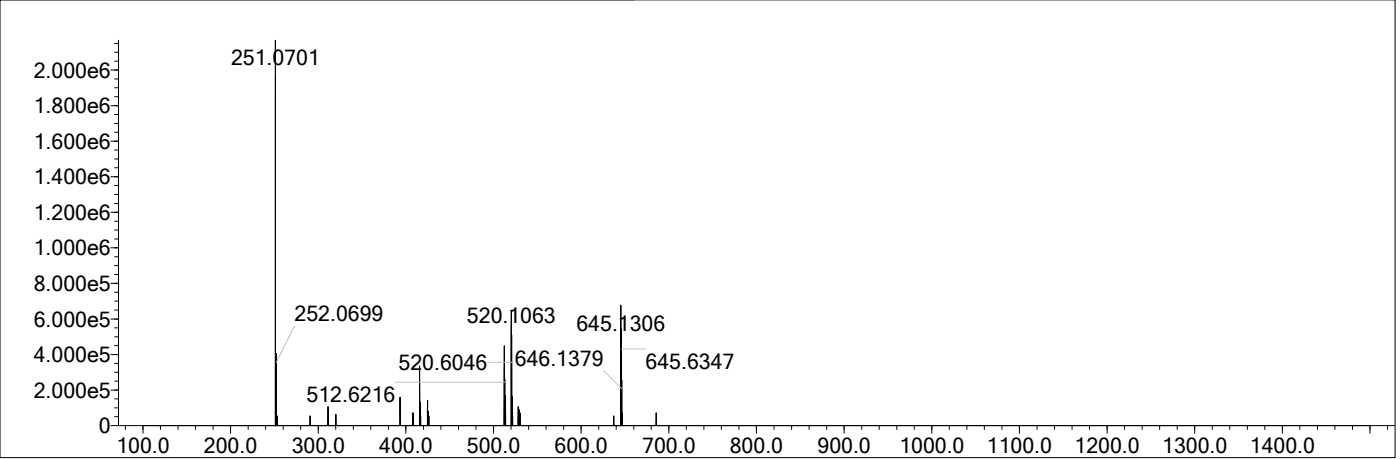

Measured region for 251.0701 m/z

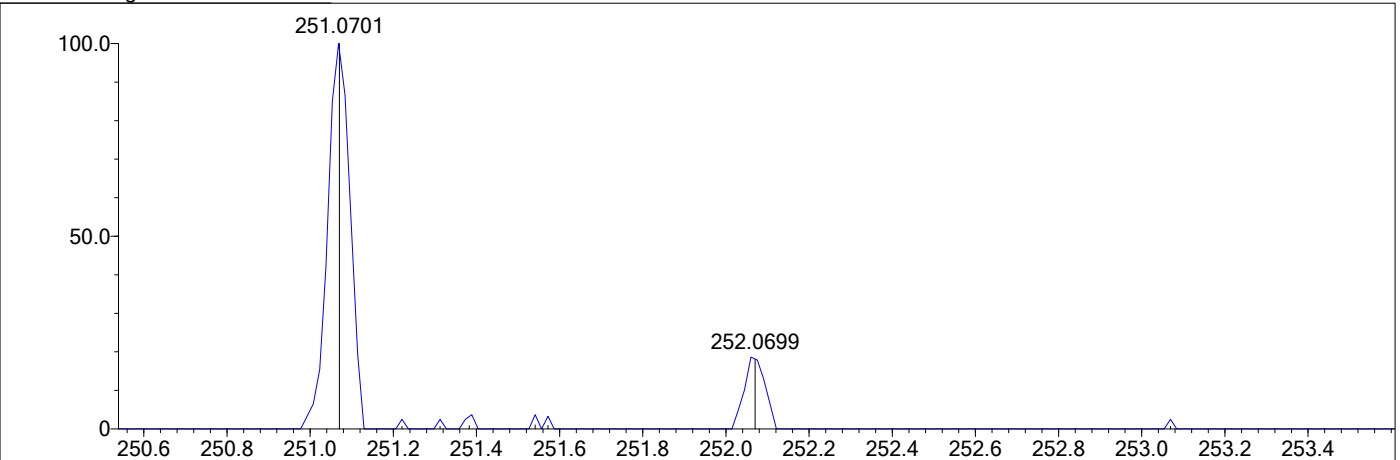

C16 H10 O3 [M+H]+ : Predicted region for 251.0703 m/z

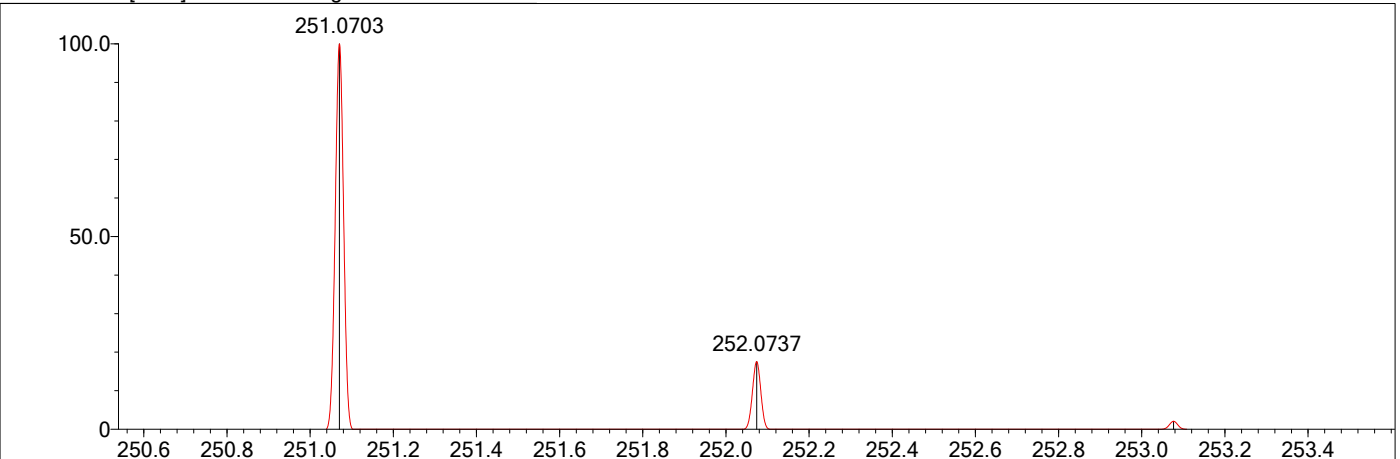

| Rank | Score | Formula (M) | Ion    | Meas. m/z | Pred. m/z | Df. (mDa) | Df. (ppm) | Iso   | DBE  |
|------|-------|-------------|--------|-----------|-----------|-----------|-----------|-------|------|
| 1    | 69.28 | C16 H10 O3  | [M+H]+ | 251.0701  | 251.0703  | -0.2      | -0.80     | 69.28 | 12.0 |

Data File: F:\高分辨数据\Zouyong\sjf\S10.lcd

| Elmt | Val. | Min | Max | Use Adduct |
|------|------|-----|-----|------|------|-----|-----|------|------|-----|-----|------|------|-----|-----|------------|
| H    | 1    | 0   | 80  | O    | 2    | 0   | 20  | P    | 3    | 0   | 0   | Zn   | 2    | 0   | 0   | H          |
| 2H   | 1    | 0   | 0   | 18O  | 2    | 0   | 0   | S    | 2    | 0   | 0   | Se   | 2    | 0   | 0   |            |
| B    | 3    | 0   | 0   | F    | 1    | 0   | 0   | Cl   | 1    | 0   | 0   | Br   | 1    | 0   | 0   |            |
| C    | 4    | 0   | 60  | Na   | 1    | 0   | 0   | K    | 1    | 0   | 0   |      |      |     |     |            |
| N    | 3    | 0   | 0   | Si   | 4    | 0   | 0   | Mn   | 3    | 0   | 0   |      |      |     |     |            |
|      |      |     |     |      |      |     |     |      |      |     |     |      |      |     |     |            |

Error Margin (ppm): 100  
 HC Ratio: unlimited  
 Max Isotopes: all  
 MSn Iso RI (%): 75.00

DBE Range: -2.0 - 1000.0  
 Apply N Rule: yes  
 Isotope RI (%): 1.00  
 MSn Logic Mode: AND

Electron Ions: both  
 Use MSn Info: no  
 Isotope Res: 10000  
 Max Results: 500

11

Event#: 1 MS(E+) Ret. Time : 1.560 Scan# : 235

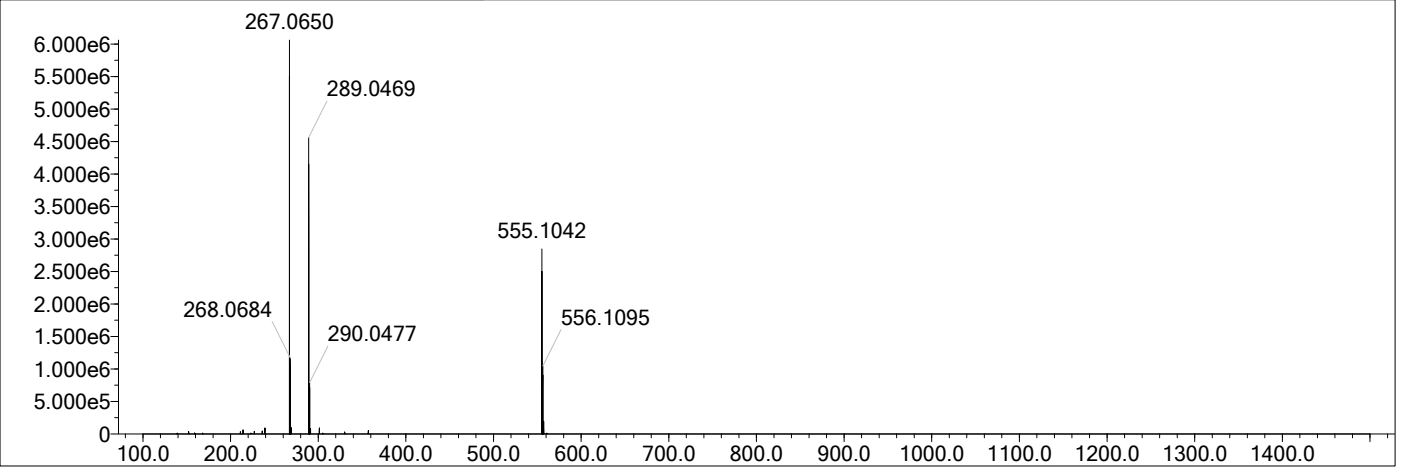

Measured region for 267.0650 m/z

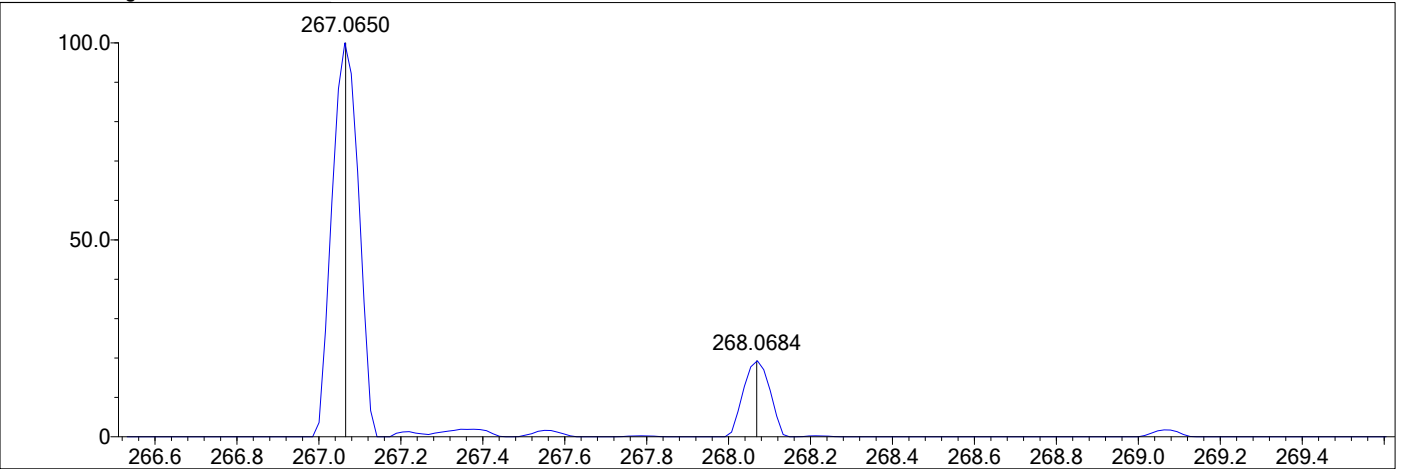

C16 H10 O4 [M+H]<sup>+</sup> : Predicted region for 267.0652 m/z

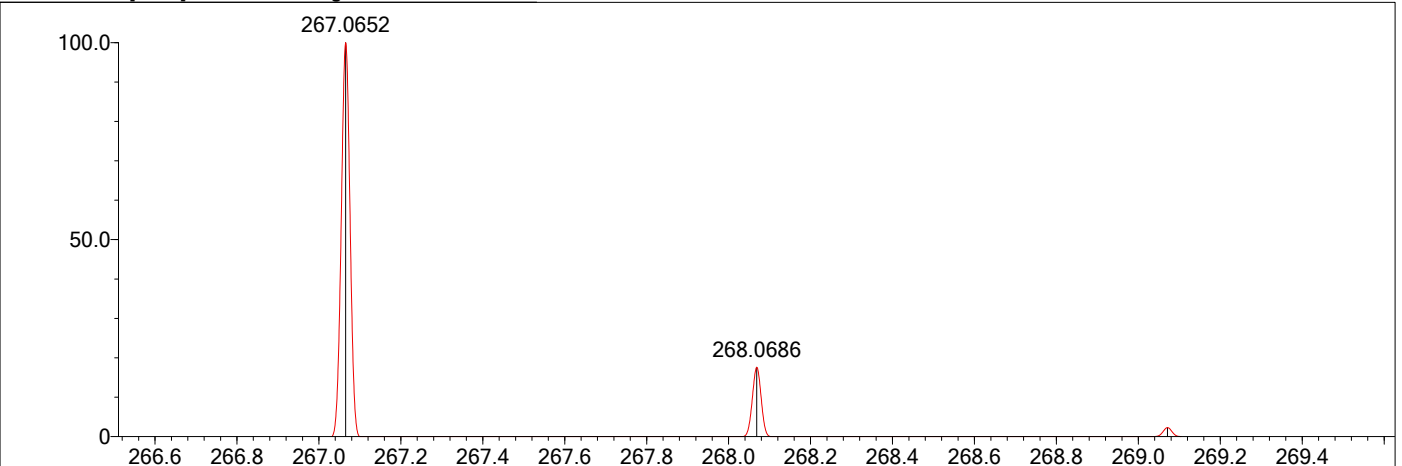

| Rank | Score | Formula (M) | Ion                | Meas. m/z | Pred. m/z | Df. (mDa) | Df. (ppm) | Iso   | DBE  |
|------|-------|-------------|--------------------|-----------|-----------|-----------|-----------|-------|------|
| 1    | 73.11 | C16 H10 O4  | [M+H] <sup>+</sup> | 267.0650  | 267.0652  | -0.2      | -0.75     | 73.11 | 12.0 |

Data File: F:\高分辨数据\Zouyong\sjf\S15.lcd

| Elmt | Val. | Min | Max | Use Adduct |
|------|------|-----|-----|------|------|-----|-----|------|------|-----|-----|------|------|-----|-----|------------|
| H    | 1    | 0   | 80  | O    | 2    | 0   | 20  | P    | 3    | 0   | 0   | Zn   | 2    | 0   | 0   | H          |
| 2H   | 1    | 0   | 0   | 18O  | 2    | 0   | 0   | S    | 2    | 0   | 0   | Se   | 2    | 0   | 0   |            |
| B    | 3    | 0   | 0   | F    | 1    | 0   | 0   | Cl   | 1    | 1   | 1   | Br   | 1    | 0   | 0   |            |
| C    | 4    | 0   | 60  | Na   | 1    | 0   | 0   | K    | 1    | 0   | 0   |      |      |     |     |            |
| N    | 3    | 0   | 0   | Si   | 4    | 0   | 0   | Mn   | 3    | 0   | 0   |      |      |     |     |            |

Error Margin (ppm): 100  
 HC Ratio: unlimited  
 Max Isotopes: all  
 MSn Iso RI (%): 75.00

DBE Range: -2.0 - 1000.0  
 Apply N Rule: yes  
 Isotope RI (%): 1.00  
 MSn Logic Mode: AND

Electron Ions: both  
 Use MSn Info: no  
 Isotope Res: 10000  
 Max Results: 500

1m

Event#: 1 MS(E+) Ret. Time : 1.680 Scan# : 253

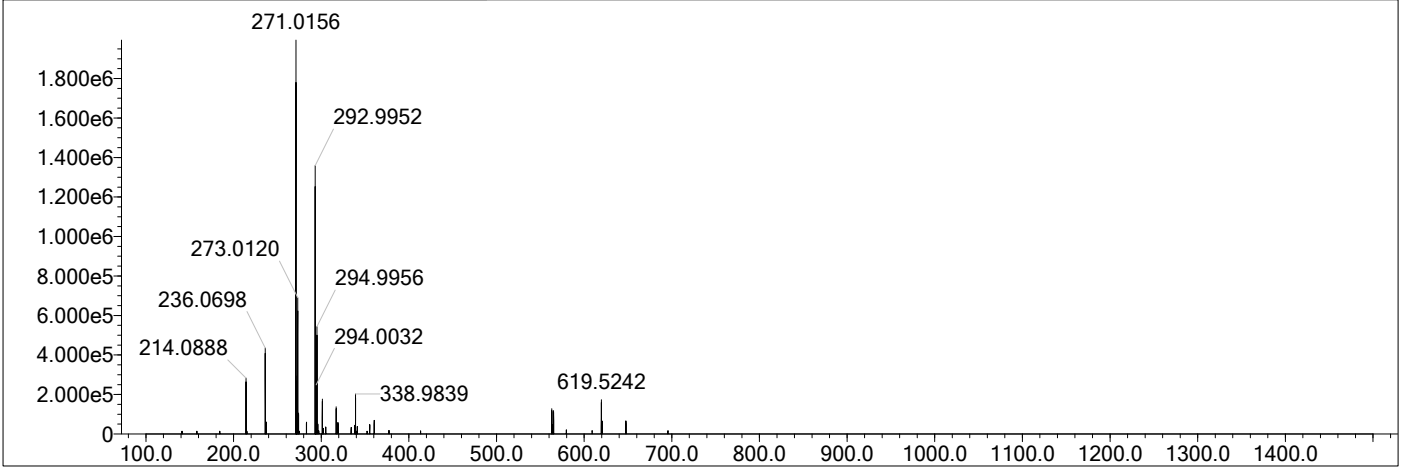

Measured region for 271.0156 m/z

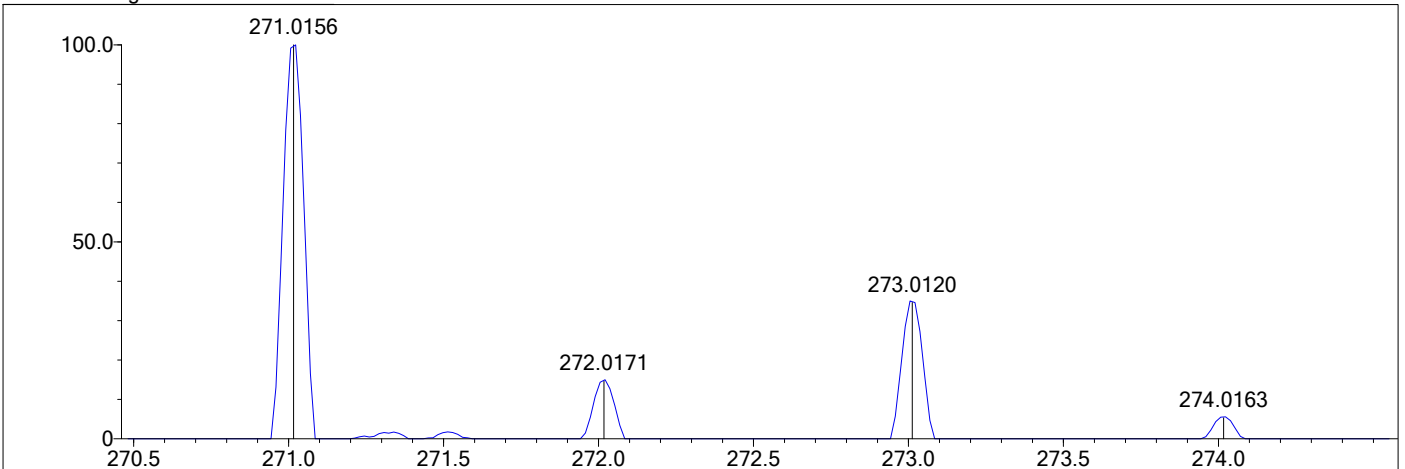

C15 H7 O3 Cl [M+H]+ : Predicted region for 271.0156 m/z

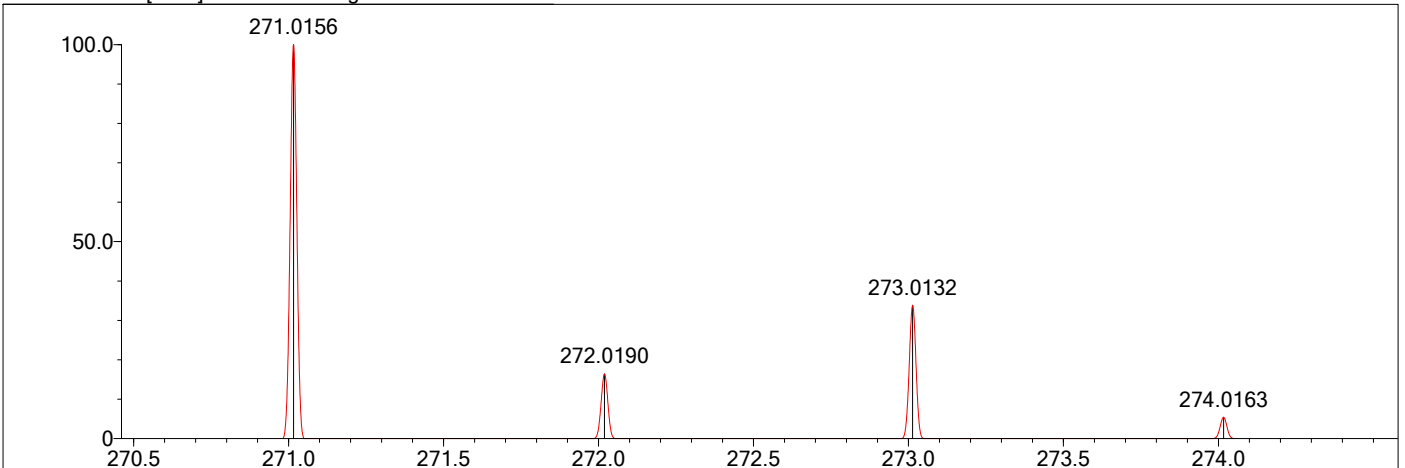

| Rank | Score | Formula (M)  | Ion    | Meas. m/z | Pred. m/z | Df. (mDa) | Df. (ppm) | Iso   | DBE  |
|------|-------|--------------|--------|-----------|-----------|-----------|-----------|-------|------|
| 1    | 78.35 | C15 H7 O3 Cl | [M+H]+ | 271.0156  | 271.0156  | -0.0      | 0.00      | 78.35 | 12.0 |

Data File: F:\高分辨数据\Zouyong\sjf\S11.lcd

| Elmt | Val. | Min | Max | Use Adduct |
|------|------|-----|-----|------|------|-----|-----|------|------|-----|-----|------|------|-----|-----|------------|
| H    | 1    | 0   | 80  | O    | 2    | 0   | 20  | P    | 3    | 0   | 0   | Zn   | 2    | 0   | 0   | H          |
| 2H   | 1    | 0   | 0   | 18O  | 2    | 0   | 0   | S    | 2    | 0   | 0   | Se   | 2    | 0   | 0   |            |
| B    | 3    | 0   | 0   | F    | 1    | 0   | 0   | Cl   | 1    | 0   | 0   | Br   | 1    | 0   | 0   |            |
| C    | 4    | 0   | 60  | Na   | 1    | 0   | 0   | K    | 1    | 0   | 0   |      |      |     |     |            |
| N    | 3    | 0   | 0   | Si   | 4    | 0   | 0   | Mn   | 3    | 0   | 0   |      |      |     |     |            |
|      |      |     |     |      |      |     |     |      |      |     |     |      |      |     |     |            |

Error Margin (ppm): 100  
 HC Ratio: unlimited  
 Max Isotopes: all  
 MSn Iso RI (%): 75.00

DBE Range: -2.0 - 1000.0  
 Apply N Rule: yes  
 Isotope RI (%): 1.00  
 MSn Logic Mode: AND

Electron Ions: both  
 Use MSn Info: no  
 Isotope Res: 10000  
 Max Results: 500

1n

Event#: 1 MS(E+) Ret. Time : 1.360 Scan# : 205

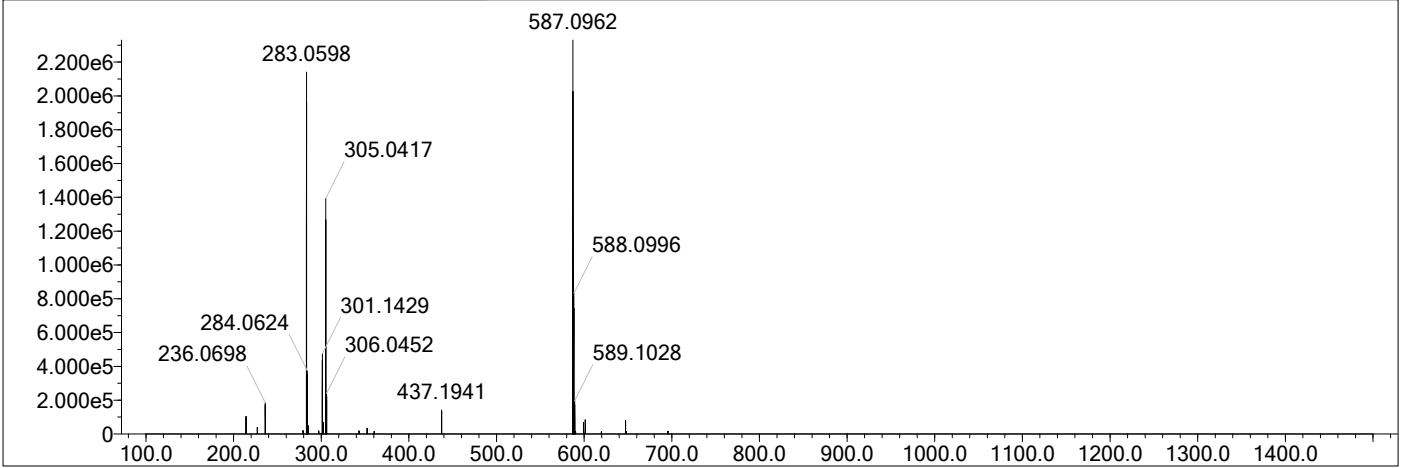

Measured region for 283.0598 m/z

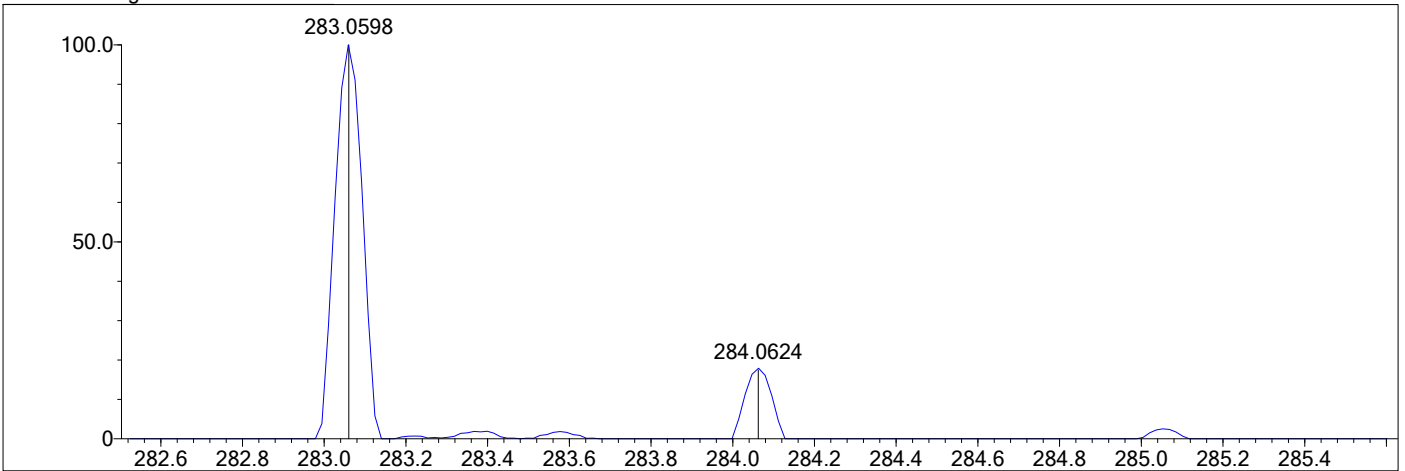

C16 H10 O5 [M+H]+ : Predicted region for 283.0601 m/z

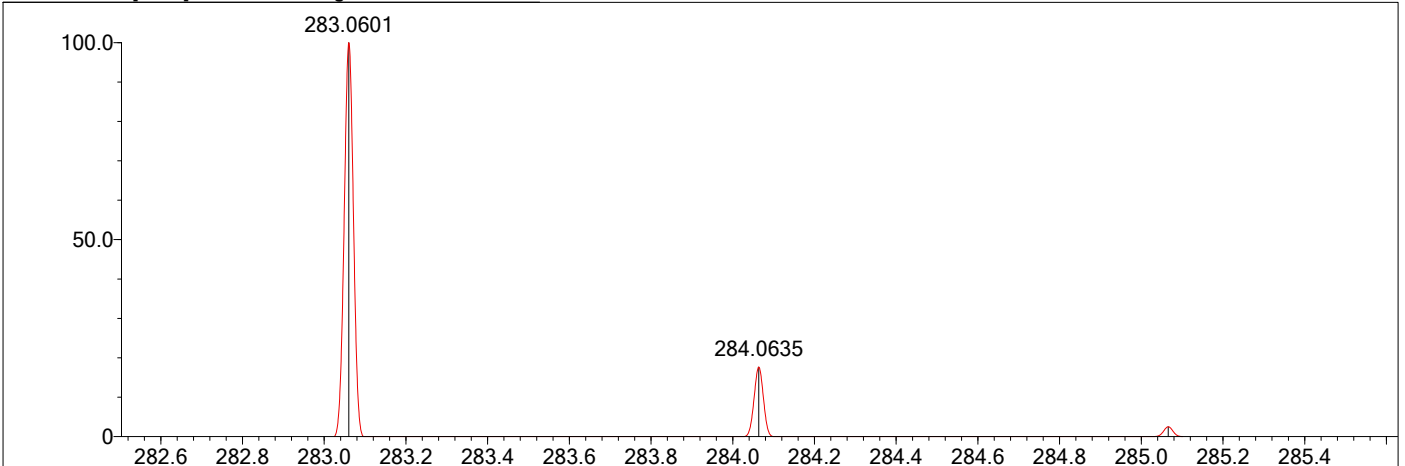

| Rank | Score | Formula (M) | Ion    | Meas. m/z | Pred. m/z | Df. (mDa) | Df. (ppm) | Iso   | DBE  |
|------|-------|-------------|--------|-----------|-----------|-----------|-----------|-------|------|
| 1    | 76.34 | C16 H10 O5  | [M+H]+ | 283.0598  | 283.0601  | -0.3      | -1.06     | 76.45 | 12.0 |

Data File: F:\高分辨数据\Zouyong\sjf\S12.lcd

| Elmt | Val. | Min | Max | Use Adduct |
|------|------|-----|-----|------|------|-----|-----|------|------|-----|-----|------|------|-----|-----|------------|
| H    | 1    | 0   | 80  | O    | 2    | 0   | 20  | P    | 3    | 0   | 0   | Zn   | 2    | 0   | 0   | H          |
| 2H   | 1    | 0   | 0   | 18O  | 2    | 0   | 0   | S    | 2    | 0   | 0   | Se   | 2    | 0   | 0   |            |
| B    | 3    | 0   | 0   | F    | 1    | 0   | 0   | Cl   | 1    | 0   | 0   | Br   | 1    | 0   | 0   |            |
| C    | 4    | 0   | 60  | Na   | 1    | 0   | 0   | K    | 1    | 0   | 0   |      |      |     |     |            |
| N    | 3    | 0   | 0   | Si   | 4    | 0   | 0   | Mn   | 3    | 0   | 0   |      |      |     |     |            |

Error Margin (ppm): 100  
 HC Ratio: unlimited  
 Max Isotopes: all  
 MSn Iso RI (%): 75.00

DBE Range: -2.0 - 1000.0  
 Apply N Rule: yes  
 Isotope RI (%): 1.00  
 MSn Logic Mode: AND

Electron Ions: both  
 Use MSn Info: no  
 Isotope Res: 10000  
 Max Results: 500

10

Event#: 1 MS(E+) Ret. Time : 1.280 Scan# : 193

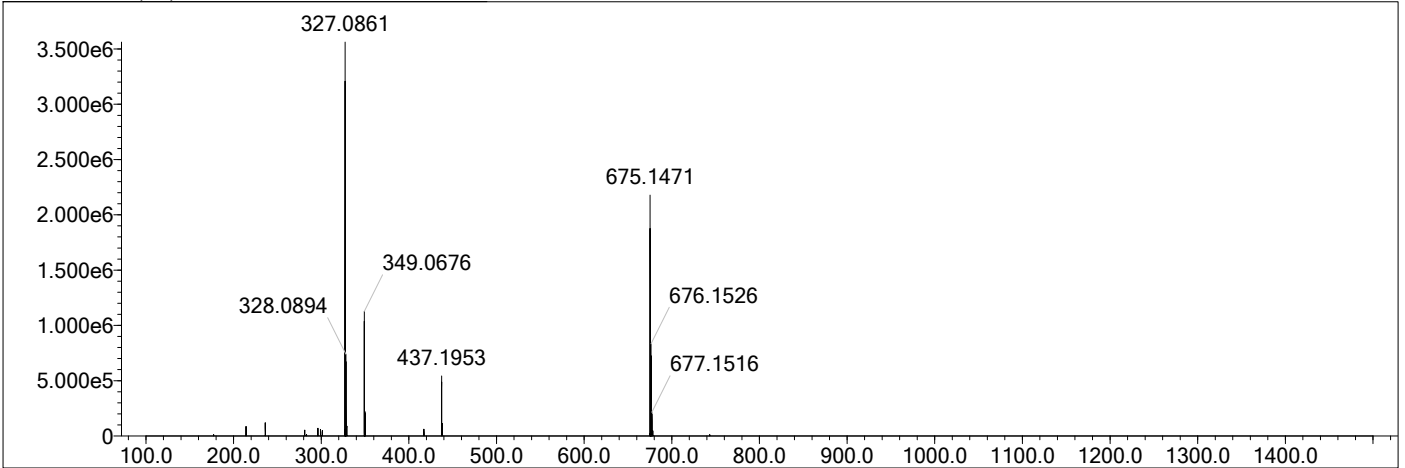

Measured region for 327.0861 m/z

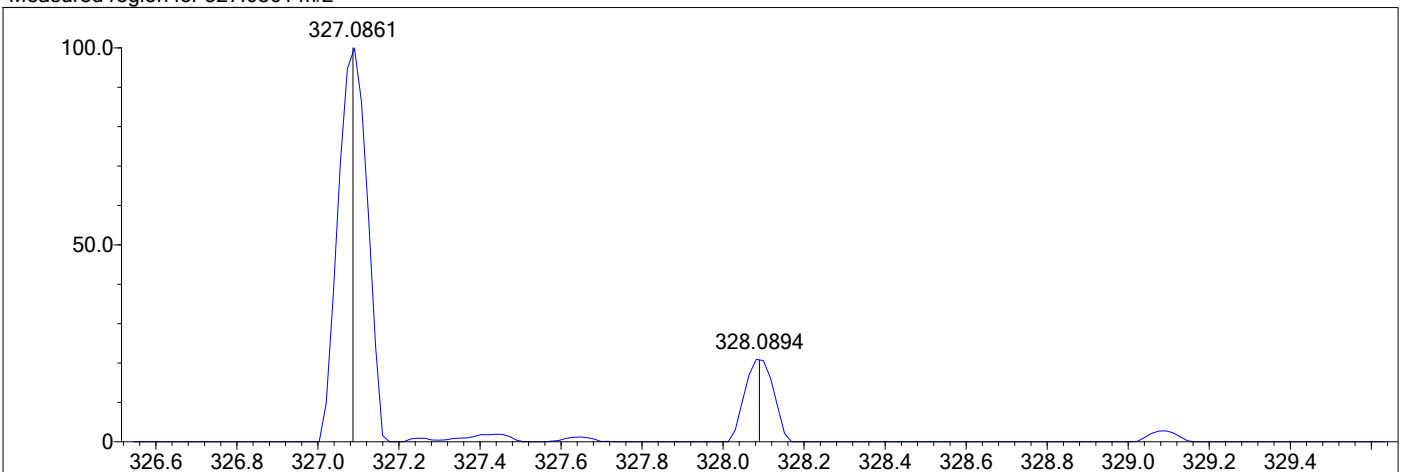

C18 H14 O6 [M+H]<sup>+</sup> : Predicted region for 327.0863 m/z

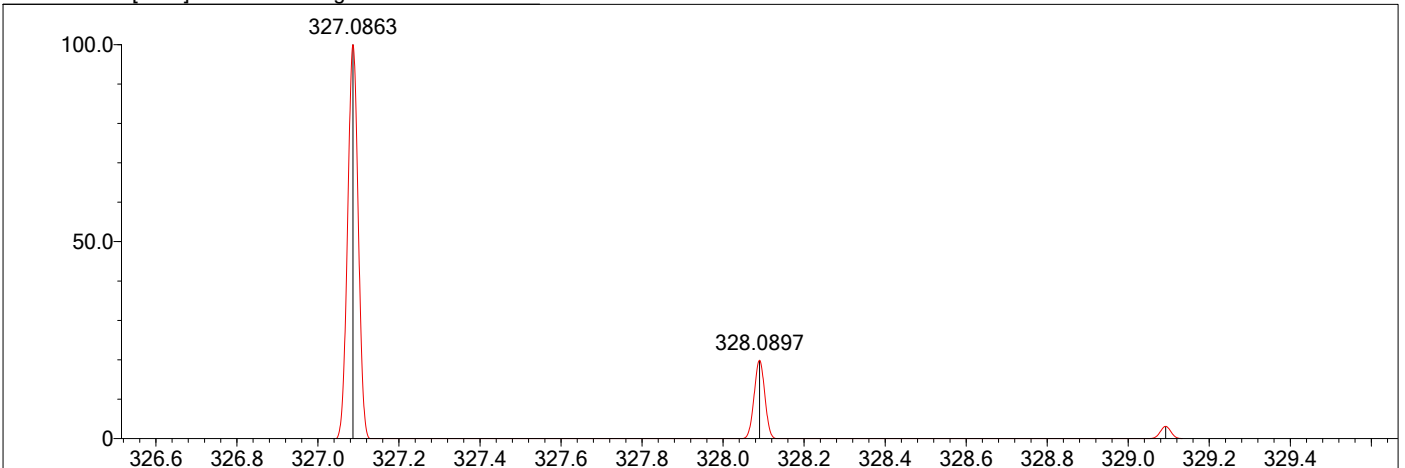

| Rank | Score | Formula (M) | Ion                | Meas. m/z | Pred. m/z | Df. (mDa) | Df. (ppm) | Iso   | DBE  |
|------|-------|-------------|--------------------|-----------|-----------|-----------|-----------|-------|------|
| 1    | 80.48 | C18 H14 O6  | [M+H] <sup>+</sup> | 327.0861  | 327.0863  | -0.2      | -0.61     | 80.48 | 12.0 |

Data File: F:\高分辨数据\Zouyong\sjf\S13.lcd

| Elmt | Val. | Min | Max | Use Adduct |
|------|------|-----|-----|------|------|-----|-----|------|------|-----|-----|------|------|-----|-----|------------|
| H    | 1    | 0   | 80  | O    | 2    | 0   | 20  | P    | 3    | 0   | 0   | Zn   | 2    | 0   | 0   | H          |
| 2H   | 1    | 0   | 0   | 18O  | 2    | 0   | 0   | S    | 2    | 0   | 0   | Se   | 2    | 0   | 0   |            |
| B    | 3    | 0   | 0   | F    | 1    | 0   | 0   | Cl   | 1    | 0   | 0   | Br   | 1    | 0   | 0   |            |
| C    | 4    | 0   | 60  | Na   | 1    | 0   | 0   | K    | 1    | 0   | 0   |      |      |     |     |            |
| N    | 3    | 0   | 0   | Si   | 4    | 0   | 0   | Mn   | 3    | 0   | 0   |      |      |     |     |            |
|      |      |     |     |      |      |     |     |      |      |     |     |      |      |     |     |            |

Error Margin (ppm): 100  
 HC Ratio: unlimited  
 Max Isotopes: all  
 MSn Iso RI (%): 75.00

DBE Range: -2.0 - 1000.0  
 Apply N Rule: yes  
 Isotope RI (%): 1.00  
 MSn Logic Mode: AND

Electron Ions: both  
 Use MSn Info: no  
 Isotope Res: 10000  
 Max Results: 500

1p

Event#: 1 MS(E+) Ret. Time : 1.307 Scan# : 197

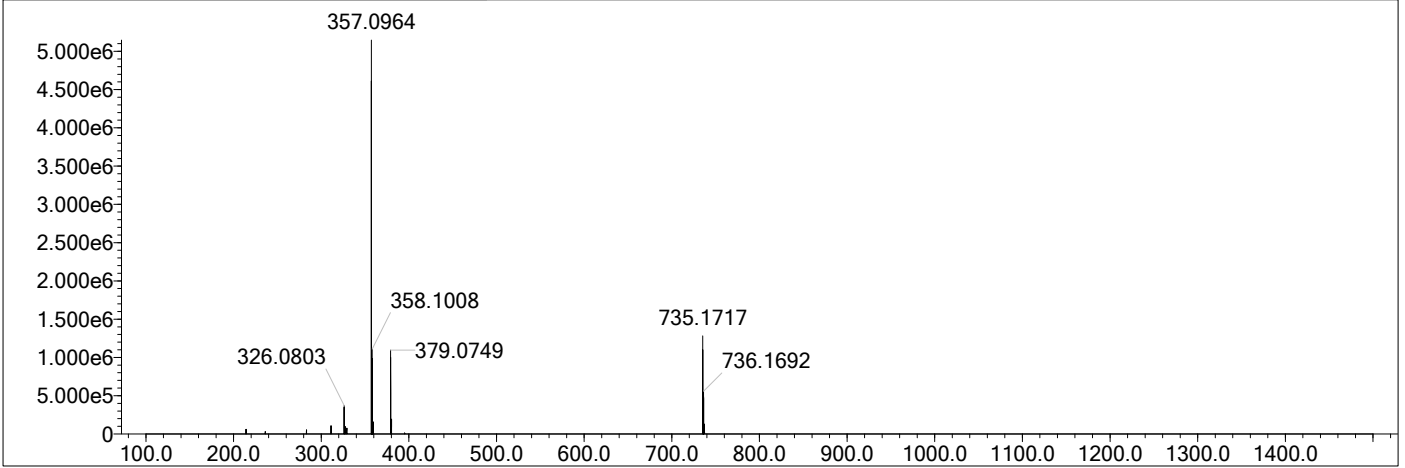

Measured region for 357.0964 m/z

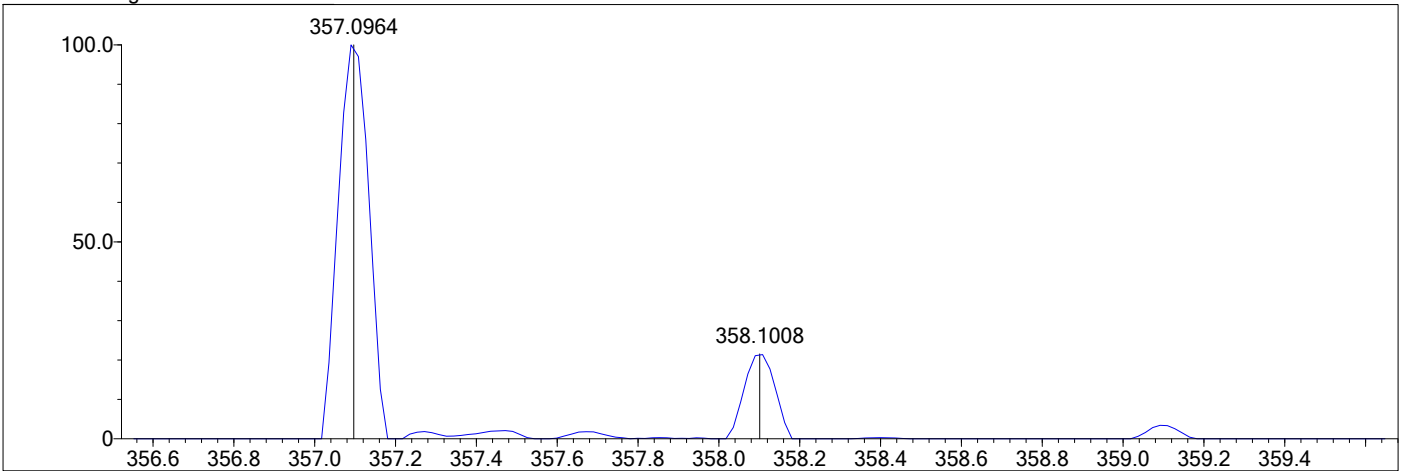

C19H16O7 [M+H]<sup>+</sup> : Predicted region for 357.0969 m/z

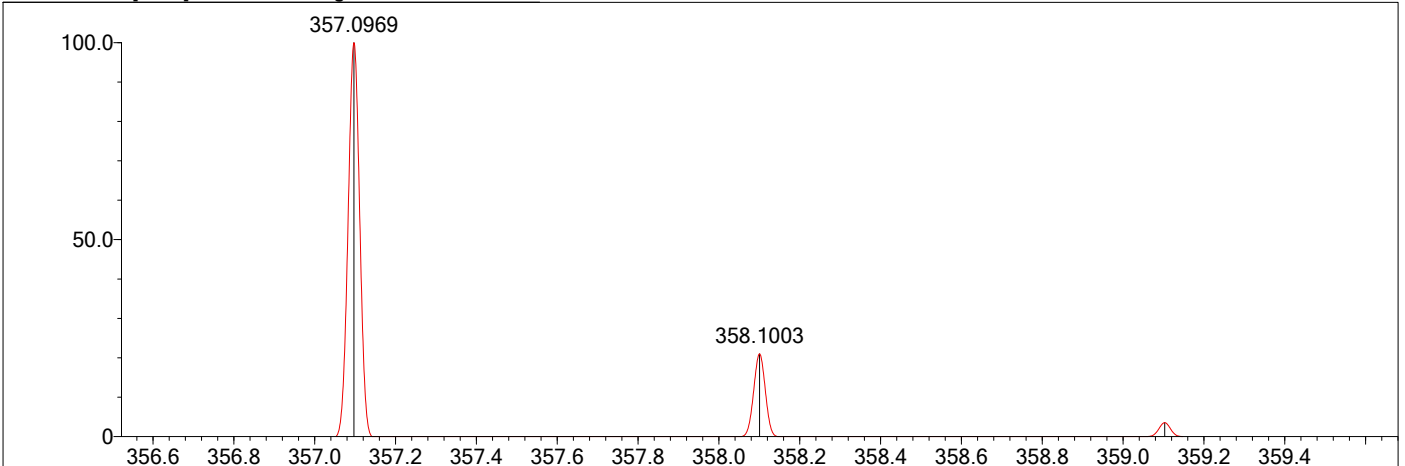

| Rank | Score | Formula (M) | Ion                | Meas. m/z | Pred. m/z | Df. (mDa) | Df. (ppm) | Iso   | DBE  |
|------|-------|-------------|--------------------|-----------|-----------|-----------|-----------|-------|------|
| 1    | 82.79 | C19H16O7    | [M+H] <sup>+</sup> | 357.0964  | 357.0969  | -0.5      | -1.40     | 83.63 | 12.0 |



Data File: F:\高分辨数据\Zouyong\sjf\S14.lcd

| Elmt | Val. | Min | Max | Use Adduct |
|------|------|-----|-----|------|------|-----|-----|------|------|-----|-----|------|------|-----|-----|------------|
| H    | 1    | 0   | 80  | O    | 2    | 0   | 20  | P    | 3    | 0   | 0   | Zn   | 2    | 0   | 0   | H          |
| 2H   | 1    | 0   | 0   | 18O  | 2    | 0   | 0   | S    | 2    | 0   | 0   | Se   | 2    | 0   | 0   |            |
| B    | 3    | 0   | 0   | F    | 1    | 0   | 0   | Cl   | 1    | 0   | 0   | Br   | 1    | 0   | 0   |            |
| C    | 4    | 0   | 60  | Na   | 1    | 0   | 0   | K    | 1    | 0   | 0   |      |      |     |     |            |
| N    | 3    | 0   | 0   | Si   | 4    | 0   | 0   | Mn   | 3    | 0   | 0   |      |      |     |     |            |

Error Margin (ppm): 100  
 HC Ratio: unlimited  
 Max Isotopes: all  
 MSn Iso RI (%): 75.00

DBE Range: -2.0 - 1000.0  
 Apply N Rule: yes  
 Isotope RI (%): 1.00  
 MSn Logic Mode: AND

Electron Ions: both  
 Use MSn Info: no  
 Isotope Res: 10000  
 Max Results: 500

1q

Event#: 1 MS(E+) Ret. Time : 1.693 Scan# : 255

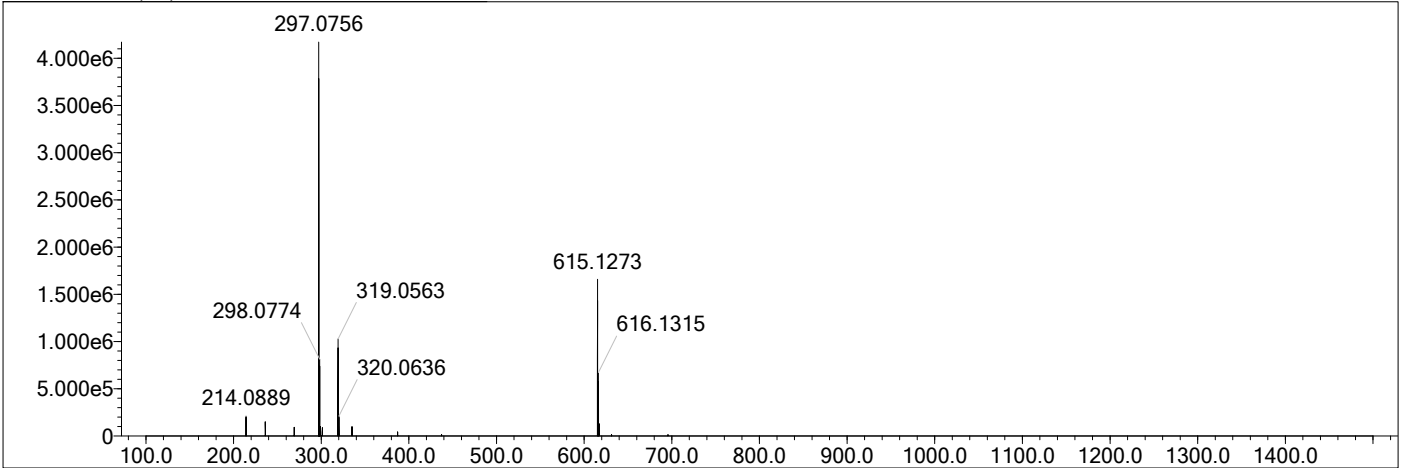

Measured region for 297.0756 m/z

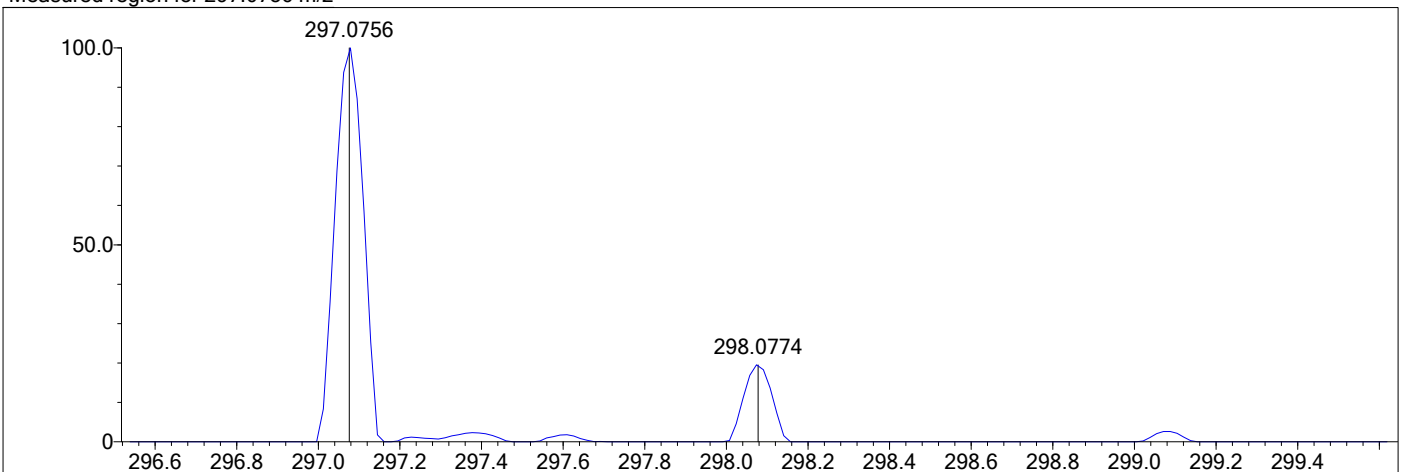

C17 H12 O5 [M+H]+ : Predicted region for 297.0758 m/z



| Rank | Score | Formula (M) | Ion    | Meas. m/z | Pred. m/z | Df. (mDa) | Df. (ppm) | Iso   | DBE  |
|------|-------|-------------|--------|-----------|-----------|-----------|-----------|-------|------|
| 1    | 74.57 | C17 H12 O5  | [M+H]+ | 297.0756  | 297.0758  | -0.2      | -0.67     | 74.57 | 12.0 |

Data File: \\Deep-20160624\data1\邹永\SXH\SJF-1R.lcd

| Elmt | Val. | Min | Max | Use Adduct |
|------|------|-----|-----|------|------|-----|-----|------|------|-----|-----|------|------|-----|-----|------------|
| H    | 1    | 14  | 16  | O    | 2    | 5   | 8   | K    | 1    | 0   | 0   | Pd   | 2    | 0   | 0   | H          |
| 2H   | 1    | 0   | 0   | F    | 1    | 0   | 0   | Mn   | 3    | 0   | 0   | I    | 3    | 0   | 0   | Na         |
| 3H   | 1    | 0   | 0   | Si   | 4    | 0   | 0   | Fe   | 2    | 0   | 0   | Pt   | 2    | 0   | 0   |            |
| B    | 3    | 0   | 0   | P    | 3    | 0   | 0   | Cu   | 2    | 0   | 0   | Au   | 1    | 0   | 0   |            |
| C    | 4    | 18  | 19  | S    | 2    | 0   | 0   | Se   | 2    | 0   | 0   |      |      |     |     |            |
| N    | 3    | 0   | 0   | Cl   | 1    | 0   | 0   | Br   | 1    | 0   | 0   |      |      |     |     |            |

Error Margin (ppm): 100  
 HC Ratio: 0.0 - 100.0  
 Max Isotopes: all  
 MSn Iso RI (%): 75.00

DBE Range: -100.0 - 200.0  
 Apply N Rule: yes  
 Isotope RI (%): 1.00  
 MSn Logic Mode: AND

Electron Ions: both  
 Use MSn Info: no  
 Isotope Res: 10000  
 Max Results: 100

**1r**

Event#: 1 MS(E+) Ret. Time : 1.040 -> 1.040 Scan# : 157 -> 157

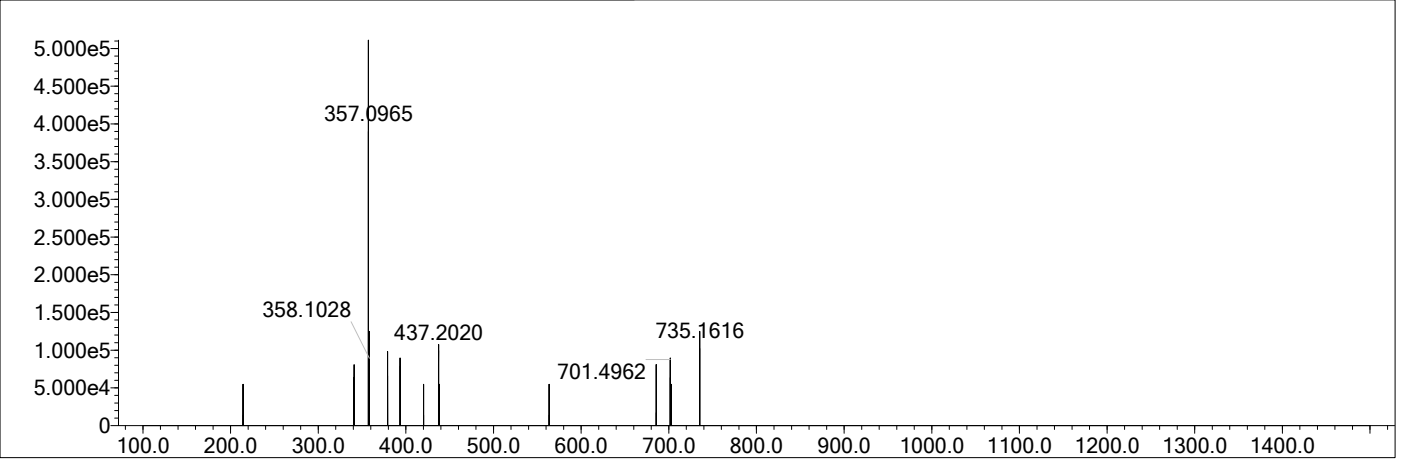

Measured region for 357.0965 m/z

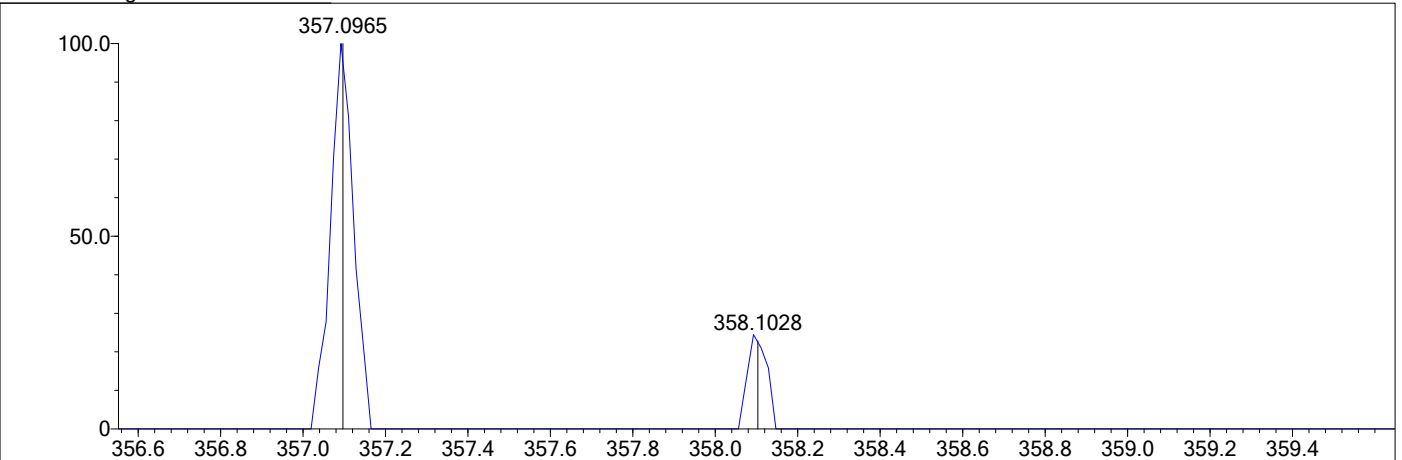

C19 H16 O7 [M+H]<sup>+</sup> : Predicted region for 357.0969 m/z

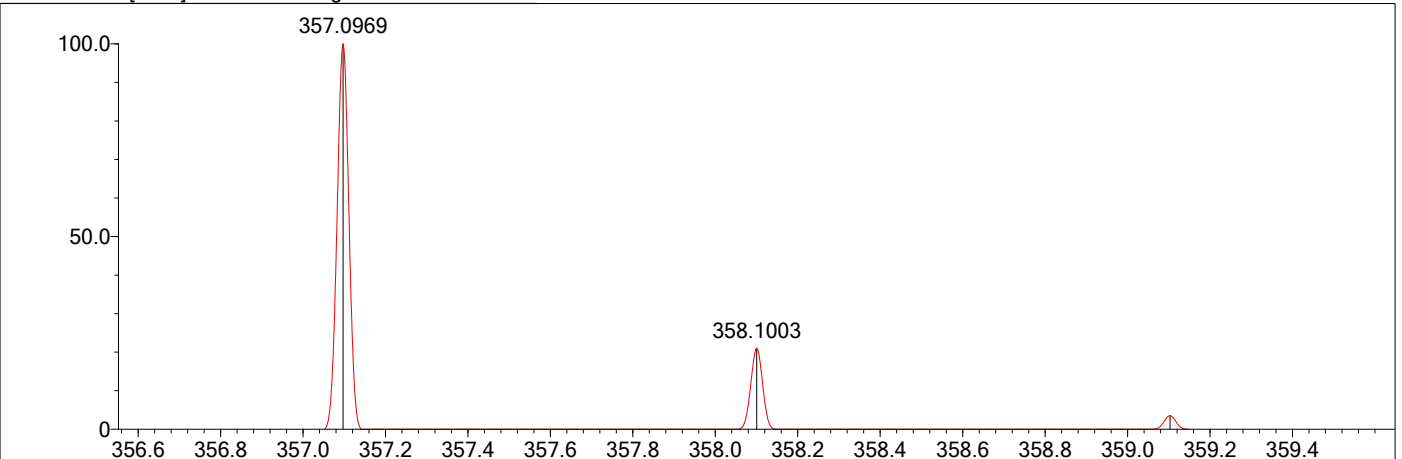

| Rank | Score | Formula (M) | Ion                | Meas. m/z | Pred. m/z | Df. (mDa) | Df. (ppm) | Iso   | DBE  |
|------|-------|-------------|--------------------|-----------|-----------|-----------|-----------|-------|------|
| 1    | 72.56 | C19 H16 O7  | [M+H] <sup>+</sup> | 357.0965  | 357.0969  | -0.4      | -1.12     | 72.78 | 12.0 |

Data File: \\Deep-20160624\data1\邹永\SXH\SJF-1S.lcd

| Elmt | Val. | Min | Max | Use Adduct |
|------|------|-----|-----|------|------|-----|-----|------|------|-----|-----|------|------|-----|-----|------------|
| H    | 1    | 6   | 8   | O    | 2    | 4   | 5   | K    | 1    | 0   | 0   | Pd   | 2    | 0   | 0   | H          |
| 2H   | 1    | 0   | 0   | F    | 1    | 0   | 0   | Mn   | 3    | 0   | 0   | I    | 3    | 0   | 0   | Na         |
| 3H   | 1    | 0   | 0   | Si   | 4    | 0   | 0   | Fe   | 2    | 0   | 0   | Pt   | 2    | 0   | 0   |            |
| B    | 3    | 0   | 0   | P    | 3    | 0   | 0   | Cu   | 2    | 0   | 0   | Au   | 1    | 0   | 0   |            |
| C    | 4    | 14  | 15  | S    | 2    | 0   | 0   | Se   | 2    | 0   | 0   |      |      |     |     |            |
| N    | 3    | 0   | 0   | Cl   | 1    | 0   | 0   | Br   | 1    | 0   | 0   |      |      |     |     |            |

Error Margin (ppm): 100  
 HC Ratio: 0.0 - 100.0  
 Max Isotopes: all  
 MSn Iso RI (%): 75.00

DBE Range: -100.0 - 200.0  
 Apply N Rule: yes  
 Isotope RI (%): 1.00  
 MSn Logic Mode: AND

Electron Ions: both  
 Use MSn Info: no  
 Isotope Res: 10000  
 Max Results: 100

1s

Event#: 1 MS(E+) Ret. Time: 0.800 -> 0.800 Scan#: 121 -> 121

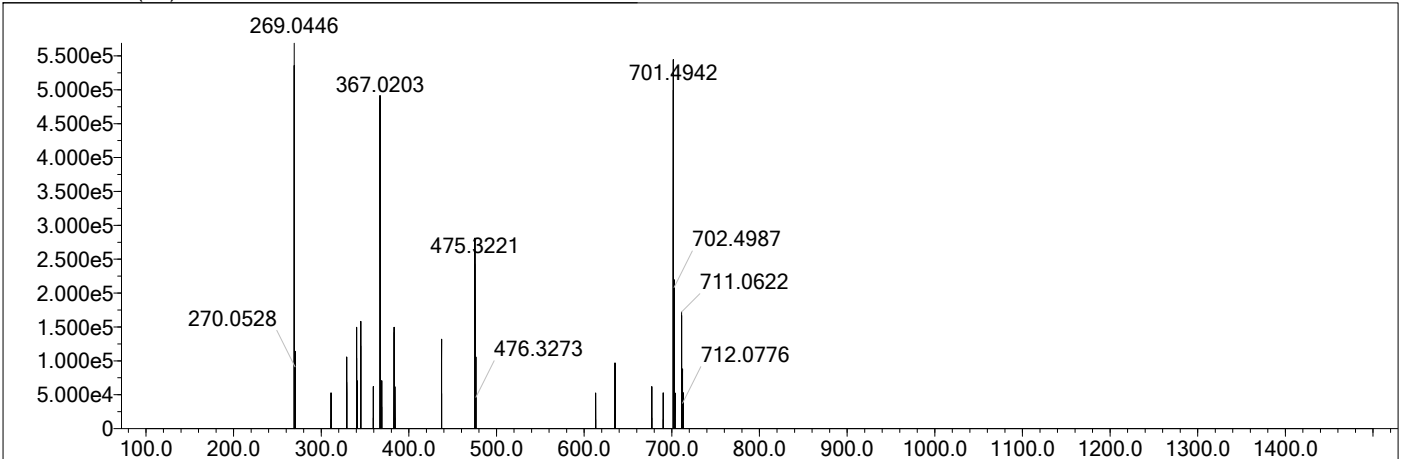

Measured region for 269.0446 m/z

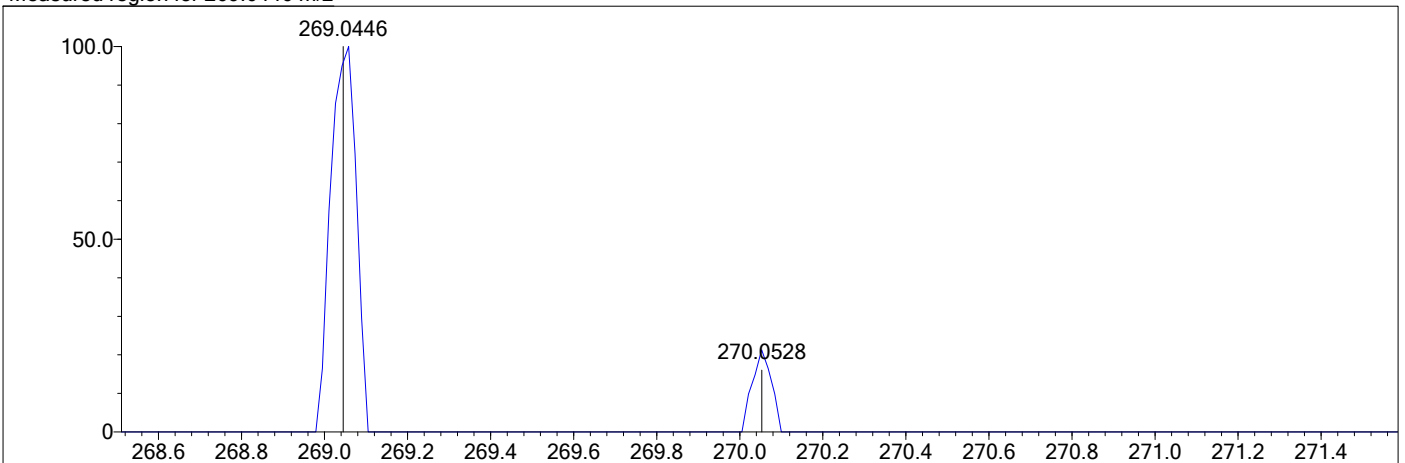

C15 H8 O5 [M+H]+ : Predicted region for 269.0444 m/z

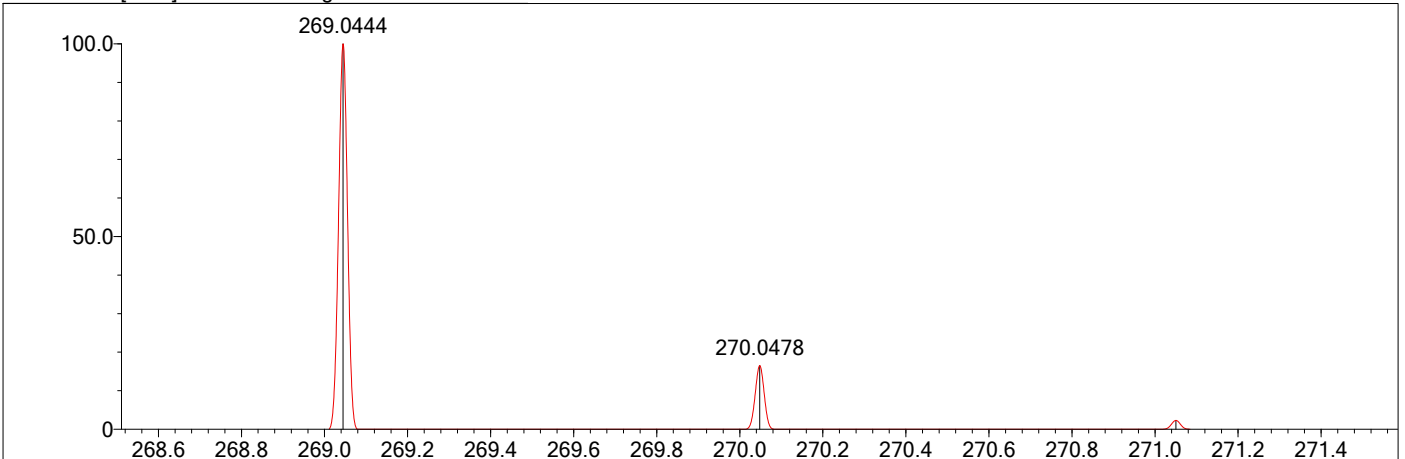

| Rank | Score | Formula (M) | Ion    | Meas. m/z | Pred. m/z | Df. (mDa) | Df. (ppm) | Iso   | DBE  |
|------|-------|-------------|--------|-----------|-----------|-----------|-----------|-------|------|
| 1    | 62.11 | C15 H8 O5   | [M+H]+ | 269.0446  | 269.0444  | 0.2       | 0.74      | 62.11 | 12.0 |

Data File: F:\高分辨数据\Zouyong\sjf\S16.lcd

| Elmt | Val. | Min | Max | Use Adduct |
|------|------|-----|-----|------|------|-----|-----|------|------|-----|-----|------|------|-----|-----|------------|
| H    | 1    | 0   | 80  | O    | 2    | 0   | 20  | P    | 3    | 0   | 0   | Zn   | 2    | 0   | 0   | H          |
| 2H   | 1    | 0   | 0   | 18O  | 2    | 0   | 0   | S    | 2    | 0   | 0   | Se   | 2    | 0   | 0   |            |
| B    | 3    | 0   | 0   | F    | 1    | 0   | 0   | Cl   | 1    | 0   | 0   | Br   | 1    | 0   | 0   |            |
| C    | 4    | 0   | 60  | Na   | 1    | 0   | 0   | K    | 1    | 0   | 0   |      |      |     |     |            |
| N    | 3    | 0   | 0   | Si   | 4    | 0   | 0   | Mn   | 3    | 0   | 0   |      |      |     |     |            |

Error Margin (ppm): 100  
 HC Ratio: unlimited  
 Max Isotopes: all  
 MSn Iso RI (%): 75.00

DBE Range: -2.0 - 1000.0  
 Apply N Rule: yes  
 Isotope RI (%): 1.00  
 MSn Logic Mode: AND

Electron Ions: both  
 Use MSn Info: no  
 Isotope Res: 10000  
 Max Results: 500

1t

Event#: 1 MS(E+) Ret. Time : 1.333 Scan# : 201

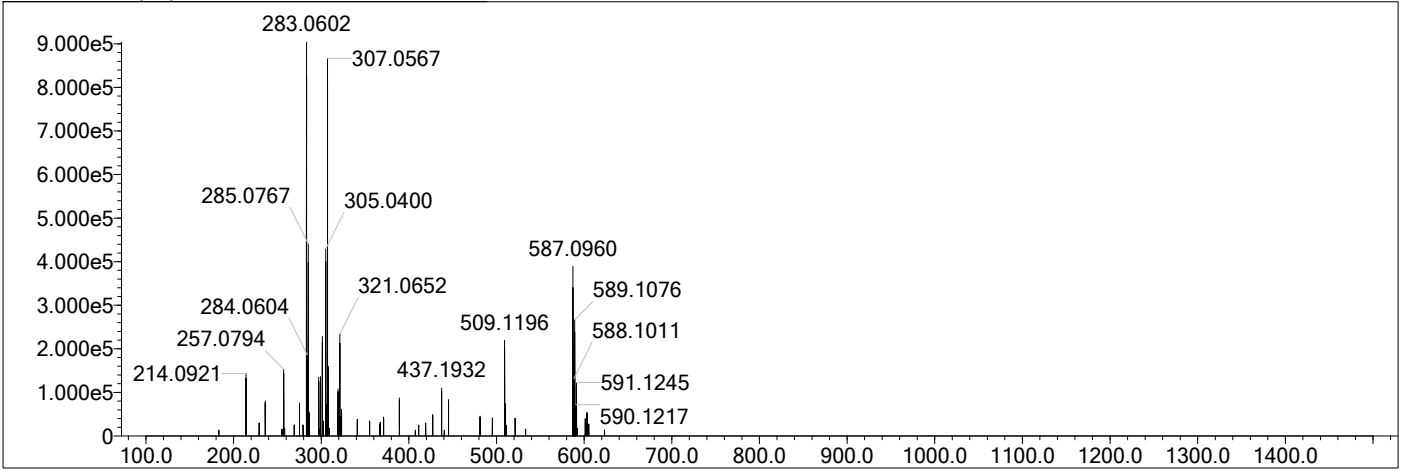

Measured region for 283.0602 m/z

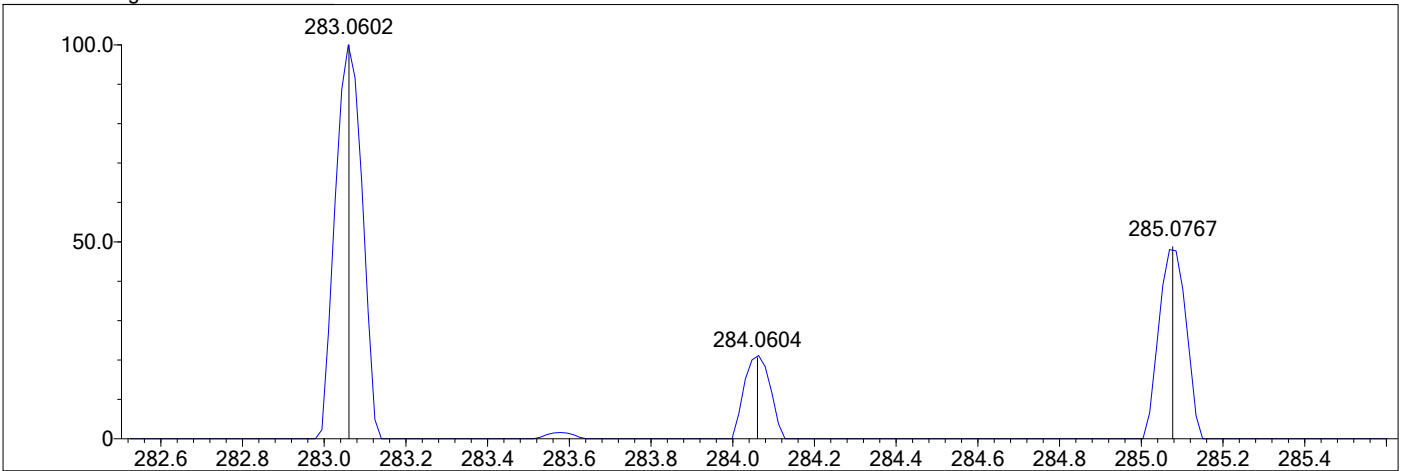

C16 H10 O5 [M+H]+ : Predicted region for 283.0601 m/z



| Rank | Score | Formula (M) | Ion                | Meas. m/z | Pred. m/z | Df. (mDa) | Df. (ppm) | Iso   | DBE  |
|------|-------|-------------|--------------------|-----------|-----------|-----------|-----------|-------|------|
| 1    | 29.38 | C16 H10 O5  | [M+H] <sup>+</sup> | 283.0602  | 283.0601  | 0.1       | 0.35      | 29.38 | 12.0 |

Data File: F:\高分辨数据\Zouyong\sjf\S17.lcd

| Elmt | Val. | Min | Max | Use Adduct |
|------|------|-----|-----|------|------|-----|-----|------|------|-----|-----|------|------|-----|-----|------------|
| H    | 1    | 0   | 80  | O    | 2    | 0   | 20  | P    | 3    | 0   | 0   | Zn   | 2    | 0   | 0   | H          |
| 2H   | 1    | 0   | 0   | 18O  | 2    | 0   | 0   | S    | 2    | 0   | 0   | Se   | 2    | 0   | 0   |            |
| B    | 3    | 0   | 0   | F    | 1    | 0   | 0   | Cl   | 1    | 0   | 0   | Br   | 1    | 0   | 0   |            |
| C    | 4    | 0   | 60  | Na   | 1    | 0   | 0   | K    | 1    | 0   | 0   |      |      |     |     |            |
| N    | 3    | 0   | 0   | Si   | 4    | 0   | 0   | Mn   | 3    | 0   | 0   |      |      |     |     |            |
|      |      |     |     |      |      |     |     |      |      |     |     |      |      |     |     |            |

Error Margin (ppm): 100  
 HC Ratio: unlimited  
 Max Isotopes: all  
 MSn Iso RI (%): 75.00

DBE Range: -2.0 - 1000.0  
 Apply N Rule: yes  
 Isotope RI (%): 1.00  
 MSn Logic Mode: AND

Electron Ions: both  
 Use MSn Info: no  
 Isotope Res: 10000  
 Max Results: 500

1u

Event#: 1 MS(E+) Ret. Time : 1.240 Scan#: 187

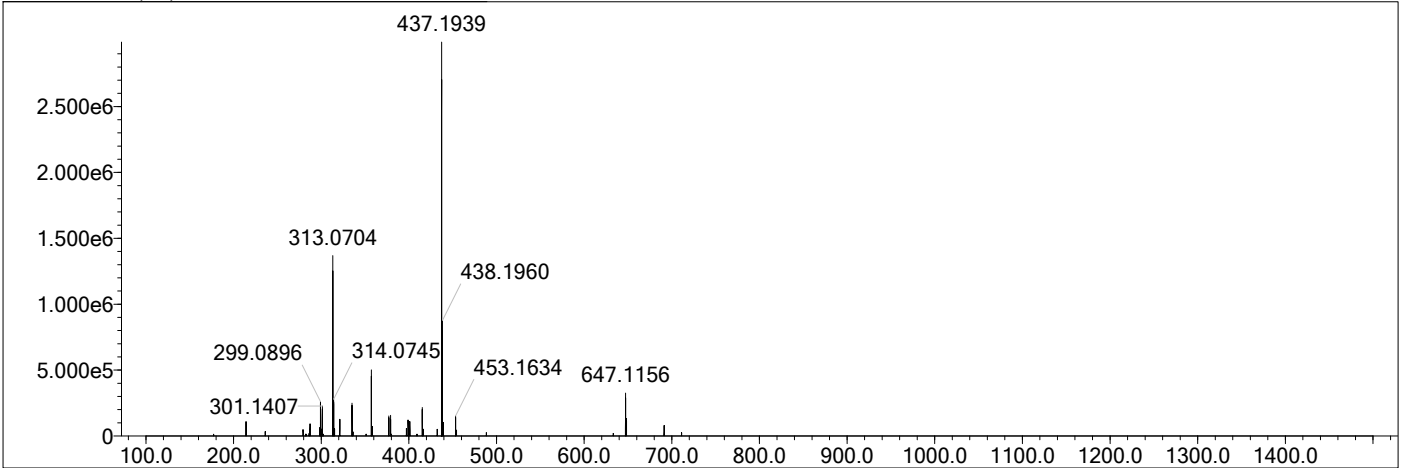

Measured region for 313.0704 m/z

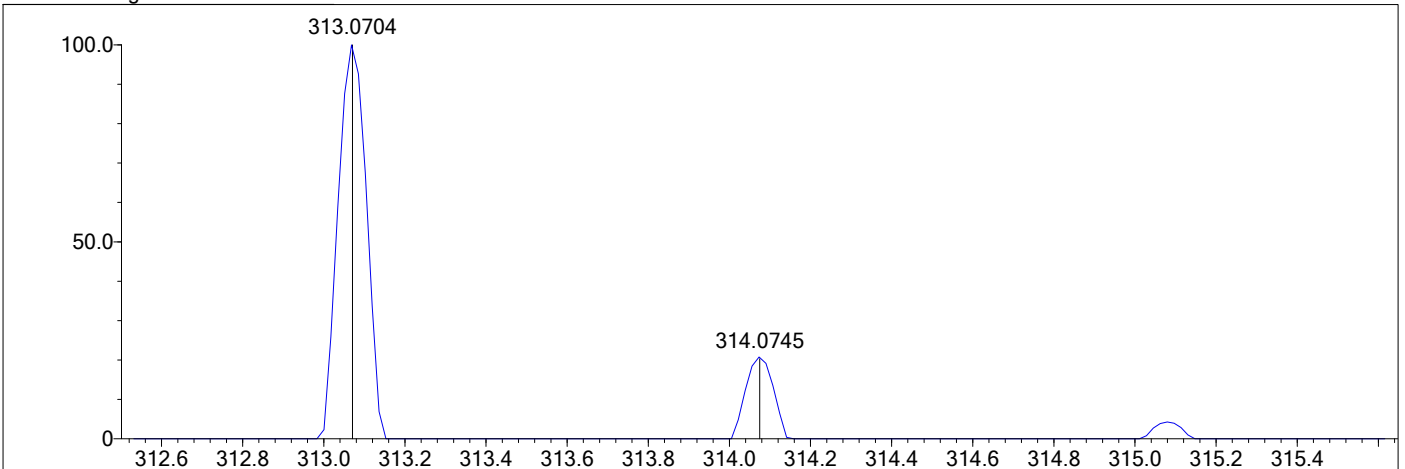

C17 H12 O6 [M+H]<sup>+</sup> : Predicted region for 313.0707 m/z

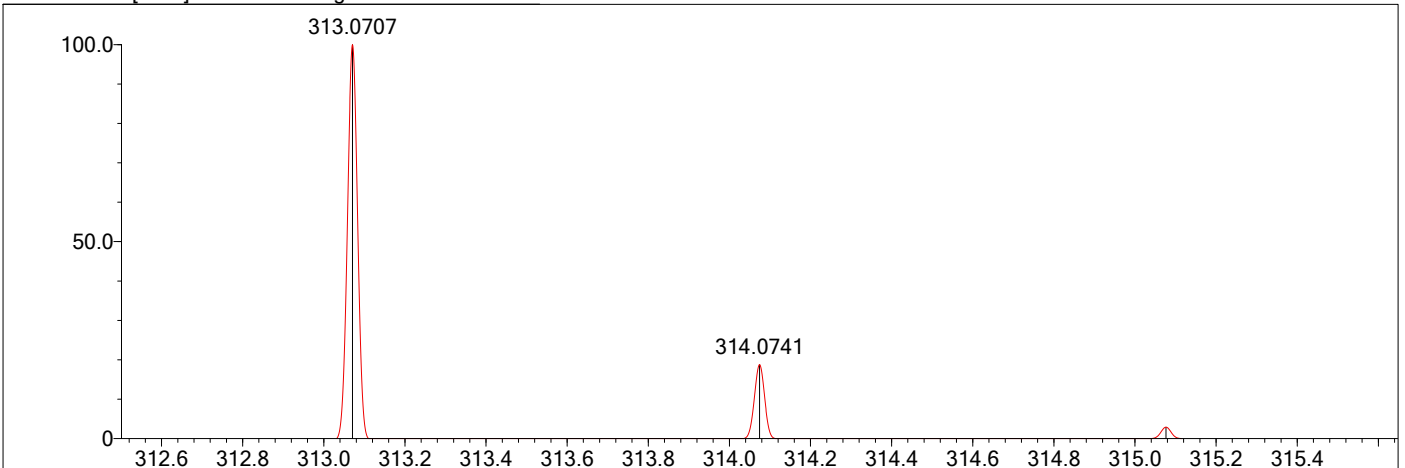

| Rank | Score | Formula (M) | Ion                | Meas. m/z | Pred. m/z | Df. (mDa) | Df. (ppm) | Iso   | DBE  |
|------|-------|-------------|--------------------|-----------|-----------|-----------|-----------|-------|------|
| 1    | 86.34 | C17 H12 O6  | [M+H] <sup>+</sup> | 313.0704  | 313.0707  | -0.3      | -0.96     | 86.34 | 12.0 |

Data File: F:\高分辨数据\Zouyong\sjf\S18.lcd

| Elmt | Val. | Min | Max | Use Adduct |
|------|------|-----|-----|------|------|-----|-----|------|------|-----|-----|------|------|-----|-----|------------|
| H    | 1    | 0   | 80  | O    | 2    | 0   | 20  | P    | 3    | 0   | 0   | Zn   | 2    | 0   | 0   | H          |
| 2H   | 1    | 0   | 0   | 18O  | 2    | 0   | 0   | S    | 2    | 0   | 0   | Se   | 2    | 0   | 0   |            |
| B    | 3    | 0   | 0   | F    | 1    | 0   | 0   | Cl   | 1    | 0   | 0   | Br   | 1    | 0   | 0   |            |
| C    | 4    | 0   | 60  | Na   | 1    | 0   | 0   | K    | 1    | 0   | 0   |      |      |     |     |            |
| N    | 3    | 0   | 0   | Si   | 4    | 0   | 0   | Mn   | 3    | 0   | 0   |      |      |     |     |            |
|      |      |     |     |      |      |     |     |      |      |     |     |      |      |     |     |            |

Error Margin (ppm): 100  
 HC Ratio: unlimited  
 Max Isotopes: all  
 MSn Iso RI (%): 75.00

DBE Range: -2.0 - 1000.0  
 Apply N Rule: yes  
 Isotope RI (%): 1.00  
 MSn Logic Mode: AND

Electron Ions: both  
 Use MSn Info: no  
 Isotope Res: 10000  
 Max Results: 500

1v

Event#: 1 MS(E+) Ret. Time : 1.200 Scan# : 181

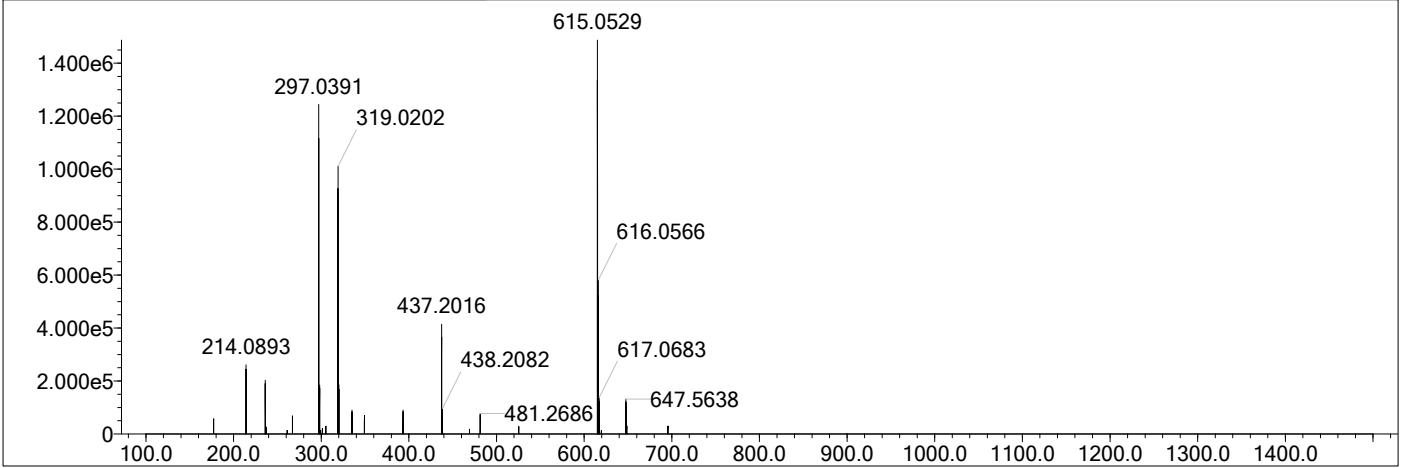

Measured region for 297.0391 m/z

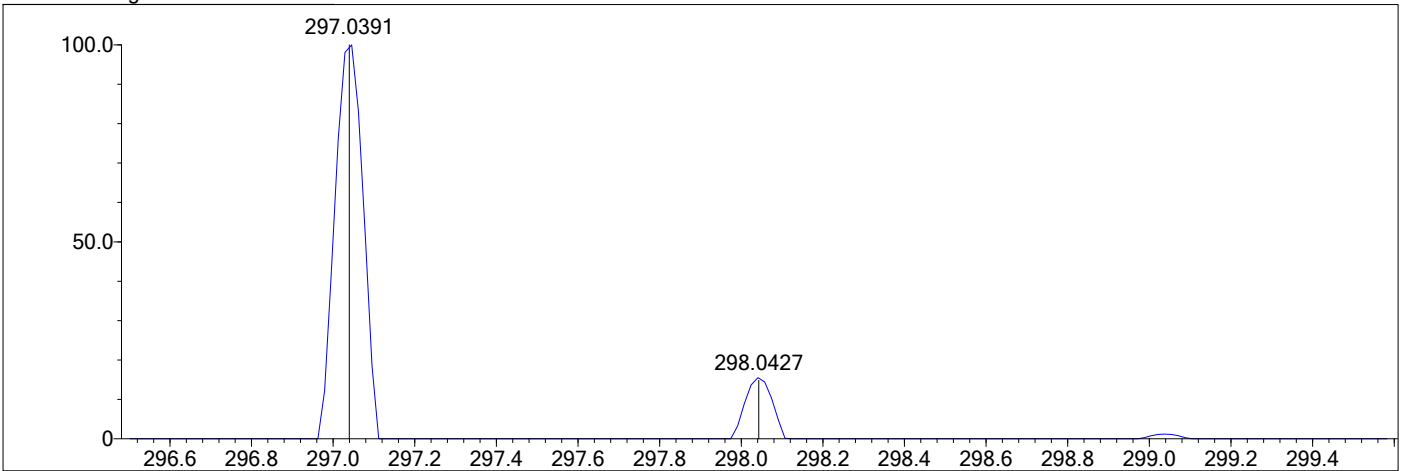

C16 H8 O6 [M+H]<sup>+</sup> : Predicted region for 297.0394 m/z

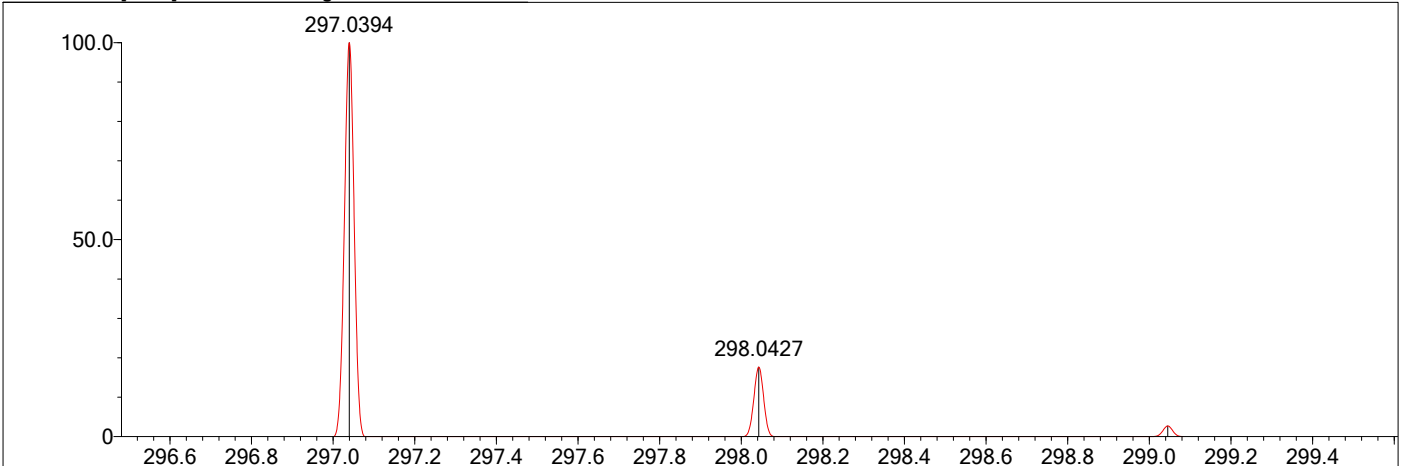

| Rank | Score | Formula (M) | Ion                | Meas. m/z | Pred. m/z | Df. (mDa) | Df. (ppm) | Iso   | DBE  |
|------|-------|-------------|--------------------|-----------|-----------|-----------|-----------|-------|------|
| 1    | 71.95 | C16 H8 O6   | [M+H] <sup>+</sup> | 297.0391  | 297.0394  | -0.3      | -1.01     | 71.96 | 13.0 |

Data File: F:\高分辨数据\Zouyong\sjf\S19.lcd

| Elmt | Val. | Min | Max | Use Adduct |
|------|------|-----|-----|------|------|-----|-----|------|------|-----|-----|------|------|-----|-----|------------|
| H    | 1    | 0   | 80  | O    | 2    | 0   | 20  | P    | 3    | 0   | 0   | Zn   | 2    | 0   | 0   | H          |
| 2H   | 1    | 0   | 0   | 18O  | 2    | 0   | 0   | S    | 2    | 0   | 0   | Se   | 2    | 0   | 0   |            |
| B    | 3    | 0   | 0   | F    | 1    | 0   | 0   | Cl   | 1    | 0   | 0   | Br   | 1    | 0   | 0   |            |
| C    | 4    | 0   | 60  | Na   | 1    | 0   | 0   | K    | 1    | 0   | 0   |      |      |     |     |            |
| N    | 3    | 0   | 0   | Si   | 4    | 0   | 0   | Mn   | 3    | 0   | 0   |      |      |     |     |            |
|      |      |     |     |      |      |     |     |      |      |     |     |      |      |     |     |            |

Error Margin (ppm): 100  
 HC Ratio: unlimited  
 Max Isotopes: all  
 MSn Iso RI (%): 75.00

DBE Range: -2.0 - 1000.0  
 Apply N Rule: yes  
 Isotope RI (%): 1.00  
 MSn Logic Mode: AND

Electron Ions: both  
 Use MSn Info: no  
 Isotope Res: 10000  
 Max Results: 500

**1w**

Event#: 1 MS(E+) Ret. Time : 1.413 Scan# : 213

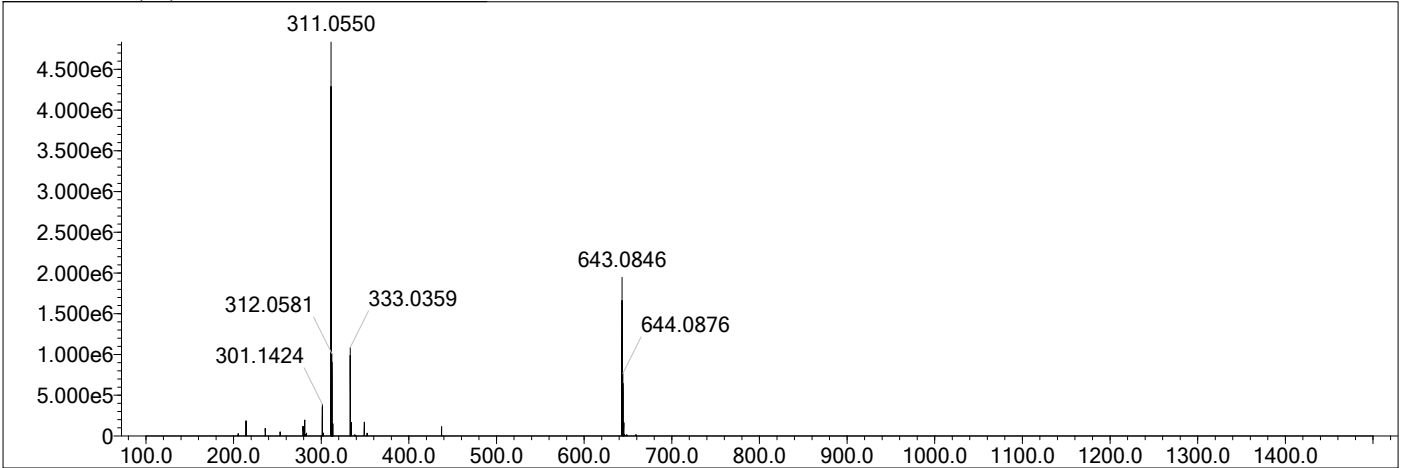

Measured region for 311.0550 m/z

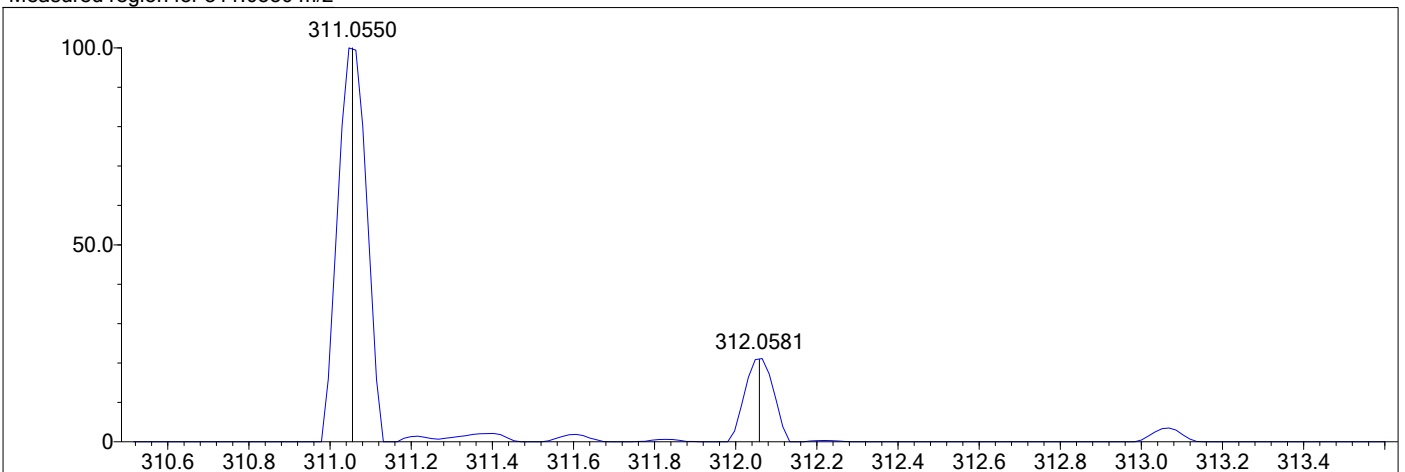

C17 H10 O6 [M+H]<sup>+</sup> : Predicted region for 311.0550 m/z

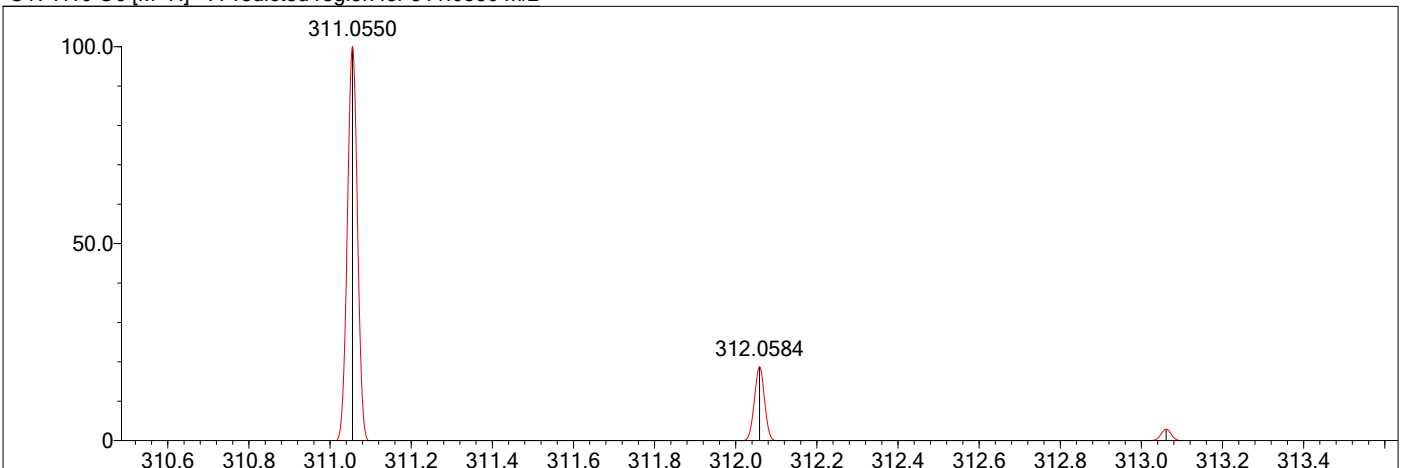

| Rank | Score | Formula (M) | Ion                | Meas. m/z | Pred. m/z | Df. (mDa) | Df. (ppm) | Iso   | DBE  |
|------|-------|-------------|--------------------|-----------|-----------|-----------|-----------|-------|------|
| 1    | 74.93 | C17 H10 O6  | [M+H] <sup>+</sup> | 311.0550  | 311.0550  | -0.0      | 0.00      | 74.93 | 13.0 |

Data File: F:\高分辨数据\Zouyong\sjf\S20.lcd

| Elmt | Val. | Min | Max | Use Adduct |
|------|------|-----|-----|------|------|-----|-----|------|------|-----|-----|------|------|-----|-----|------------|
| H    | 1    | 0   | 80  | O    | 2    | 0   | 20  | P    | 3    | 0   | 0   | Zn   | 2    | 0   | 0   | H          |
| 2H   | 1    | 0   | 0   | 18O  | 2    | 0   | 0   | S    | 2    | 1   | 1   | Se   | 2    | 0   | 0   |            |
| B    | 3    | 0   | 0   | F    | 1    | 0   | 0   | Cl   | 1    | 0   | 0   | Br   | 1    | 0   | 0   |            |
| C    | 4    | 0   | 60  | Na   | 1    | 0   | 0   | K    | 1    | 0   | 0   |      |      |     |     |            |
| N    | 3    | 0   | 0   | Si   | 4    | 0   | 0   | Mn   | 3    | 0   | 0   |      |      |     |     |            |
|      |      |     |     |      |      |     |     |      |      |     |     |      |      |     |     |            |

Error Margin (ppm): 100  
 HC Ratio: unlimited  
 Max Isotopes: all  
 MSn Iso RI (%): 75.00

DBE Range: -2.0 - 1000.0  
 Apply N Rule: yes  
 Isotope RI (%): 1.00  
 MSn Logic Mode: AND

Electron Ions: both  
 Use MSn Info: no  
 Isotope Res: 10000  
 Max Results: 500

1jj

Event#: 1 MS(E+) Ret. Time : 1.240 Scan#: 187

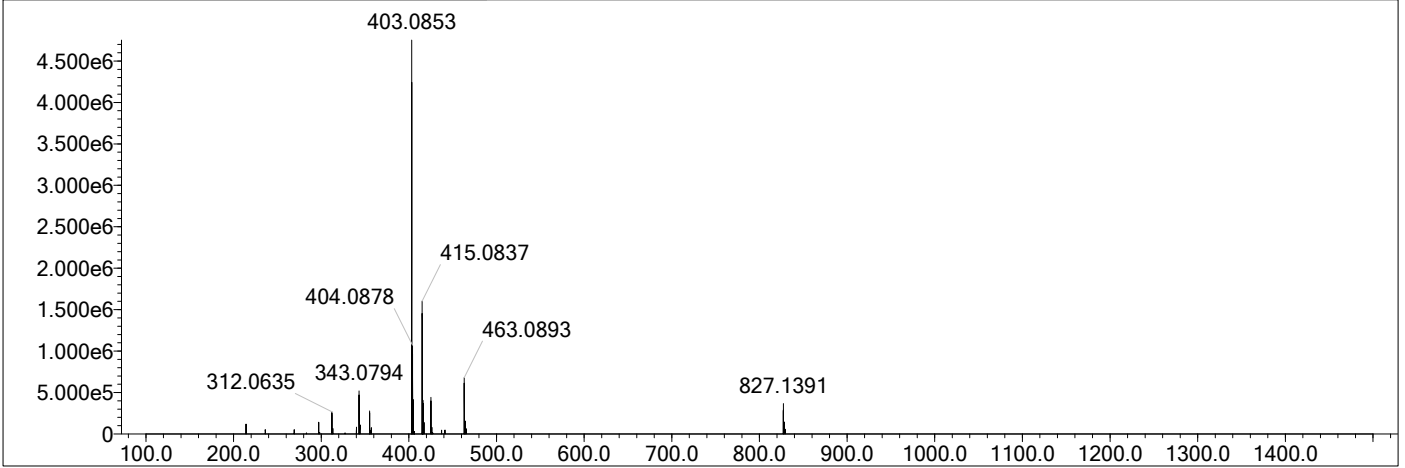

Measured region for 403.0853 m/z

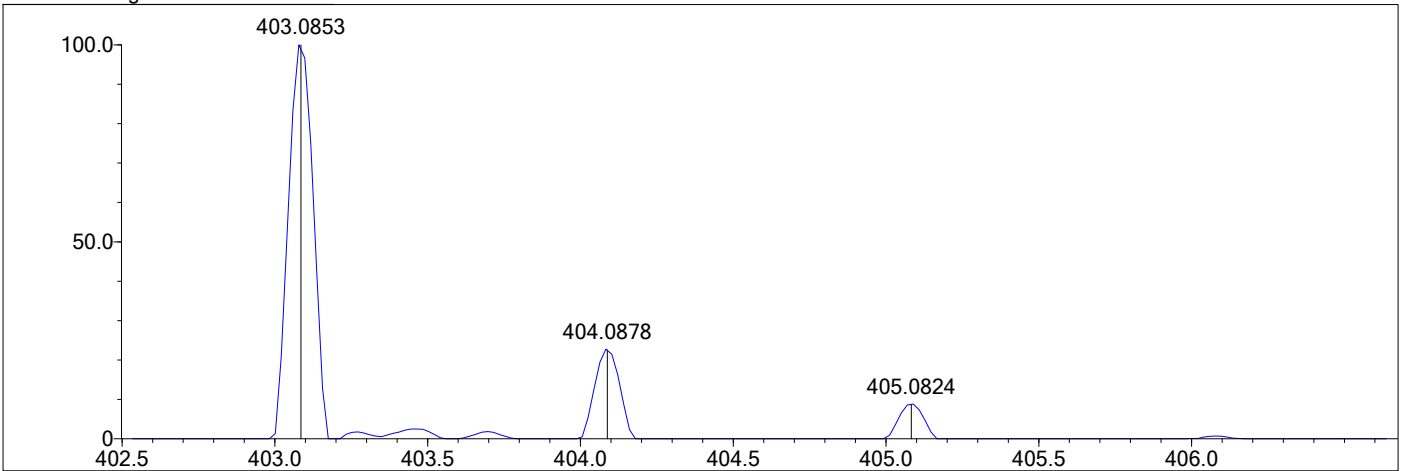

C20 H18 O7 S [M+H]<sup>+</sup> : Predicted region for 403.0846 m/z

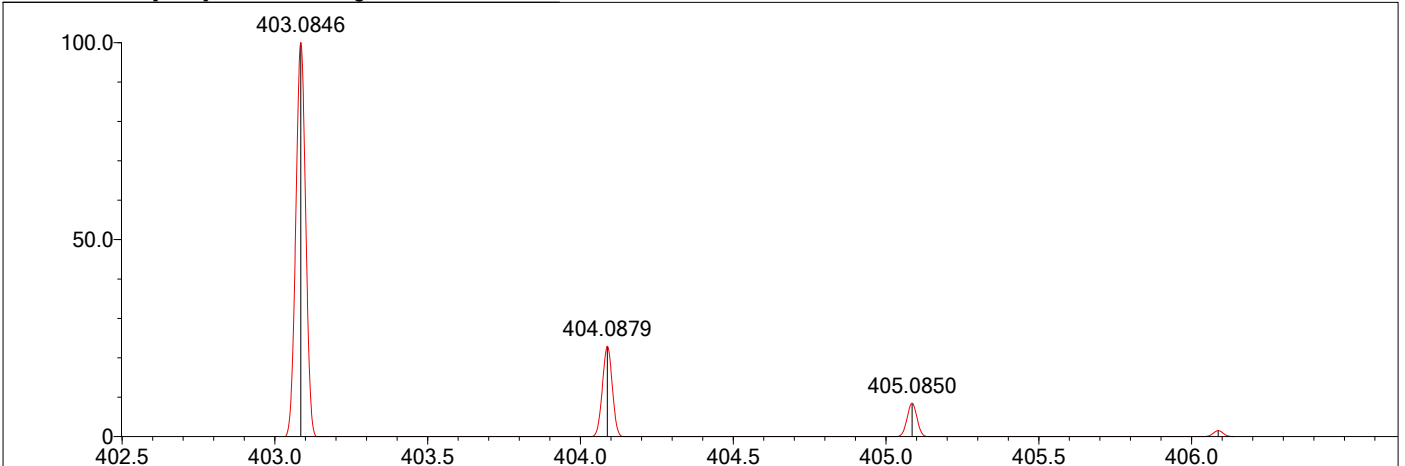

| Rank | Score | Formula (M)  | Ion                | Meas. m/z | Pred. m/z | Df. (mDa) | Df. (ppm) | Iso   | DBE  |
|------|-------|--------------|--------------------|-----------|-----------|-----------|-----------|-------|------|
| 1    | 85.83 | C20 H18 O7 S | [M+H] <sup>+</sup> | 403.0853  | 403.0846  | 0.7       | 1.74      | 87.45 | 12.0 |
